# Supplementary material
Source: publisher site journal article supplement (https://www.spandidos-publications.com/278/downloadSupplementary)
Supplement: Supplementary file 1 [file downloadSupplementary]

## Sheet: FTC_HC_change
16	17	18	19	20	21	22	23	24	25	46	47	48	49	50	51	C: Student's T-test Significant HC_FC	N: -Log Student's T-test p-value HC_FC	FDR value	N: Mean HC	N: Mean FC	ratio_FC/HC	protein	T: PG.ProteinDescriptions	T: PG.ProteinGroups
669051	371908	406841	334706	371318	580118	406304	222369	254332	3172940	477428	2135020	1319130	2048860	10162300	3619570	+	1.41079	0.0490286	678989	3293720	2.27826	P02763	Alpha-1-acid glycoprotein 1	A1AG1_HUMAN
170473	107331	163900	106697	153536	137162	113900	137053	110961	566745	182853	543173	410934	441609	1338910	734067	+	2.16455	0.00738462	176776	608591	1.78355	P19652	Alpha-1-acid glycoprotein 2	A1AG2_HUMAN
998990	1672870	1200980	1426940	1158550	1264550	1855500	1166220	1409790	3724180	5369820	3427440	4508250	5593930	4608840	15214900	+	2.46348	0.00348387	1587860	6453860	2.02308	P01009	Alpha-1-antitrypsin	A1AT_HUMAN
6085370	8034880	7117310	5483940	8054410	5931960	7696080	7013210	6575690	18546400	12191200	22537800	11317900	14318200	29421000	15763100	+	2.50536	0.0032	8053930	17591500	1.12711	P04217	Alpha-1B-glycoprotein	A1BG_HUMAN
943038	2430400	1416720	1076120	1584370	1810550	1317810	1055670	1685270	6218580	4496440	5522040	4584480	11938000	4169910	23787000	+	1.90655	0.013913	1953850	9082970	2.21684	P02750	Leucine-rich alpha-2-glycoprotein	A2GL_HUMAN
4040.7	3132.62	2147.86	4446.49	5839.19	1934.07	2879.76	3953.84	2820.86	3341.85	0	0	0	372.147	0	0	+	5.21974	0	3453.72	62.0245	-5.79917	P05067	Amyloid beta A4 protein	A4_HUMAN
6360450	9020760	8443460	8377330	8404450	8108590	8224270	7149310	5364240	20473400	21815700	42948700	39884300	63607900	58541300	64480400	+	5.37961	0	8992630	48546400	2.43255	P01011	Alpha-1-antichymotrypsin	AACT_HUMAN
12743.1	12335.5	29672.7	25098.8	26335.5	28101	35118	22836.2	14729.3	63368.6	4398.96	23794.6	12774.3	15863	8790.63	10304.2		1.35903	0.0579444	27033.9	12654.3	-1.09514	P62736;P68032;P63267;P68133	Actin, aortic smooth muscle;Actin, alpha cardiac muscle 1;Actin, gamma-enteric smooth muscle;Actin, alpha skeletal muscle	ACTA_HUMAN;ACTC_HUMAN;ACTH_HUMAN;ACTS_HUMAN
1085400	733360	661145	744504	536099	768553	695972	903017	541667	902571	1031370	2839760	1316590	2059340	5705120	998262	+	1.84759	0.0166531	757229	2325070	1.61847	P43652	Afamin	AFAM_HUMAN
12358.5	22519.2	15965.7	13815.2	9447.65	18261.6	18068.3	19905.1	12644.7	11047.7	51352.8	31786.7	56997.6	49643.3	49496.1	39228.2	+	6.64982	0	15403.4	46417.4	1.59142	P15144	Aminopeptidase N	AMPN_HUMAN
11070800	17372500	10086100	12545800	21825100	10905200	19869400	12442300	14783100	9020170	860716	1809210	1235270	2355210	3963900	1574670	+	4.8944	0	13992000	1966500	-2.8309	P02647	Apolipoprotein A-I	APOA1_HUMAN
1560050	736281	1151690	428355	596695	631379	1483140	1420920	1006800	759904	274540	320776	186523	429950	426553	209311	+	2.7933	0.00148148	977522	307942	-1.66647	P02652	Apolipoprotein A-II	APOA2_HUMAN
5303240	5032160	3756390	2791860	4918070	5011110	3076280	3717800	3567480	7949040	403638	194682	84083.7	385239	293704	289009	+	5.07443	0	4512340	275059	-4.03606	P06727	Apolipoprotein A-IV	APOA4_HUMAN
220847	78223.5	161402	408108	149658	87318.4	104269	158135	247511	223063	17188.1	0	25109.8	43387.6	0	62025.3	+	2.75991	0.00142857	183853	24618.5	-2.90074	P02655	Apolipoprotein C-II	APOC2_HUMAN
114403	223661	118472	82129.5	175304	157342	173902	142712	75129.9	406217	27405.5	0	36856.1	37999.2	64560.1	33870	+	2.30811	0.00509091	166927	33448.5	-2.3192	P05090	Apolipoprotein D	APOD_HUMAN
714662	502023	695937	886651	436419	384091	482793	581082	1087320	1242190	74791.5	308819	120059	415045	503398	326224	+	2.15271	0.0074	701316	291389	-1.26712	P02649	Apolipoprotein E	APOE_HUMAN
31244.1	50090.8	77247.3	104897	38131.6	67301.5	48514	80158.1	61328.2	227773	7037.76	0	11768.6	25423.6	10161.8	19445.5	+	1.85284	0.0165833	78668.5	12306.2	-2.6764	O14791	Apolipoprotein L1	APOL1_HUMAN
34464.1	34938.4	36107.4	37983.9	39694.8	36567.3	31472.7	42878.6	46806.5	102011	47100.2	206393	45928.5	128266	129318	51868.2	+	1.70106	0.0236552	44292.5	101479	1.19605	O75882	Attractin	ATRN_HUMAN
22415.6	10804.7	22361.2	20729.9	24899	10708.7	23730	28321.9	20563.9	56595.5	77166	86327.1	26505.7	75302.5	90094.1	27985.2	+	2.74159	0.00151724	24113	63896.8	1.40593	P61769	Beta-2-microglobulin	B2MG_HUMAN
182867	153883	212371	207371	180555	111705	126217	196982	167771	88768.6	129617	586606	254471	195431	784243	275051	+	1.65001	0.0249524	162849	370903	1.18751	P02745	Complement C1q subcomponent subunit A	C1QA_HUMAN
674130	576002	990457	695402	667090	882141	1066600	749587	845473	1091960	674810	2251660	1526380	1625100	2321300	1751720	+	3.19218	0.000545455	823884	1691830	1.03807	P02747	Complement C1q subcomponent subunit C	C1QC_HUMAN
98148.5	78577	91838.6	116370	106559	91164.6	118777	135019	107001	210232	0	34361.8	30953.5	31146.6	77407.8	23724.2	+	3.54807	0.000222222	115369	32932.3	-1.80868	P20851	C4b-binding protein beta chain	C4BPB_HUMAN
16028.6	7668.61	17320.4	16450.6	11511	17711.7	15458	18018.6	10021.4	59871.7	2034.44	5949.42	3869.72	3002.64	0	3390.97	+	1.67327	0.0249333	19006.1	3041.2	-2.64375	P55290	Cadherin-13	CAD13_HUMAN
10973.6	6139.52	14413	16003.7	8194.25	6395.05	10421.5	15949.1	4240.59	8064.61	1227.61	0	3806.92	0	0	5901.31	+	3.15938	0.000695652	10079.5	1822.64	-2.46732	P12830	Cadherin-1	CADH1_HUMAN
28001.7	27201.8	47858.8	23938	24664.6	61862.5	54933.1	24424.5	15914.1	191646	0	0	5608.54	0	0	7418.76		1.36145	0.0584789	50044.5	2171.22	-4.52663	P33151	Cadherin-5	CADH5_HUMAN
205568	135067	208607	104974	97277.2	128789	261306	231397	246413	965613	316953	585212	484814	580276	1024170	546155	+	1.66217	0.0245806	258501	589596	1.18956	P15169	Carboxypeptidase N catalytic chain	CBPN_HUMAN
3004.24	11406.1	7490.71	2108.35	3807.88	12067.7	1278.82	7434.69	3152.72	28431.4	32472.7	97323.1	32149.7	35840.8	88620.6	39993	+	3.45923	0.0004	8018.27	54400	2.76224	Q13740	CD166 antigen	CD166_HUMAN
3503100	5905840	5932180	4386520	4744680	6170280	4707590	4262920	5340620	21819300	20225100	26477300	25091600	28226100	63136600	19854900	+	3.15239	0.000833333	6677300	30501900	2.19156	P00450	Ceruloplasmin	CERU_HUMAN
5042390	3303450	4323890	4304500	3293750	5136730	2984170	3751010	3666240	8997710	7129100	17161400	9923640	8177100	17774700	11728800	+	3.52014	0.000210526	4480380	11982500	1.41924	P00751	Complement factor B	CFAB_HUMAN
1963820	1783830	1770720	1409780	1331350	1922280	1233630	1546020	1577260	1651400	3027620	10289400	4126790	4222950	23883000	3966310	+	1.72418	0.0232	1619010	8252690	2.34975	P08603	Complement factor H	CFAH_HUMAN
576804	372945	278314	355062	385804	332005	346843	412306	481110	338158	518972	2820030	923404	2476610	10593900	1286320	+	1.45134	0.0439403	387935	3103210	2.99987	P05156	Complement factor I	CFAI_HUMAN
221967	161206	205119	194392	191330	163463	342795	201552	215373	444063	433349	868560	785626	998903	2615020	737521	+	2.41022	0.004	234126	1073160	2.19651	P06276	Cholinesterase	CHLE_HUMAN
114020	77299.4	55585.5	83715.7	43196.4	54433.2	57295.6	91931.1	63608.8	190991	17227.2	22653.4	6233.19	22088	40894.1	35354.4	+	2.20959	0.00655556	83207.7	24075	-1.78918	Q96KN2	Beta-Ala-His dipeptidase	CNDP1_HUMAN
9321.71	18291.6	11323.2	4577.11	10274.8	8086.2	13524.9	11630.4	10455	22748.5	42825.6	18478.4	43041.1	28799.8	0	30288.9	+	1.83777	0.01728	12023.3	27239	1.17984	Q12860	Contactin-1	CNTN1_HUMAN
252705	279336	326515	324867	270598	280349	325901	268645	267633	1315850	439195	12989900	549013	964257	9625210	568197		1.33274	0.05968	391240	4189300	3.42058	P06681	Complement C2	CO2_HUMAN
91126.9	155174	150491	141668	99797	92799.8	139370	76173.3	104801	201896	122509	1105030	176646	163421	610925	185571		1.34506	0.0582162	125330	394017	1.65253	P10643	Complement component C7	CO7_HUMAN
23056.6	26998.2	39253.5	36032.9	28261.8	40652.8	33028	23316.7	50612.8	22766.1	2208.18	0	3302.65	8960.43	0	31444.9	+	3.40537	0.000380952	32397.9	7652.69	-2.08186	P02748	Complement component C9	CO9_HUMAN
44901.4	47238.8	49679	32983.7	55976.9	22636.9	60799.7	64736.1	37315.9	121429	144311	163080	144740	93046	88911.2	161873	+	3.86718	0	53769.8	132660	1.30287	Q9NQ79	Cartilage acidic protein 1	CRAC1_HUMAN
30396.5	74413.2	106933	43190.4	108324	31016.4	95492.8	99479	50973	52367.6	116256	215196	220991	178306	376391	201992	+	3.7304	0.00025	69258.6	218189	1.65551	P09172	Dopamine beta-hydroxylase	DOPO_HUMAN
426670	282779	310147	278589	244498	268918	408534	305817	373177	743795	10294	78029.2	111991	115255	406183	58698.1	+	2.138	0.0075122	364292	130075	-1.48575	P00742	Coagulation factor X	FA10_HUMAN
41904.8	27134.7	47368.7	45479.7	21848.3	31807.2	33229.2	13310.1	33157.4	81230.5	68243.8	253909	69503.2	94707.2	373891	82937.3	+	2.0037	0.0105455	37647.1	157199	2.06198	P03951	Coagulation factor XI	FA11_HUMAN
15343.2	19331.2	18639.7	18808.8	18921.5	11515.5	17933.4	21924.3	26304.2	36665.1	27138.6	79282.5	55199.7	56468.3	78577.7	35120.3	+	3.55837	0.000235294	20538.7	55297.8	1.42888	P12259	Coagulation factor V	FA5_HUMAN
9177.47	12716.9	14853.1	10623.1	12971.8	9647.14	11922	14328.3	11234	18673	41076.9	68447.8	91003.9	56028.4	77305.7	55535.3	+	6.65179	0	12614.7	64899.7	2.36311	P08637	Low affinity immunoglobulin gamma Fc region receptor III-A	FCG3A_HUMAN
24549.4	26957.7	28648.3	14702	24688.8	8569.7	16933.6	20618.6	20418.9	110840	28432.5	149092	65945.4	50396	311322	42731.8		1.34769	0.0587945	29692.7	107987	1.86268	Q9Y6R7	IgGFc-binding protein	FCGBP_HUMAN
3794690	3128620	4002990	3974210	2750400	3077300	4079220	5276140	3420400	3407710	525773	1505690	1126110	1129940	3235870	1243900	+	4.04631	0	3691170	1461210	-1.33691	P02765	Alpha-2-HS-glycoprotein	FETUA_HUMAN
113398	55669.7	65857.1	30946.4	57909.8	86278.8	87971.4	112184	78819.1	155133	914638	3460010	1390740	1334930	189864	288814	+	2.20059	0.00642105	84416.7	1263170	3.90338	Q03591	Complement factor H-related protein 1	FHR1_HUMAN
18744.1	27910	55859.4	17647.7	49087.3	23054.4	18354.1	17602	18910.5	118804	88710	112336	45279.8	56261.1	121821	60003.5	+	1.74412	0.022717	36597.3	80735.3	1.14146	P02671	Fibrinogen alpha chain	FIBA_HUMAN
1098070	625240	465320	1000160	724394	742681	1178670	999046	1898760	2858700	140965	244349	162890	179378	197808	155975	+	2.27671	0.00537143	1159100	180228	-2.68511	P02751	Fibronectin	FINC_HUMAN
302647	282378	488220	352688	251369	366752	336177	313940	365232	478434	50353.3	65386.6	30996.4	52697.3	81017	50216.3	+	6.58122	0	353784	55111.1	-2.68245	P06396	Gelsolin	GELS_HUMAN
16799.3	16579.6	11950.5	11697.1	11272.6	18117	12358.7	14073.9	8922.54	32976.6	91787.1	115439	55407.1	178549	274287	134437	+	3.93077	0	15474.8	141651	3.19435	Q92820	Gamma-glutamyl hydrolase	GGH_HUMAN
461271	170682	152091	459957	306876	233435	205515	256032	264907	171936	425255	2735240	555500	4699060	5835570	661656	+	2.07001	0.00904762	268270	2485380	3.21171	P69905	Hemoglobin subunit alpha	HBA_HUMAN
410921	204747	89600.1	364520	370414	227078	223534	194292	253105	1283930	376855	1405180	734036	5552930	4025920	748437	+	1.71337	0.0235714	362214	2140560	2.56307	P68871	Hemoglobin subunit beta	HBB_HUMAN
10327700	7075100	9560430	8313150	8584090	12653200	13090300	10757000	9006630	517884	34886900	35398400	24201400	45329500	45420500	36801600	+	6.96158	0	8988550	37006400	2.04161	P02790	Hemopexin	HEMO_HUMAN
294311	108641	305713	323493	222254	205350	422385	308101	578044	1069880	34963.8	57854	16677.2	57692.4	154546	66934.3	+	1.85392	0.0168511	383818	64778	-2.56685	P05546	Heparin cofactor 2	HEP2_HUMAN
345914	169131	122849	155752	297389	373207	361645	211059	192456	110623	24544.4	118172	43962.6	85221.4	266539	61657.6	+	1.74831	0.023	234003	100016	-1.2263	P04196	Histidine-rich glycoprotein	HRG_HUMAN
62420.7	59183.5	41610.7	53601	64384.1	50311.6	61420.6	84897.3	59273.1	132986	118327	323042	121161	182659	322342	133232	+	3.01819	0.00128	67008.9	200127	1.57849	P22692	Insulin-like growth factor-binding protein 4	IBP4_HUMAN
24736.2	21336.2	25485.7	29386.9	39079.4	62267.1	48950	40088.7	15937.1	71650.1	44926.4	115159	93365.1	45544.3	86387.7	70367.1	+	2.29954	0.00505882	37891.8	75958.3	1.00332	P24593	Insulin-like growth factor-binding protein 5	IBP5_HUMAN
281511	250276	146201	234333	198610	164044	236297	293245	329802	704276	609897	2517400	1036980	712699	5410840	607342	+	1.66913	0.0246557	283859	1815860	2.67741	P03952	Plasma kallikrein	KLKB1_HUMAN
245032	181440	170822	92335.2	135757	121038	340637	280633	442156	82028.3	220887	0	77443.8	65701	0	126481	+	1.44559	0.0440588	209188	81752.2	-1.35547	P01625	Ig kappa chain V-IV region Len	KV402_HUMAN
73904.4	61283.8	85114.7	55123.8	45442.8	84334.5	101079	48623.4	58352.7	45559.8	25359.6	0	15012.3	15667.5	0	9283.54	+	4.81248	0	65881.9	10887.2	-2.59725	O00187	Mannan-binding lectin serine protease 2	MASP2_HUMAN
20800.5	115931	74823.8	48980.2	10409.1	30606.7	81094.2	17938.4	61168.3	412503	686050	284086	464608	140710	1505660	91197.7	+	1.67827	0.0249492	87425.5	528718	2.59637	P11226	Mannose-binding protein C	MBL2_HUMAN
40828.6	56210.9	61896.1	4950.62	11697.3	31965.5	657024	36505.7	6803.44	80462.7	11189.9	1510870	1466290	1736040	11697100	5300870	+	1.70424	0.0236491	98834.5	3620390	5.19499	P04220	Ig mu heavy chain disease protein	MUCB_HUMAN
23692.7	39841.8	41183.2	25992.5	24995	51555.8	71180.4	44698.1	51438	170628	3662.09	0	0	0	0	0	+	2.02295	0.0101395	54520.6	610.348	-6.48103	Q15166	Serum paraoxonase/lactonase 3	PON3_HUMAN
69759.3	51604	103779	80981	108606	350888	64230	71793.6	144347	213484	215272	1054830	192045	314773	1784270	265493	+	1.60133	0.0286875	125947	637782	2.34025	P27918	Properdin	PROP_HUMAN
92306.7	91495.2	90042.5	111222	97823	76940.7	109431	119157	124503	64713.4	16162.2	48020.5	37638.4	26658.4	0	37110.6	+	5.51338	0	97763.5	27598.3	-1.82472	P07225	Vitamin K-dependent protein S	PROS_HUMAN
17994	15422.2	21057.8	16876.6	10717.9	26966.1	16117.3	22041.2	14881.2	92335.5	32077.9	125125	36112.6	46408.4	126098	29651.2	+	1.44224	0.0438261	25441	65912.2	1.37339	Q6UX71	Plexin domain-containing protein 2	PXDC2_HUMAN
16815.2	15034.2	15743.2	21588.1	16042.3	16762.6	24007.4	16427.3	11793	48699.3	33658.3	164199	49145.1	44684.3	0	83918.1	+	1.46795	0.041697	20291.3	62600.8	1.62532	P01033	Metalloproteinase inhibitor 1	TIMP1_HUMAN
9512280	11276900	9458330	8236780	8342360	11189500	9246430	12299500	7514650	25023500	29006200	64193700	26599300	29889400	99339200	35665600	+	2.83482	0.00153846	11210000	47448900	2.08159	P02774	Vitamin D-binding protein	VTDB_HUMAN
6016230	3980150	5868690	5701670	3767380	6239520	3387270	2143210	5700550	2817400	403529	768466	708484	837728	513138	707342	+	4.66024	0	4562210	656448	-2.79698	P04004	Vitronectin	VTNC_HUMAN

## Sheet: MTC_HC_change
52	53	54	55	56	57	58	59	60	61	C: Student's T-test Significant HC_MC	N: -Log Student's T-test p-value HC_MC	FDR value	N: Mean HC	N: Mean MC	ratio_MC/HC	T: SAMPLENAME	T: PG.ProteinDescriptions	T: PG.ProteinGroups
3357480	1627470	5460830	3951330	679993	2482000	11326100	2688240	4723690	2491680	+	1.52139	0.0186909	1587860	3878880	1.28856	P01009	Alpha-1-antitrypsin	A1AT_HUMAN
2825720	2690300	6019210	4287510	5136340	2701730	10666200	2820230	6420800	4751310	+	2.21048	0.00227907	1953850	4831940	1.30628	P02750	Leucine-rich alpha-2-glycoprotein	A2GL_HUMAN
0	902.304	0	252.216	0	0	0	0	424.935	0	+	7.13229	0	3453.72	157.946	-4.45065	P05067	Amyloid beta A4 protein	A4_HUMAN
23877900	27060400	33442600	23851000	4673790	21541000	56000100	33061100	35545300	32672000	+	3.71682	0	8992630	29172500	1.69779	P01011	Alpha-1-antichymotrypsin	AACT_HUMAN
36921.8	27957.1	37734.7	61853.3	16205.4	24372	42386.8	44779.5	30548.3	30117.7	+	3.76168	0	15403.4	35287.7	1.19592	P15144	Aminopeptidase N	AMPN_HUMAN
3049250	4701960	3416490	2805090	1923810	3411880	2869720	2022800	4871420	4786300	+	6.19843	0	13992000	3385870	-2.047	P02647	Apolipoprotein A-I	APOA1_HUMAN
317207	341691	301497	380501	259360	323867	209483	291458	373856	405299	+	4.07553	0	977522	320422	-1.60916	P02652	Apolipoprotein A-II	APOA2_HUMAN
580890	378383	381744	238036	294061	284070	215688	265951	372803	923850	+	7.06369	0	4512340	393548	-3.51926	P06727	Apolipoprotein A-IV	APOA4_HUMAN
55305.7	37580.2	61588.4	47364	17035.2	85990.3	64928	50916.9	45638.6	148436	+	2.79901	0.000380952	183853	61478.3	-1.5804	P02655	Apolipoprotein C-II	APOC2_HUMAN
104104	111696	58280.7	49083.8	122731	50595.4	57475.5	108338	78647.9	68564.1	+	1.86359	0.00675269	166927	80951.7	-1.04408	P05090	Apolipoprotein D	APOD_HUMAN
37488.7	50507.7	22424.2	26721.7	41014.8	35058.3	34871.4	51646.8	39823.6	49168.9	+	1.37379	0.0283871	78668.5	38872.6	-1.01703	O14791	Apolipoprotein L1	APOL1_HUMAN
22750.6	39409	56160.9	37580.5	32831.9	28183.3	20089.3	96458.1	22457.5	23114.1	+	3.19606	0.000272727	78725.7	37903.5	-1.0545	O95445	Apolipoprotein M	APOM_HUMAN
413600	437514	357508	386448	849179	277598	327422	328506	301569	238370	+	3.16455	0.000266667	162849	391771	1.26648	P02745	Complement C1q subcomponent subunit A	C1QA_HUMAN
2479370	2011980	2817220	2132580	4164240	1267780	1720060	2296840	2212890	1502600	+	4.46894	0	823884	2260560	1.45617	P02747	Complement C1q subcomponent subunit C	C1QC_HUMAN
49268.1	31371.5	38930.1	16514.3	183708	22027.2	35480.7	48856.2	56584.2	35974.7	+	2.41515	0.0012	115369	51871.5	-1.15324	P20851	C4b-binding protein beta chain	C4BPB_HUMAN
10934.7	7009.05	7940.85	4407.89	6633.71	7826.27	4861.94	11589.8	11698.4	9587.88	+	1.44181	0.0230083	19006.1	8249.05	-1.20416	P55290	Cadherin-13	CAD13_HUMAN
22029.5	9611.47	8329.89	8521.3	12845.3	8178.06	5428.2	0	21155	5768.5	+	1.56288	0.0162593	50044.5	10186.7	-2.29652	P33151	Cadherin-5	CADH5_HUMAN
166505	128102	187413	1087310	36281.7	226902	989352	488163	263778	611937	+	2.16933	0.00274157	60921	418574	2.78047	P00915	Carbonic anhydrase 1	CAH1_HUMAN
32253.9	39561.2	47323.4	53779.1	31642.5	31927.3	54978.8	52177.3	22441.6	16198	+	3.13833	0.000255319	17519	38228.3	1.12572	Q9NTU7	Cerebellin-4	CBLN4_HUMAN
599419	714963	757904	554218	497213	636527	508437	969355	577051	472766	+	3.02189	0.000296296	258501	628785	1.2824	P15169	Carboxypeptidase N catalytic chain	CBPN_HUMAN
29472.8	16012.5	36944.6	30074.6	26399	13472.5	20714.9	21745.5	24459.4	14264.5	+	3.42347	0.000324324	8018.27	23356	1.54243	Q13740	CD166 antigen	CD166_HUMAN
2846490	2148500	3776450	3566370	5289270	2699520	3208520	3447000	3337720	3496460	+	5.35343	0	1619010	3381630	1.06261	P08603	Complement factor H	CFAH_HUMAN
1006390	774797	1396040	839768	1691530	853451	1275330	785715	1148810	1100820	+	5.88058	0	387935	1087270	1.48682	P05156	Complement factor I	CFAI_HUMAN
54928.1	83340.4	44056.6	32663.6	7320.73	50606	21220.8	17091.5	46370.6	40587.9	+	1.95226	0.00495652	83207.7	39818.6	-1.06327	Q96KN2	Beta-Ala-His dipeptidase	CNDP1_HUMAN
33874.7	23592	24555.3	31161.6	36692.8	23197.1	27177.7	17587.8	23584.3	16530.3	+	4.23607	0	12023.3	25795.4	1.10128	Q12860	Contactin-1	CNTN1_HUMAN
26485	16984	14902.8	11578.6	15165.4	11299.4	614.847	148.751	23513.9	19606.9	+	1.40905	0.0257377	53479.8	14030	-1.93048	P49747	Cartilage oligomeric matrix protein	COMP_HUMAN
164464	138931	164902	146616	267159	112659	68565.8	137991	163441	98713.1	+	3.96879	0	53769.8	146344	1.4445	Q9NQ79	Cartilage acidic protein 1	CRAC1_HUMAN
195255	99590.7	297394	219552	205132	77026	165154	236970	188950	173425	+	3.85269	0	81633.5	185845	1.18687	P01034	Cystatin-C	CYTC_HUMAN
76706.1	36217.4	92889.4	62650.4	144833	48418.4	30134.3	71501.1	50560.7	37618.8	+	3.24931	0.00027907	17529.3	65152.9	1.89406	Q01459	Di-N-acetylchitobiase	DIAC_HUMAN
258346	259003	144098	169893	15703.5	228650	92045.2	79397.9	198881	277748	+	2.6339	0.000628571	364292	172377	-1.07953	P00742	Coagulation factor X	FA10_HUMAN
75185.9	50022.8	114124	25671.5	85393.2	20457.2	30167.3	69295.1	30268.9	66361.6	+	2.7316	0.000484848	20538.7	56694.7	1.46487	P12259	Coagulation factor V	FA5_HUMAN
25862.5	20445.3	35811	43959.1	138471	34144.4	17781.8	36194.8	18905.1	16459.3	+	1.45265	0.0222	12614.7	38803.5	1.62108	P08637	Low affinity immunoglobulin gamma Fc region receptor III-A	FCG3A_HUMAN
242055	133389	785209	65248.2	428266	156622	222451	201505	138197	156836	+	1.64827	0.0126154	84416.7	252978	1.58341	Q03591	Complement factor H-related protein 1	FHR1_HUMAN
546184	249178	156611	290964	192992	459145	225973	278420	482407	410456	+	2.6887	0.000647059	1159100	329233	-1.81582	P02751	Fibronectin	FINC_HUMAN
139177	270547	172658	82672.6	21580	107461	71096.2	259963	206390	89398.6	+	4.84316	0	353784	142094	-1.31602	P06396	Gelsolin	GELS_HUMAN
53235.1	29604.6	157981	79237.6	88989.8	40695.5	47121.9	58574.3	89700.3	38029.4	+	3.39344	0.000315789	15474.8	68317	2.14232	Q92820	Gamma-glutamyl hydrolase	GGH_HUMAN
6664.37	7382.4	4954.65	38112.4	0	8088.14	10981.3	3238.17	8006.2	9515.7	+	1.6708	0.0118824	22955.4	9694.33	-1.24362	Q14520	Hyaluronan-binding protein 2	HABP2_HUMAN
19668900	19113900	26602300	19965200	26909600	14211500	21366600	20873000	21932800	23183700	+	6.35709	0	8988550	21382700	1.25028	P02790	Hemopexin	HEMO_HUMAN
88197.1	372033	237399	97830	40600.5	207740	113758	226283	265760	205257	+	1.35396	0.0294488	383818	185486	-1.04911	P05546	Heparin cofactor 2	HEP2_HUMAN
67791.5	53921.9	109498	84728.5	151340	62068.6	80536.7	60070.2	54957.9	46840.2	+	2.89899	0.000327869	37074.4	77175.4	1.05772	P26927	Hepatocyte growth factor-like protein	HGFL_HUMAN
308152	386423	496754	192619	349494	222884	432554	525927	374167	397278	+	5.91668	0	113926	368625	1.69406	P17936	Insulin-like growth factor-binding protein 3	IBP3_HUMAN
104421	158406	127605	51603.9	117614	153268	51398.1	91790.6	51233.5	113163	+	3.63676	0	37891.8	102050	1.42932	P24593	Insulin-like growth factor-binding protein 5	IBP5_HUMAN
1542520	1642770	1459700	755244	102329	1460520	1104650	1979020	902830	877347	+	2.20689	0.00229885	572797	1182690	1.04598	P19827	Inter-alpha-trypsin inhibitor heavy chain H1	ITIH1_HUMAN
139656	129636	176296	79127.9	24731.8	86119.5	172419	145879	144655	48599.6	+	2.40535	0.00118519	56462.9	114712	1.02264	Q06033	Inter-alpha-trypsin inhibitor heavy chain H3	ITIH3_HUMAN
473938	467156	411484	577298	1736300	301053	287810	431570	54783	225854	+	1.6432	0.0126857	120684	496724	2.04121	P04434	Ig kappa chain V-III region VH (Fragment)	KV310_HUMAN
547114	817661	567819	710190	1794420	566712	662381	202178	563855	177711	+	1.46528	0.0214118	305478	661004	1.11359	P04211	Ig lambda chain V region 4A	LV001_HUMAN
236587	124875	312081	332873	808171	95829.7	354767	398874	192542	120455	+	3.03055	0.000301887	36479.1	297705	3.02874	P61626	Lysozyme C	LYSC_HUMAN
7863.73	4953.1	0	8358.82	0	11831.8	0	0	13618.5	7957.97	+	3.07047	0.00032	31106.9	5458.4	-2.51068	P33908	Mannosyl-oligosaccharide 1,2-alpha-mannosidase IA	MA1A1_HUMAN
35076.4	20462.1	29970.1	49232.1	0	18250.1	45598.2	18059.7	35239.3	48185.6	+	3.60164	0	65881.9	30007.4	-1.13456	O00187	Mannan-binding lectin serine protease 2	MASP2_HUMAN
2271560	6660590	2369470	3255570	5191050	1960360	3683420	6815530	4457130	1272060	+	4.92227	0	98834.5	3793670	5.26244	P04220	Ig mu heavy chain disease protein	MUCB_HUMAN
34318.7	34235.5	51271.9	17957	33604.4	18926.3	39361.8	65922.6	41059.6	31382.2	+	3.66245	0	125988	36804	-1.77535	P27169	Serum paraoxonase/arylesterase 1	PON1_HUMAN
0	0	0	0	0	0	0	0	0	15324.4	+	2.92349	0.000333333	54520.6	1532.44	-5.1529	Q15166	Serum paraoxonase/lactonase 3	PON3_HUMAN
38763.1	20078.1	51196.1	33143.1	41808.2	24512.5	19267.5	34782.8	29277.9	27332.4	+	4.72855	0	13126.3	32016.2	1.28634	Q12913	Receptor-type tyrosine-protein phosphatase eta	PTPRJ_HUMAN
45102.4	44941.2	65962.9	42520.5	87813	17835.6	86135.4	51375.4	40323.9	62135.2	+	3.55592	0.000342857	20291.3	54414.5	1.42313	P01033	Metalloproteinase inhibitor 1	TIMP1_HUMAN
23128	15527.7	38342.7	5060.2	11140	16621.8	13243.1	27360.2	7302.06	17897.1	+	2.9517	0.000344828	38592	17562.3	-1.13582	P07996	Thrombospondin-1	TSP1_HUMAN
1262560	1568420	1212670	884855	536127	1232410	1432070	859263	2386770	1962460	+	5.27097	0	4562210	1333760	-1.77423	P04004	Vitronectin	VTNC_HUMAN
6118.9	8546.58	4497.7	4047.84	2105.47	4506	3829.81	7093.13	4227.91	5570.21	+	5.87885	0	527.159	5054.36	3.26122	P04745;P19961;P04746	Alpha-amylase 1;Alpha-amylase 2B;Pancreatic alpha-amylase	AMY1_HUMAN;AMY2B_HUMAN;AMYP_HUMAN
39287.1	88124.4	65295.1	83793.3	143734	37010.7	7033.48	32918.4	62610.1	10982.2	+	1.47	0.0215726	20721.1	57078.8	1.46185	Q86VB7	Scavenger receptor cysteine-rich type 1 protein M130	C163A_HUMAN
20299.7	15286.9	35459.3	76951.4	33668.5	17267.5	55227.7	34736.3	18451.3	29850.4	+	3.08041	0.000333333	7974.01	33719.9	2.08022	P04040	Catalase	CATA_HUMAN
10120.4	5645.43	14606	33644.7	24073.8	6415.8	5568.03	6444.75	9580.62	14998	+	2.58846	0.000712329	2560.02	13109.7	2.35641	P07339	Cathepsin D	CATD_HUMAN
9759.01	9620	24347.8	12891.6	17633.6	4091.55	13918.6	22823.8	11895.1	10658.8	+	4.16314	0	2313.4	13764	2.57281	P07711	Cathepsin L1	CATL1_HUMAN
13779.8	9006.09	23021	12553.5	14275.7	9434.86	6118.28	5432.62	4721.21	6391.64	+	3.60202	0	2048.18	10473.5	2.35433	Q9Y646	Carboxypeptidase Q	CBPQ_HUMAN
73822.1	38295.3	95517.2	69123.1	105480	44033.5	52208.7	68015.2	56567.4	55595.6	+	4.64155	0	23556.3	65865.8	1.48342	P16070	CD44 antigen	CD44_HUMAN
14424.6	17973.4	22067.2	36733.1	37974.9	14443.4	10871.3	7631.51	21219.5	10625.7	+	3.29727	0.000292683	4763.65	19396.4	2.02565	Q9NZK5	Adenosine deaminase CECR1	CECR1_HUMAN
63639.7	20720.7	38877.9	77309.5	96079.3	26607.6	26153.5	47305.8	49103.4	139038	+	2.50064	0.000779221	16414.9	58483.6	1.83303	Q9UNN8	Endothelial protein C receptor	EPCR_HUMAN
27087	21903.7	76925.4	18868.8	41309.4	20390.5	12267	8982.03	31033.6	7767.64	+	2.39829	0.00126829	4676.03	26653.5	2.51097	P00488	Coagulation factor XIII A chain	F13A_HUMAN
5371.81	4261.97	805.355	382.529	1216.65	2862.27	5616.88	5860.23	5706.19	4604.35	+	3.03388	0.000307692	12942.6	3668.82	-1.81874	P00740	Coagulation factor IX	FA9_HUMAN
85880.8	62524.4	85789.6	57183.2	106713	63720.3	48978.8	99187.5	133843	37757.4	+	2.77194	0.000375	37533.3	78157.7	1.05822	Q9UGM5	Fetuin-B	FETUB_HUMAN
76598.5	79448.2	67870.9	44917.7	191509	8915.58	53004	71248.2	67500.2	49532.6	+	1.76249	0.00925253	26708.1	71054.5	1.41165	P18065	Insulin-like growth factor-binding protein 2	IBP2_HUMAN
41370.9	25481	50673.2	77722.2	126285	22002.4	32198.3	64650.3	28652.6	35131.8	+	2.77187	0.000369231	12376.8	50416.8	2.02627	Q16270	Insulin-like growth factor-binding protein 7	IBP7_HUMAN
36574.6	17240	21298.1	37568.4	34797.7	13019.4	14908.2	23618.8	27806.4	25535.8	+	5.1266	0	6437.09	25236.8	1.97105	P05362	Intercellular adhesion molecule 1	ICAM1_HUMAN
47816.2	43270	71872.7	63462.4	102768	35418.5	55694.6	45970	36146.6	44609.6	+	4.64599	0	16225.5	54702.9	1.75335	P13598	Intercellular adhesion molecule 2	ICAM2_HUMAN
33004.4	19392.6	73222.9	35348.3	75278.7	20782.9	30867.4	24521.8	39931.5	20063.1	+	2.92624	0.000338983	10731.2	37241.4	1.7951	P32942	Intercellular adhesion molecule 3	ICAM3_HUMAN
16108	9982.38	10682.9	10132.3	16653.9	8536.79	10076.6	12151.1	10215.3	14840	+	3.639	0	5340.54	11937.9	1.16049	P11279	Lysosome-associated membrane glycoprotein 1	LAMP1_HUMAN
15004.1	7143.73	14294.2	14863.5	23790	10695.2	7922.51	11610.8	9736.99	11262.2	+	3.15201	0.00026087	5186.99	12632.3	1.28415	Q07954	Prolow-density lipoprotein receptor-related protein 1	LRP1_HUMAN
98208.4	98649.6	119725	173334	226972	161756	165711	176632	84186.7	73020.4	+	3.04765	0.000313725	64505	137819	1.09529	P14151	L-selectin	LYAM1_HUMAN
41022.1	22817.8	41948.7	102470	136551	22654.8	68431.4	55318.8	22541.9	49015.1	+	2.5878	0.000702703	13854.9	56277.1	2.02215	Q9Y5Y7	Lymphatic vessel endothelial hyaluronic acid receptor 1	LYVE1_HUMAN
6788.18	4823.17	3949.56	4089.51	9146	1858.79	6054.63	5825.68	5203.74	4383.62	+	4.0647	0	1513.38	5212.29	1.78414	P11717	Cation-independent mannose-6-phosphate receptor	MPRI_HUMAN
31723.8	9492.38	26833.8	21286	57558.5	18173.5	6894.21	24861.4	19214	18537	+	2.48515	0.000923077	7567.45	23457.5	1.63217	Q15113	Procollagen C-endopeptidase enhancer 1	PCOC1_HUMAN
9878.48	6890.32	5569.36	6601.76	19872.2	7944.07	10810.2	9539.98	4129.73	3410.14	+	3.26755	0.000285714	1858.99	8464.62	2.18693	P98160	Basement membrane-specific heparan sulfate proteoglycan core protein	PGBM_HUMAN
96802.2	39468.8	125658	111845	179945	41370.2	24713.8	59138.1	77083.6	62089.1	+	2.13185	0.00288889	34039.2	81811.4	1.2651	Q6UXB8	Peptidase inhibitor 16	PI16_HUMAN
13496.7	14485.5	19153.5	55977.8	12710.4	12972.7	61700.9	48349.4	18406	26175.9	+	2.88774	0.000322581	4533.3	28342.9	2.64435	P32119	Peroxiredoxin-2	PRDX2_HUMAN
28135.2	19965.7	50146.5	24208.6	78729.4	18165.1	25328	25502.1	28282.9	23715.9	+	2.96078	0.000280702	8029.02	32217.9	2.00457	Q92954	Proteoglycan 4	PRG4_HUMAN
19128.6	13705.2	23565.2	7166.43	10566	5514.54	28259.3	23071.3	4195.14	3138.74	+	1.66111	0.012233	4314.69	13831.1	1.68059	P07737	Profilin-1	PROF1_HUMAN
13260.6	6223.24	7595.03	6933.02	3703.48	5457.61	6051.9	6707.75	5606.27	5212.15	+	2.7009	0.000656716	3140.87	6675.11	1.08763	P23470	Receptor-type tyrosine-protein phosphatase gamma	PTPRG_HUMAN
20103.8	6511.48	10301.6	11779.9	16238.2	9348.16	7742.29	13923.6	11000.2	7922.25	+	4.49049	0	2794.48	11487.2	2.03938	P28827	Receptor-type tyrosine-protein phosphatase mu	PTPRM_HUMAN
17844.6	18177.2	18201.2	29899.6	10885.4	1393.45	20752.5	36731.4	4844.13	7015.02	+	1.53444	0.0180183	7780.67	16574.5	1.091	P06702	Protein S100-A9	S10A9_HUMAN
28858.5	7908.9	48878.5	43112.5	22277.2	8708.03	25598	14696.8	5219.5	12266.4	+	3.30189	0.0003	1158.93	21752.4	4.23031	Q13228	Selenium-binding protein 1	SBP1_HUMAN
16331	10367.2	9236.33	7486.17	18771.1	7530.94	13324	8954.56	8991.42	10376.3	+	5.77268	0	1594.64	11136.9	2.80405	P78324;Q5TFQ8	Tyrosine-protein phosphatase non-receptor type substrate 1;Signal-regulatory protein beta-1 isoform 3	SHPS1_HUMAN;SIRBL_HUMAN
5796.4	2964.89	8263.14	24251.6	4684.95	3769.53	33531.7	7207.62	4117.82	7994.17	+	1.80057	0.00808333	1268.02	10258.2	3.01613	P00441	Superoxide dismutase [Cu-Zn]	SODC_HUMAN
3852.57	3081.93	2138.71	3437.97	1626.79	2898.47	3791.27	1620.05	1305.51	1951.75	+	2.23363	0.00207059	7072.92	2570.5	-1.46026	P08294	Extracellular superoxide dismutase [Cu-Zn]	SODE_HUMAN
30278.6	23228.7	33101.4	23116.4	19313.9	13847.4	17351.4	22883.7	22801.7	14977.7	+	4.2036	0	9068.95	22090.1	1.28439	Q7Z7G0	Target of Nesh-SH3	TARSH_HUMAN
41460.8	13783.7	64099.4	10287.9	20927.8	6120.12	82595.1	78822.8	28765.3	3959.34	+	2.54383	0.0008	2097.16	35082.2	4.06423	P02788	Lactotransferrin	TRFL_HUMAN

## Sheet: PTC_HC_change
16	17	18	19	20	21	22	23	24	25	33	34	35	36	37	38	39	40	41	42	43	44	45	C: Student's T-test Significant HC_PTC	N: -Log Student's T-test p-value HC_PTC	FDR value	N: Mean HC	N: Mean PTC	ratio_PTC/HC	T: SAMPLENAME	T: PG.ProteinDescriptions	T: PG.ProteinGroups
4040.7	3132.62	2147.86	4446.49	5839.19	1934.07	2879.76	3953.84	2820.86	3341.85	0	0	0	340.804	0	0	842.982	935.147	0	0	0	0	0	+	8.53061	0	3453.72	162.995	-4.40525	P05067	Amyloid beta A4 protein	A4_HUMAN
6360450	9020760	8443460	8377330	8404450	8108590	8224270	7149310	5364240	20473400	16065000	34547200	24994000	22675400	23639700	34646600	30357700	25318900	36950200	17363500	18435900	23320300	33757700	+	6.04405	0	8992630	26313200	1.54897	P01011	Alpha-1-antichymotrypsin	AACT_HUMAN
62068700	83391200	144724000	116511000	123946000	146807000	102071000	162889000	89281100	147933000	31100900	71822100	33228700	30032100	40873900	28475600	39118800	58515900	86980900	29143700	19109300	35265900	27013700	+	6.15341	0	117962000	40821600	-1.53092	P02768	Serum albumin	ALBU_HUMAN
12358.5	22519.2	15965.7	13815.2	9447.65	18261.6	18068.3	19905.1	12644.7	11047.7	21570.7	51437.1	75280.6	35583.4	40386.5	34884.1	38146.2	18824.9	66125.8	29540.4	26835	25418.1	34338.6	+	3.38981	0.000131148	15403.4	38336.3	1.31546	P15144	Aminopeptidase N	AMPN_HUMAN
11070800	17372500	10086100	12545800	21825100	10905200	19869400	12442300	14783100	9020170	12563000	1092590	917096	2009290	2659020	4441480	1960130	5725500	1286600	3134530	2526580	2223510	1353450	+	6.11088	0	13992000	3222520	-2.11834	P02647	Apolipoprotein A-I	APOA1_HUMAN
1560050	736281	1151690	428355	596695	631379	1483140	1420920	1006800	759904	739670	151389	296568	217254	363002	248723	215080	404780	91856	388826	441762	552009	250606	+	4.35027	0	977522	335502	-1.54281	P02652	Apolipoprotein A-II	APOA2_HUMAN
5303240	5032160	3756390	2791860	4918070	5011110	3076280	3717800	3567480	7949040	8479080	106383	108279	122742	274076	167652	214875	320539	424170	390389	347008	270954	236603	+	3.54485	0	4512340	881750	-2.35543	P06727	Apolipoprotein A-IV	APOA4_HUMAN
676544	696855	510665	742578	487985	422938	626182	728224	1212550	3088030	521187	395548	181849	319433	477280	636228	154008	519706	338701	360255	502005	605583	241121	+	1.50037	0.0197419	919255	404069	-1.18586	P04114	Apolipoprotein B-100	APOB_HUMAN
220847	78223.5	161402	408108	149658	87318.4	104269	158135	247511	223063	40446.1	33106.2	32841.5	25172.9	38029.6	70254.8	41213.2	66120.5	68463.9	41054.9	52536	67029.5	75453.5	+	4.07628	0	183853	50132.5	-1.87473	P02655	Apolipoprotein C-II	APOC2_HUMAN
114403	223661	118472	82129.5	175304	157342	173902	142712	75129.9	406217	77327.2	16322.6	41616	15637.8	25292.3	70012.6	41235.6	78441.3	53085.3	55532.5	25388.3	63747.8	20818.8	+	3.67497	0	166927	44958.3	-1.89256	P05090	Apolipoprotein D	APOD_HUMAN
31244.1	50090.8	77247.3	104897	38131.6	67301.5	48514	80158.1	61328.2	227773	20589	43217.4	18471.9	48585.8	36338	81009.1	28139.8	47148.3	27664.9	32201	19030.5	43053.2	33481.6	+	1.71371	0.0106014	78668.5	36840.8	-1.09448	O14791	Apolipoprotein L1	APOL1_HUMAN
981428	733466	1262870	947524	991200	1169570	885513	755422	931861	3042570	1722250	388652	336418	468995	544874	579832	311939	532831	278706	708908	687998	576626	409277	+	1.84792	0.00746667	1170140	580562	-1.01116	P09871	Complement C1s subcomponent	C1S_HUMAN
98148.5	78577	91838.6	116370	106559	91164.6	118777	135019	107001	210232	166678	43558	26441.2	32835.9	28270.7	33625.1	3312.73	26165.3	104159	25269.2	33493.3	14556.6	20756.3	+	3.37097	0.000126984	115369	43009.4	-1.42353	P20851	C4b-binding protein beta chain	C4BPB_HUMAN
16028.6	7668.61	17320.4	16450.6	11511	17711.7	15458	18018.6	10021.4	59871.7	16420.8	2831.62	3292.19	3285.9	5050.53	4033.91	5019.13	8942.7	4036.51	9315.48	15771.4	5606.77	4585.03	+	1.99415	0.00536508	19006.1	6783.99	-1.48626	P55290	Cadherin-13	CAD13_HUMAN
10973.6	6139.52	14413	16003.7	8194.25	6395.05	10421.5	15949.1	4240.59	8064.61	16523.5	3395.63	1717.71	0	7639.15	7860.43	2978.53	3284.41	2221.91	4212.48	4925.29	0	0	+	2.34772	0.00196491	10079.5	4212.23	-1.25877	P12830	Cadherin-1	CADH1_HUMAN
28001.7	27201.8	47858.8	23938	24664.6	61862.5	54933.1	24424.5	15914.1	191646	92069.7	12550.1	0	0	14287.6	0	9958.5	13457.4	15656.6	3038.64	10904.5	0	0	+	1.45846	0.0223694	50044.5	13224.8	-1.91997	P33151	Cadherin-5	CADH5_HUMAN
86417.2	45588.2	46943.3	120321	49400.4	69311.4	27116	37646.7	40182.5	86283.6	129478	169452	292076	283036	386632	114482	153604	98315.4	94683.2	104051	115905	120691	40813.2	+	2.29274	0.00247458	60921	161786	1.40908	P00915	Carbonic anhydrase 1	CAH1_HUMAN
9264.28	14328.9	15746.2	10487.2	13831.7	27803.1	9913.63	21414.4	16014.8	36385.5	12902.9	76401	51356	46341.1	43933	50443	50850.9	29923.8	26946.1	37615.9	36408.1	104819	62475.6	+	3.16011	0.00025974	17519	48493.6	1.46887	Q9NTU7	Cerebellin-4	CBLN4_HUMAN
3004.24	11406.1	7490.71	2108.35	3807.88	12067.7	1278.82	7434.69	3152.72	28431.4	17752	21391.2	19546	15628.6	24419.5	14846.1	21270.4	19648.8	18591.5	24702.8	32624.1	32004	33133.2	+	4.12367	0	8018.27	22735.2	1.50356	Q13740	CD166 antigen	CD166_HUMAN
3503100	5905840	5932180	4386520	4744680	6170280	4707590	4262920	5340620	21819300	10477900	17117100	24106400	18808500	16931500	18725100	17556700	12532100	19977300	13417100	15045900	15635100	21920800	+	4.68983	0	6677300	17096300	1.35635	P00450	Ceruloplasmin	CERU_HUMAN
576804	372945	278314	355062	385804	332005	346843	412306	481110	338158	303793	1351160	2930290	1972660	2735680	1194430	1255610	989172	2041640	711337	877997	326754	710158	+	2.68412	0.000646465	387935	1338510	1.78674	P05156	Complement factor I	CFAI_HUMAN
221967	161206	205119	194392	191330	163463	342795	201552	215373	444063	148092	1047000	881901	286178	628578	411244	431518	376669	696204	277327	249056	381106	349225	+	1.91228	0.00633333	234126	474161	1.01809	P06276	Cholinesterase	CHLE_HUMAN
114020	77299.4	55585.5	83715.7	43196.4	54433.2	57295.6	91931.1	63608.8	190991	84211.6	22219.8	13437.6	29883.4	42160.1	19288.4	20477.3	14303.8	16278.8	43163.2	36996	37152	20284.7	+	3.09497	0.00025	83207.7	30758.2	-1.43575	Q96KN2	Beta-Ala-His dipeptidase	CNDP1_HUMAN
9321.71	18291.6	11323.2	4577.11	10274.8	8086.2	13524.9	11630.4	10455	22748.5	31116.9	18811.4	29924	23659.1	29893	23488.3	20141	29335.1	22100	24192.7	24457	12937.1	34043.6	+	4.75513	0	12023.3	24930.7	1.05209	Q12860	Contactin-1	CNTN1_HUMAN
32027.8	37790.1	38666.4	30192	27395.3	30571.2	40378.1	59963.8	29092.6	208721	40656.5	11389.6	5936.57	6564.87	13035.1	9506.91	8619.19	16770.5	16235.1	11145.2	21631	6520.76	984.324	+	1.77736	0.00909353	53479.8	12999.7	-2.04052	P49747	Cartilage oligomeric matrix protein	COMP_HUMAN
887328	594877	368434	699384	884305	441279	631411	1141430	435839	2731260	1382640	2369760	2198400	2694590	4074470	2344520	2188350	1563660	3626480	1688760	2034750	1613480	1348700	+	3.36965	0.000125	881555	2240660	1.3458	P02775	Platelet basic protein	CXCL7_HUMAN
14654.9	12945.8	14397.3	10718.2	13701.8	20801.9	14983.3	11521.6	13941.3	47626.6	2427.28	58016	73237	55282.9	82946	41976	57188.4	75312.5	96361	7341.94	7803.06	6112.12	5424.35	+	1.53333	0.0174641	17529.3	43802.2	1.32123	Q01459	Di-N-acetylchitobiase	DIAC_HUMAN
30396.5	74413.2	106933	43190.4	108324	31016.4	95492.8	99479	50973	52367.6	40946.1	262301	390212	265655	300426	216227	71390.5	184238	294274	65142	209419	10287.3	199639	+	2.45677	0.00145098	69258.6	193089	1.4792	P09172	Dopamine beta-hydroxylase	DOPO_HUMAN
426670	282779	310147	278589	244498	268918	408534	305817	373177	743795	494204	93106.3	44622.8	125080	248346	171709	215303	160042	15014.7	229978	161396	116396	91097.4	+	2.72498	0.000494845	364292	166638	-1.12838	P00742	Coagulation factor X	FA10_HUMAN
41904.8	27134.7	47368.7	45479.7	21848.3	31807.2	33229.2	13310.1	33157.4	81230.5	108465	89050.7	235531	193965	274273	117156	135273	160715	182508	107498	97465.1	114897	118382	+	5.10866	0	37647.1	148860	1.98335	P03951	Coagulation factor XI	FA11_HUMAN
15343.2	19331.2	18639.7	18808.8	18921.5	11515.5	17933.4	21924.3	26304.2	36665.1	15590.3	53080.2	20535.2	45402.2	29147.7	47269.5	25669.9	83832.2	61221.9	53622.3	64520.1	61932	42753.1	+	3.15993	0.00025641	20538.7	46505.9	1.17907	P12259	Coagulation factor V	FA5_HUMAN
9177.47	12716.9	14853.1	10623.1	12971.8	9647.14	11922	14328.3	11234	18673	23424.1	48626.4	46031.8	24283.6	63239.7	29875.2	25128.9	42125.1	82850.6	17472.6	18902	58340.7	23531.7	+	3.23766	0.000294118	12614.7	38756.3	1.61932	P08637	Low affinity immunoglobulin gamma Fc region receptor III-A	FCG3A_HUMAN
482852	361453	387216	354046	359540	252489	347040	253337	270172	250490	309654	427962	1276150	1014680	807304	580109	363486	818930	1167940	514014	443560	866715	926602	+	3.08872	0.000246914	331863	732085	1.14142	O75636	Ficolin-3	FCN3_HUMAN
3794690	3128620	4002990	3974210	2750400	3077300	4079220	5276140	3420400	3407710	5417110	2047860	1064120	1353320	1777660	1239640	840027	3235500	1848520	1605790	1905660	955781	460930	+	3.31057	0.000242424	3691170	1827070	-1.01455	P02765	Alpha-2-HS-glycoprotein	FETUA_HUMAN
113398	55669.7	65857.1	30946.4	57909.8	86278.8	87971.4	112184	78819.1	155133	95887.5	1067050	1468290	94067.7	2060480	201452	168617	103587	1208010	365188	1703110	654204	1368500	+	2.44013	0.00142308	84416.7	812188	3.26621	Q03591	Complement factor H-related protein 1	FHR1_HUMAN
18744.1	27910	55859.4	17647.7	49087.3	23054.4	18354.1	17602	18910.5	118804	52459.9	80476.1	116094	90686.4	53987.4	104892	75364.1	33969.7	103734	131774	163181	239500	195582	+	2.74391	0.000505263	36597.3	110900	1.59945	P02671	Fibrinogen alpha chain	FIBA_HUMAN
1098070	625240	465320	1000160	724394	742681	1178670	999046	1898760	2858700	786095	200827	102814	152161	361959	343255	227852	372701	161432	471994	618374	254040	153726	+	3.21533	0.000285714	1159100	323633	-1.84057	P02751	Fibronectin	FINC_HUMAN
35839.5	72602.6	235949	65876.2	75039.4	108683	60328.6	97928.1	22829.7	438106	27339.1	44353.7	8290.01	7644.41	106812	21752.2	24808.9	28728.7	80759.6	32423.3	80375.9	73780.5	24212.9	+	1.37695	0.0285153	121318	43175.4	-1.49051	Q9Y2I7	1-phosphatidylinositol 3-phosphate 5-kinase	FYV1_HUMAN
302647	282378	488220	352688	251369	366752	336177	313940	365232	478434	362709	122828	50749.8	136138	114383	95142.7	96554.5	177689	73641.3	261015	238684	90665.1	46026	+	4.99756	0	353784	143556	-1.30126	P06396	Gelsolin	GELS_HUMAN
16799.3	16579.6	11950.5	11697.1	11272.6	18117	12358.7	14073.9	8922.54	32976.6	29248.8	68107.8	108331	64171.8	308022	67794.5	44448.1	88765.3	55546	40274.2	80272.9	64190.1	75132.1	+	2.22428	0.00278992	15474.8	84177.3	2.44351	Q92820	Gamma-glutamyl hydrolase	GGH_HUMAN
10327700	7075100	9560430	8313150	8584090	12653200	13090300	10757000	9006630	517884	16951000	17443500	38004000	22724200	28920300	15894700	18930300	18080900	23838700	25132100	9777520	29118100	30432500	+	4.50684	0	8988550	22711400	1.33726	P02790	Hemopexin	HEMO_HUMAN
294311	108641	305713	323493	222254	205350	422385	308101	578044	1069880	326929	110285	49442.4	112618	142100	115478	82467.1	186290	41586.1	181180	216360	40452.5	45576	+	2.39374	0.00162963	383818	126982	-1.5958	P05546	Heparin cofactor 2	HEP2_HUMAN
345914	169131	122849	155752	297389	373207	361645	211059	192456	110623	300782	79890.6	85628.9	46899.7	107228	68827.9	53455.2	142387	89971.8	37533.7	40500.8	54038.7	93031.8	+	3.17166	0.000263158	234003	92321.3	-1.34179	P04196	Histidine-rich glycoprotein	HRG_HUMAN
11621.3	37035.3	47798.4	9555.43	7130.27	8588.25	23562.4	20766.3	29424.3	108785	10561	9713.56	0	15995.3	4482.18	10568.4	29929.9	12833.2	16167.8	12249.3	0	13602.9	18661.7	+	1.32299	0.0331294	30426.7	11905	-1.35377	P23083	Ig heavy chain V-I region V35	HV103_HUMAN
116547	95500.4	144720	133738	121724	89705.6	48377.9	184222	115241	89484.7	154299	391755	489476	436163	612298	248074	352940	231266	568426	286162	530778	594070	393191	+	5.29822	0	113926	406838	1.83636	P17936	Insulin-like growth factor-binding protein 3	IBP3_HUMAN
15409100	22768700	9690190	10362100	2100260	5906910	15924300	3359360	14085200	43509500	7351890	8994730	1430560	2619300	2851300	10260500	14629500	3608930	7092030	9777160	3068470	8041650	8858520	+	1.33694	0.0319048	14311600	6814190	-1.07057	P01876	Ig alpha-1 chain C region	IGHA1_HUMAN
281511	250276	146201	234333	198610	164044	236297	293245	329802	704276	391094	1003930	1002010	825798	1856760	361664	467386	861014	606510	798492	1090750	688716	1177620	+	3.46611	7.27273e-05	283859	856288	1.59292	P03952	Plasma kallikrein	KLKB1_HUMAN
21246	37465.7	33115.2	15353.6	15364	20502.1	30668.6	18264.2	59316.6	90791.6	9854.57	13978.6	13779.8	2645.3	1195.59	14981.7	12976.2	9024.36	6131.27	6606.04	15056.1	10614.9	49016	+	1.99258	0.00538583	34208.8	12758.5	-1.42291	P01604	Ig kappa chain V-I region Kue	KV112_HUMAN
675167	1418910	977946	625186	769439	325966	1191580	1333810	1779070	2656610	405995	373194	256694	176660	180670	779410	668300	346826	452545	758557	309593	1804570	922789	+	1.76384	0.0093617	1175370	571985	-1.03907	P01605	Ig kappa chain V-I region Lay	KV113_HUMAN
56004.6	48785.8	111196	54315.7	50834.4	44074.5	69284.6	75471	103419	305121	44780.6	22309.8	0	5198.13	0	33870.3	52860.6	33803.3	54089.7	62169.1	17207.5	38577.1	78384.1	+	1.69819	0.0107671	91850.6	34096.2	-1.42968	P04430	Ig kappa chain V-I region BAN	KV122_HUMAN
16207.6	33331.3	34130.9	16657.1	15348.3	33664.6	53786.4	69466	30103.1	184572	9141.51	14972	0	9045.38	0	19935.4	17179.7	8720.88	18528.2	26902.3	6304.83	22428	15969.2	+	1.69563	0.0107755	48726.7	13009.8	-1.90511	P01624	Ig kappa chain V-III region POM	KV306_HUMAN
245032	181440	170822	92335.2	135757	121038	340637	280633	442156	82028.3	54116.3	35320	44563.6	22150.9	17669.7	91259.1	158142	71924.1	82169.2	18104.4	44165.2	243824	176049	+	2.42973	0.00144762	209188	81496.8	-1.35998	P01625	Ig kappa chain V-IV region Len	KV402_HUMAN
73238.7	91609.1	105279	110732	104081	160555	101481	234800	68047.5	96856	112454	30362.3	19735.9	26408.3	40085.7	38140.2	19390.4	45963.5	34851.1	60031.6	26329.7	46268.3	22173.1	+	3.97846	0	114668	40168.8	-1.51332	Q08380	Galectin-3-binding protein	LG3BP_HUMAN
25565.3	40940.2	45307.4	48405.3	36986.4	35533	43565.3	36841.8	25603.8	26042.4	77637.1	471079	575046	272724	326842	280081	296505	187142	506199	178254	405677	355345	265260	+	5.64589	0	36479.1	322907	3.14598	P61626	Lysozyme C	LYSC_HUMAN
13404.2	30473.5	30178	20756.8	21869.3	29333.8	31677.6	27991.7	20979.4	84405	48133.6	2042.7	0	3179.34	3286.45	2694.71	0	2736.32	0	0	8736.12	3027.25	0	+	2.91809	0.000409091	31106.9	5679.73	-2.45334	P33908	Mannosyl-oligosaccharide 1,2-alpha-mannosidase IA	MA1A1_HUMAN
73904.4	61283.8	85114.7	55123.8	45442.8	84334.5	101079	48623.4	58352.7	45559.8	88601.6	0	9154.71	6500.97	30036.9	20491.7	13687.2	10242.2	10538.4	16240.8	22250.5	11121	20896.3	+	4.45037	0	65881.9	19981.7	-1.7212	O00187	Mannan-binding lectin serine protease 2	MASP2_HUMAN
40828.6	56210.9	61896.1	4950.62	11697.3	31965.5	657024	36505.7	6803.44	80462.7	1454970	867667	13307.8	942153	10779.7	9192.27	31644.7	768613	934515	9115.08	2186220	95499.6	3275470	+	1.41833	0.0253082	98834.5	815319	3.04428	P04220	Ig mu heavy chain disease protein	MUCB_HUMAN
35476.3	22613.6	38193.7	45760.9	27616.3	36490.6	34003.2	23816.2	20800.1	101356	34348.6	15701.2	21097.6	10179.6	13208.1	12259.1	12998.2	27258	30221.6	21146.7	19424.2	12678	7215.28	+	2.08685	0.00426016	38612.7	18287.4	-1.07823	P80108	Phosphatidylinositol-glycan-specific phospholipase D	PHLD_HUMAN
1077220	1037060	1315830	1158060	1064500	952063	1180900	1653700	1102860	2934660	1481740	159433	419283	388508	761430	638881	457840	385570	259089	608713	990173	508708	656711	+	3.02691	0.000282353	1347690	593544	-1.18306	P00747	Plasminogen	PLMN_HUMAN
64773.8	113210	152607	81825.2	101224	119325	144782	109043	95230.2	277858	163995	28648.5	19019.7	21453.7	32951.5	31493.1	25749.5	39001.2	19839.7	57298.3	47434.6	23349.1	15419.3	+	3.35642	0.000184615	125988	40434.8	-1.63962	P27169	Serum paraoxonase/arylesterase 1	PON1_HUMAN
23692.7	39841.8	41183.2	25992.5	24995	51555.8	71180.4	44698.1	51438	170628	56519.9	0	0	0	0	6525.85	0	4159.25	0	0	13429.9	0	10752.6	+	2.85204	0.000395604	54520.6	7029.81	-2.95524	Q15166	Serum paraoxonase/lactonase 3	PON3_HUMAN
69759.3	51604	103779	80981	108606	350888	64230	71793.6	144347	213484	327234	339978	694095	446664	1190090	216379	181747	148417	421989	209731	285804	126129	173203	+	1.67404	0.0114324	125947	366266	1.54008	P27918	Properdin	PROP_HUMAN
92306.7	91495.2	90042.5	111222	97823	76940.7	109431	119157	124503	64713.4	169099	66402.6	27606	43055.4	46565.1	9335.02	6346.46	13544.7	25266.5	14843.1	40631	29058.7	24391.6	+	3.21307	0.000277778	97763.5	39703.5	-1.30003	P07225	Vitamin K-dependent protein S	PROS_HUMAN
218196	144818	159972	208556	225249	88689.5	388512	235943	164852	1629110	122324	55157.9	102982	44471.1	63831	46498.6	34494.3	65662.7	86903	99791.5	109090	165929	51065.6	+	1.31857	0.0334971	346390	80630.8	-2.10299	P35542	Serum amyloid A-4 protein	SAA4_HUMAN
2018230	1012800	1690570	1894590	1099000	1943820	1321570	1160060	1098670	1503340	223042	950738	813861	629538	341275	413682	491462	513311	576648	1071350	467382	488405	534838	+	6.02994	0	1474270	578118	-1.35056	P02743	Serum amyloid P-component	SAMP_HUMAN
25980.9	41599.7	48050.2	31921.8	32603.3	26020.2	40776.9	39355.9	33352	24611.5	162911	66040.7	242422	121917	146104	64961.1	48307.4	32811.4	49733.2	76900.2	104278	77927.6	161107	+	2.80048	0.000468085	34427.2	104263	1.59861	P05543	Thyroxine-binding globulin	THBG_HUMAN
6016230	3980150	5868690	5701670	3767380	6239520	3387270	2143210	5700550	2817400	5269640	225423	435481	1081950	1306940	1544490	1415650	2829360	665873	1485440	2132520	1185200	1219970	+	4.29059	0	4562210	1599840	-1.51181	P04004	Vitronectin	VTNC_HUMAN
0	4464.66	0	2021.1	8692.57	0	1013.07	0	0	0	2932.65	14569.6	10518.2	15278.4	9682.07	10785.5	10277.3	20798.4	17662.5	3857.36	10197.8	13803.5	5273.47	+	4.41328	0	1619.14	11202.8	2.79056	P12821	Angiotensin-converting enzyme	ACE_HUMAN
4785.86	29027.5	18019.1	12664.1	26471.5	8099.23	18701	15005	6482.6	0	40565.2	15165	36994.1	29858.9	24173.7	37881.7	35897.9	28968.1	32432.1	22492.9	44104.8	27056.3	74291.1	+	3.1296	0.000253165	13925.6	34606.3	1.3133	Q15848	Adiponectin	ADIPO_HUMAN
1824.15	1777.25	0	0	1670.2	0	0	0	0	0	8639.69	4679.37	9105.56	7982	13259.7	7908.64	10300.2	7402.03	18985.5	8380.1	6725.75	5760.32	5486.21	+	5.97623	0	527.159	8816.54	4.0639	P04745;P19961;P04746	Alpha-amylase 1;Alpha-amylase 2B;Pancreatic alpha-amylase	AMY1_HUMAN;AMY2B_HUMAN;AMYP_HUMAN
3824.25	4753.27	3418.25	3021.98	4792.32	4133.09	0	5078.61	3141.59	0	5317.04	6874.04	13914.4	8192.5	13655.6	7462.81	7151.04	14493.3	13942.7	3887.63	6557.25	4902.75	6281.45	+	3.28592	0.000298507	3216.34	8664.04	1.42962	P54802	Alpha-N-acetylglucosaminidase	ANAG_HUMAN
84136.1	43512.2	65425.7	298620	112916	24595.6	36345.1	62845.5	107988	0	16572.4	11434.3	68905.6	11563.8	9361.41	13744.4	14715.4	9092.64	13136.4	9507.88	7181.44	16446.1	15483	+	2.01083	0.00512903	83638.4	16703.4	-2.32402	P02656	Apolipoprotein C-III	APOC3_HUMAN
0	0	0	0	7215.76	0	0	0	0	0	10382.8	5574.62	4402.37	3710.68	3578.22	5273.69	2507.87	6177.66	12657.6	7232.92	7507.99	4604.35	7224.73	+	4.21928	0	721.576	6218.12	3.10726	Q6UY14	ADAMTS-like protein 4	ATL4_HUMAN
2441.15	6213.24	0	1573.16	329.82	0	8778.23	1929.5	3130.35	0	10130.5	6637.68	20679.2	8677.04	17525.2	7923.43	8458.4	10639.9	10774.3	14045.4	17657	7172.04	13168	+	4.9339	0	2439.54	11806.8	2.27494	P54289	Voltage-dependent calcium channel subunit alpha-2/delta-1	CA2D1_HUMAN
2526.33	3950.17	1020.87	1599.75	3176.57	3628.35	1409.25	2181.11	1170.55	0	7464.92	7796.38	13022.3	7275.49	13227.8	3297.85	5376.58	2883.8	8319.12	5658.99	4747.8	3827.3	8038.35	+	3.69196	0	2066.29	6995.14	1.75931	Q9BY67	Cell adhesion molecule 1	CADM1_HUMAN
5794.6	3313.39	0	17535.2	3433.17	6364.42	6344.01	0	1692.57	3122.45	15984.4	17243.1	39827.2	48340.4	59003.2	26300.3	23605	14483.4	11463.7	18600.2	20162.2	8361.45	14031.7	+	3.06204	0.000292683	4759.98	24415.9	2.35879	P00918	Carbonic anhydrase 2	CAH2_HUMAN
10638.2	12199.4	6785.3	21764.8	7439.5	10080.8	5000.21	3435.88	2396.07	0	14739	29041	8464.28	15954.4	17798.9	22228.1	20292.3	20164.9	38998.9	24609.5	18761.4	18843.6	10597.6	+	3.17203	0.000266667	7974.01	20038	1.32936	P04040	Catalase	CATA_HUMAN
2100.04	3155.19	4927.64	4190.98	2580.56	0	0	1683.22	6962.62	0	6039.77	15780.5	10443.7	14434.2	15326.5	9224.11	6696.48	12267.1	23374.9	8758.68	15462.6	6644.29	5857.66	+	4.32643	0	2560.02	11562.4	2.17521	P07339	Cathepsin D	CATD_HUMAN
0	3157.5	8109.56	0	8052.81	0	0	3049.6	764.513	0	8080.41	21745.2	17639.3	13781.6	25084.2	7488.16	8888.25	7045.67	14767.9	8762.67	12112.3	9080.84	8423.13	+	4.18038	0	2313.4	12530.7	2.43738	P07711	Cathepsin L1	CATL1_HUMAN
12037	5993.29	14450.7	9737.53	10817.7	24183.6	0	0	0	0	19971.8	22540.3	34648.2	33021.2	34034	20472.3	12006.7	26379.9	45820.7	16172	22279.9	21044.9	8141.53	+	3.38952	0.000129032	7721.97	24348.7	1.6568	Q9UBR2	Cathepsin Z	CATZ_HUMAN
2249.33	4690.64	0	2505.55	3548.76	2723.4	1430.9	3333.18	0	0	7781.91	8887.25	16810	15127.7	16757	8554.76	9385	29818.3	19947.6	9499.16	7045.74	15490.1	17005.8	+	4.93145	0	2048.18	14008.5	2.77389	Q9Y646	Carboxypeptidase Q	CBPQ_HUMAN
20630.8	32041.9	26713.8	25215.5	20697.5	32393	21162.1	35508.4	21199.8	0	81195.5	110029	167107	92694.8	168906	66082.9	73253.9	60368.9	125741	73040.2	61071.4	58196.9	94712.8	+	4.95122	0	23556.3	94800	2.00877	P16070	CD44 antigen	CD44_HUMAN
3359.89	11201.2	4304.29	6019.12	4202.34	4993.22	7376.3	3871.2	2308.86	0	9410.15	14693.5	17131	15273	14572.1	16370.1	18493.2	20199.2	26517.3	20972.1	10336.7	16314.9	12840.9	+	6.15852	0	4763.65	16394.2	1.78305	Q9NZK5	Adenosine deaminase CECR1	CECR1_HUMAN
1451.25	3159.09	5027.31	0	1850.38	0	3815.78	0	861.403	0	4942.68	13601.4	3340.11	11583.9	32594.4	4480.41	5276.33	4986.58	5726.39	7968.06	5015.16	5546.23	2812.93	+	1.7753	0.00914286	1616.52	8298.04	2.35988	Q8IWV2	Contactin-4	CNTN4_HUMAN
6425.76	7028.83	8775.47	5339.85	5725.21	4537.68	0	5154.95	0	0	5479.37	5340.93	11030.7	13935.8	11060.2	13154.4	11553.4	8916.76	12164	7703.31	8542.98	6464.92	9140.26	+	3.39128	0.000133333	4298.77	9575.93	1.15549	P02452	Collagen alpha-1(I) chain	CO1A1_HUMAN
0	0	0	0	0	0	0	6509.23	4517.31	0	4966.38	11883.7	12544.7	6099.4	11816.6	6347.72	5953.41	5355.17	15592.7	13779	9812.19	10292.9	6502.78	+	5.42815	0	1102.65	9303.59	3.07681	P20023	Complement receptor type 2	CR2_HUMAN
28523.3	4143.67	6794.37	5743.69	9968.31	0	0	10991.3	0	0	9358.86	17738.9	26959.4	24273	9883.16	18453.4	15005.6	10097.5	20837.7	10206.6	17391.2	10923.8	24211.2	+	2.35494	0.00194595	6616.46	16564.6	1.32397	Q14574	Desmocollin-3	DSC3_HUMAN
7562.75	15270.8	11539.4	10926	13119.5	19869.8	11087.7	5251.46	7913.41	0	15959.7	22895.4	31620.3	21529.4	64907.6	15968.8	16235.7	16431.2	5640.2	16006.2	17496.6	17804.2	16525.3	+	1.53903	0.0172105	10254.1	21463.1	1.06566	Q13822	Ectonucleotide pyrophosphatase/phosphodiesterase family member 2	ENPP2_HUMAN
5419.9	4927.41	2320.42	0	1707	12413.9	14428.5	5543.14	0	0	30084.1	22712.7	14136.7	42367.4	29200.9	42017.1	28691.4	33534.1	93334	35523.7	22154.4	19958.9	26131.7	+	3.755	0	4676.03	33834.4	2.85513	P00488	Coagulation factor XIII A chain	F13A_HUMAN
17990.9	12480.1	9703.68	13021.3	16861.3	9188.25	12212.1	10463.9	27504.5	0	13890.5	922.163	23127.9	3069.99	4458.71	6540.81	3315.65	3246.38	4723.31	5570.44	5641.3	900.264	2471.59	+	1.7059	0.0107222	12942.6	5990.69	-1.11133	P00740	Coagulation factor IX	FA9_HUMAN
0	5894.97	0	0	0	4688.07	0	0	0	0	3431.67	11664.7	8461.85	7057.57	10062.2	3184.35	7708.74	6463.26	12558.6	4140.82	5354.04	8595.34	6435.2	+	4.79399	0	1058.3	7316.8	2.78946	Q12841	Follistatin-related protein 1	FSTL1_HUMAN
2948.22	5036.56	5308.97	2962.15	3512.11	0	3864.55	1858.06	1349.25	0	3172.47	44013.7	63504.2	59093.9	46495.2	5893.87	11256.4	22836.2	18873.4	7684.34	16925.1	19895.2	13784.3	+	2.68022	0.00064	2683.99	25648.3	3.25641	P04066	Tissue alpha-L-fucosidase	FUCO_HUMAN
0	0	14181	0	9125.27	0	1745.69	0	0	0	13275.8	35806.4	18081.8	26012.5	25003.8	38886.6	27245.5	37659.5	28803.2	20068.1	32969.7	34468.2	34277.6	+	7.97146	0	2505.2	28658.4	3.51596	Q9BTY2	Plasma alpha-L-fucosidase	FUCO2_HUMAN
0	9895.94	6584.47	5291.81	2606.7	0	0	0	3581.75	0	6027.19	5942.7	20464.5	9613.34	8161.25	16912.9	13340.5	15847.6	13230.4	8382.97	16994.2	10863	25294.3	+	4.19202	0	2796.07	13159.6	2.23464	P00390	Glutathione reductase, mitochondrial	GSHR_HUMAN
9944.66	23021.4	14704.7	10868.1	18174.5	14228.5	13177	9211.05	10438.4	0	26697	35275	27779.1	27662.3	33483.5	24207.4	19770.6	15575.4	26877.4	24473.2	27676.7	42057.1	28881.8	+	4.91937	0	12376.8	27724.3	1.16351	Q16270	Insulin-like growth factor-binding protein 7	IBP7_HUMAN
8996.2	9723.93	7806.5	7913.14	7156.91	0	8421.03	6741.78	7611.39	0	19764.4	31587.5	24794.1	21421.2	22243.9	23901	18868.5	29716.7	35529.1	18953.1	13771.8	17114.8	20086.8	+	6.68332	0	6437.09	22904.1	1.83113	P05362	Intercellular adhesion molecule 1	ICAM1_HUMAN
12128.8	16892.9	16591.2	18123.3	22185.6	24304.1	17906.4	19192.8	14930.2	0	25353.1	48597.6	108070	29833.4	101576	38327.2	47195.6	32697.4	85689.3	46232.9	27055.6	56456.9	58128.9	+	3.4289	0.000137931	16225.5	54247.2	1.74129	P13598	Intercellular adhesion molecule 2	ICAM2_HUMAN
10315.4	19941	13381.9	19704.2	9786.35	9464.62	0	10186.6	14532.4	0	21678.8	31445.2	33719.2	9864.34	30693	8613.48	57762	5361.69	22611.3	10047.1	17674.2	27070.8	21633.2	+	1.70264	0.0107034	10731.2	22936.5	1.09583	P32942	Intercellular adhesion molecule 3	ICAM3_HUMAN
2139.83	2830.34	0	0	2227.68	0	0	0	0	0	1579.76	7684.02	10382.8	6371.67	4331.66	5046.14	4658.34	1929.31	10350.6	3598.24	6251.09	6703.91	4647.01	+	4.562	0	719.785	5656.51	2.97427	Q9NQ38	Serine protease inhibitor Kazal-type 5	ISK5_HUMAN
3151.64	6283.37	6107.49	3563.15	4326.97	11430.3	5017.69	3005.57	8983.76	0	6982.78	14519.8	23378.1	12265.1	21188.9	8065.74	12321	12702.1	22040.9	6110.41	8413.33	15161.8	8063.8	+	3.02435	0.00027907	5186.99	13170.3	1.34432	Q07954	Prolow-density lipoprotein receptor-related protein 1	LRP1_HUMAN
49320.3	97812.1	103221	62205.3	72358.6	50493.6	55125.1	91922.1	62592.1	0	79175.6	191274	70492.6	266277	89078.3	202814	248867	96208.2	196158	141057	175378	275384	214501	+	3.67167	0	64505	172820	1.42179	P14151	L-selectin	LYAM1_HUMAN
6914.07	0	0	0	0	0	2437.91	0	0	0	281.965	7017.29	7421.12	7644.07	6299.22	8801.22	4716.41	6305.59	3769.62	10769.5	11116.1	5623.69	8082.97	+	4.51346	0	935.198	6757.59	2.85317	P40925	Malate dehydrogenase, cytoplasmic	MDHC_HUMAN
3924.91	2341.61	0	1612.46	0	0	1849.77	539.436	1176.67	0	3384.41	11055.2	6091.15	7168	9205.19	4255.55	4153.71	4931.17	11882.2	4286.98	2663.35	2517.25	2470.48	+	3.39944	0.000135593	1144.49	5697.28	2.31557	Q12866	Tyrosine-protein kinase Mer	MERTK_HUMAN
2017.82	2802.41	2686.53	3378.14	0	0	1853.28	1765.06	630.546	0	3036.01	8164.37	7548.37	6145.52	11770.3	3184.68	5441.85	5571.2	8350	5030.25	3765.72	5585.07	5764.03	+	4.69608	0	1513.38	6104.42	2.01208	P11717	Cation-independent mannose-6-phosphate receptor	MPRI_HUMAN
9210.38	12272.4	9142.52	4881.43	7920.02	0	10168.8	8801.17	13277.8	0	13476.3	11696.1	29029.7	17929.2	45996.3	13976.2	7847.88	20921.4	30200.3	15542.3	11189	9298.12	4706.78	+	1.85642	0.00728358	7567.45	17831.5	1.23655	Q15113	Procollagen C-endopeptidase enhancer 1	PCOC1_HUMAN
0	242.21	0	0	1914.45	0	2366.16	2287.51	0	0	258.031	7307.32	3254.67	471.392	4707.2	7934.66	9120.51	6744.49	10915.1	3863.21	3753.95	4845.82	3365.69	+	3.43091	0.000140351	681.034	5118.61	2.90995	P04085	Platelet-derived growth factor subunit A	PDGFA_HUMAN
0	0	751.226	0	0	0	0	0	0	0	2728.12	17128	12232.3	23219	4018.39	10567.8	18476.8	8442.48	31809.5	8779.69	11005	14152.6	3531.07	+	4.01576	0	75.1226	12776.2	7.41	P05164	Myeloperoxidase	PERM_HUMAN
178824	52008.8	68049.5	218084	164538	113604	104457	185082	76117.1	0	172802	647429	126622	251438	188238	329511	307432	312273	682582	340810	379713	305137	239060	+	2.98797	0.000275862	116076	329465	1.50506	P10720;P02776	Platelet factor 4 variant;Platelet factor 4	PF4V_HUMAN;PLF4_HUMAN
0	0	4650.17	0	3987.55	0	0	0	0	0	13270.7	10649	23960.5	18602.4	32992.3	13313.5	22432.3	9180.12	9780.31	18908.7	8640.92	24238.2	7696.12	+	5.39589	0	863.772	16435.8	4.25005	P23284	Peptidyl-prolyl cis-trans isomerase B	PPIB_HUMAN
7684.1	4282.78	9205.82	5753.32	5423.18	0	5061.08	4098.57	15648.9	23132.5	3696.99	48703.9	24926.7	29014.3	28792.5	19602.7	17968.5	23144.6	83748.9	43316	22566.7	30488.9	7142.19	+	2.34112	0.00191453	8029.02	29470.2	1.87596	Q92954	Proteoglycan 4	PRG4_HUMAN
23809	11876.9	0	0	2376.32	0	4115.5	0	969.221	0	11835.7	14103.5	22858.3	32085.5	38568.8	20493.4	37360	6331.55	13019.1	16194.9	20701.4	15418.9	10224.1	+	3.18314	0.00027027	4314.69	19938.1	2.2082	P07737	Profilin-1	PROF1_HUMAN
10873.6	13175.7	19092.1	19984.9	16396	17186.8	5510.21	20311.8	5512.01	0	34003.6	48573.7	105563	36551.6	70939.7	12786	23636	21190.1	55194.3	24363	30702.8	38181	15199.6	+	2.37581	0.00170909	12804.3	39760.3	1.6347	P41222	Prostaglandin-H2 D-isomerase	PTGDS_HUMAN
2930.17	6583.72	3765.97	3367.33	3989.52	3670.18	2382.19	3515.64	1204	0	6875.11	11668.8	9923.19	10424.8	11281.4	7555.91	9260.13	5103.21	16107.1	5603.93	8314.64	7109.16	7141.19	+	4.69398	0	3140.87	8951.42	1.51095	P23470	Receptor-type tyrosine-protein phosphatase gamma	PTPRG_HUMAN
7296.92	2882.91	5328.81	6361.15	1840.52	0	1866.87	2367.6	0	0	6752.55	15007.4	18312.9	12056.7	21058.4	8059.56	12253.8	8621.22	25403.5	13388.8	8896.62	18779.8	10247.3	+	4.85856	0	2794.48	13756.8	2.29949	P28827	Receptor-type tyrosine-protein phosphatase mu	PTPRM_HUMAN
0	1168.7	0	0	0	0	10420.6	0	0	0	8056.86	16224.1	13562.7	7148.77	18594	7763.33	8225.51	8671.38	9056.52	17788.2	8166.54	19179.7	9180.66	+	5.27967	0	1158.93	11662.9	3.33106	Q13228	Selenium-binding protein 1	SBP1_HUMAN
0	0	0	1145.33	1157.69	0	20042.9	0	0	29992.4	26373.8	16005.8	16648.8	77519.6	21765.9	37902.7	26510.6	5247.56	27300.2	25984.2	44573	39673.3	13079	+	2.84309	0.000434783	5233.84	29121.9	2.47616	P37802	Transgelin-2	TAGL2_HUMAN
11294.4	18087.1	12171.4	7028.54	4684.02	8373.28	6883.18	13596.1	8571.51	0	16190.3	22780.9	34755.1	27514.8	35339.5	24000.6	21835.3	16087.2	59707.9	11532.3	17253.3	14064.9	17655.1	+	2.74046	0.0005	9068.95	24516.7	1.43476	Q7Z7G0	Target of Nesh-SH3	TARSH_HUMAN
56259.9	44161.7	112105	70587.8	66881.6	23232.6	28927.1	72490.5	34628.8	0	16772.6	19551.5	4254.83	7056.28	6262.48	8740.43	3545.68	2377.54	23399.2	15752	6464.08	14315.4	10704.6	+	3.68605	0	50927.5	10707.4	-2.24984	Q9NNX1	Tuftelin	TUFT1_HUMAN
0	0	6113.09	0	0	0	0	0	6514.77	0	30627.9	7326.98	18374.1	8819.77	8410.34	8390.8	7969.33	6391.29	10692.9	16755.9	35118.6	44967.6	31355.9	+	3.19355	0.000273973	1262.79	18092.4	3.8407	P11684	Uteroglobin	UTER_HUMAN
4900.37	5364.03	7606.18	9489.04	2704.81	0	1563.21	7056.91	8673.97	0	3665.35	25321	1953.62	9635.87	10451.4	9957.66	9860.38	20265.5	9412.66	14508.2	7959.93	15780.2	16458.6	+	2.35074	0.0019469	4735.85	11940.8	1.3342	Q9UK55	Protein Z-dependent protease inhibitor	ZPI_HUMAN
0	0	0	0	0	0	0	0	0	14968.4	56445	4548.43	19875.7	34108.1	22843.9	33642.8	24384.4	8470.25	11311.4	69281.7	30351.1	113745	51190.6	+	2.86529	0.0004	1496.84	36938.3	4.62513	Q15942	Zyxin	ZYX_HUMAN

## Sheet: MTC_TN_change
1	2	3	4	5	6	7	8	9	10	11	12	13	14	52	53	54	55	56	57	58	59	60	61	C: Student's T-test Significant TN_MC	N: -Log Student's T-test p-value TN_MC	FDR value	N: Mean TN	N: Mean MC	ratio_MC/TN	T: SAMPLENAME	T: PG.ProteinDescriptions	T: PG.ProteinGroups
2286080	1015740	1457140	1147820	1772380	549544	2165750	1948210	5589890	1100750	2045130	1875300	2024040	1336040	3357480	1627470	5460830	3951330	679993	2482000	11326100	2688240	4723690	2491680	+	1.49584	0.0314286	1879560	3878880	1.04525	P01009	Alpha-1-antitrypsin	A1AT_HUMAN
1470930	1993940	1906280	1850100	1706290	2228280	2300930	1833210	5757090	1031000	1066570	1100070	2116880	1377810	2825720	2690300	6019210	4287510	5136340	2701730	10666200	2820230	6420800	4751310	+	2.97953	0.000695652	1981380	4831940	1.2861	P02750	Leucine-rich alpha-2-glycoprotein	A2GL_HUMAN
2433.97	3181.64	3976.82	2818.78	4526.35	2829.72	3218.18	4117.95	3092.95	2587.25	3305.58	3090.12	2654.4	1768.65	0	902.304	0	252.216	0	0	0	0	424.935	0	+	10.5379	0	3114.45	157.946	-4.30147	P05067	Amyloid beta A4 protein	A4_HUMAN
16012300	8056070	12702600	8253030	7549130	8879790	11809300	11135200	21583600	7407850	6649490	8111030	14341300	8547590	23877900	27060400	33442600	23851000	4673790	21541000	56000100	33061100	35545300	32672000	+	4.24782	0	10788500	29172500	1.43511	P01011	Alpha-1-antichymotrypsin	AACT_HUMAN
15733.1	14756.3	15920.4	29192.1	15565.3	12945.9	12792.4	8527.75	9449.7	20636.7	12321.8	13219.4	15157.2	11871.6	36921.8	27957.1	37734.7	61853.3	16205.4	24372	42386.8	44779.5	30548.3	30117.7	+	4.78731	0	14863.5	35287.7	1.24739	P15144	Aminopeptidase N	AMPN_HUMAN
5716.64	12387.2	5167.39	10194.9	6156.05	7763.92	8404.87	4079.36	5033.24	14049.1	4702.68	8686.6	7658.8	6969.25	17066.4	11938.4	14943.6	20023.6	20218.4	16358.4	24190.4	11928.8	14010.4	7255.13	+	4.3753	0	7640.72	15793.4	1.04754	Q16853	Membrane primary amine oxidase	AOC3_HUMAN
7164890	6274840	11942300	10823900	7704340	6643920	14112600	16744700	6543210	9714770	16768800	8437010	8414500	14901100	3049250	4701960	3416490	2805090	1923810	3411880	2869720	2022800	4871420	4786300	+	4.95733	0	10442200	3385870	-1.62483	P02647	Apolipoprotein A-I	APOA1_HUMAN
936645	1059140	1324900	637232	554630	442845	1072480	1551190	809314	768870	1923020	816788	847701	1069810	317207	341691	301497	380501	259360	323867	209483	291458	373856	405299	+	4.50418	0	986753	320422	-1.62272	P02652	Apolipoprotein A-II	APOA2_HUMAN
6202700	3944540	4592610	3551300	4361750	4490260	5895390	7512830	1329520	4089530	3969040	3103360	3942360	4718810	580890	378383	381744	238036	294061	284070	215688	265951	372803	923850	+	7.7186	0	4407430	393548	-3.48533	P06727	Apolipoprotein A-IV	APOA4_HUMAN
28102.9	58993.8	25795.2	21694.7	32769.9	5762.64	35727.8	135343	23867.3	77882.6	267239	40544.2	15518.2	25924.3	3881.21	7953.83	0	0	0	25393.4	10170.6	0	0	25874.1	+	1.45087	0.0359236	56797.5	7327.32	-2.95447	P02656	Apolipoprotein C-III	APOC3_HUMAN
210797	122089	178149	212330	149620	105095	117275	194829	164092	270002	218070	230700	78852.1	144916	413600	437514	357508	386448	849179	277598	327422	328506	301569	238370	+	3.77874	0.000117647	171201	391771	1.19432	P02745	Complement C1q subcomponent subunit A	C1QA_HUMAN
731429	645237	686187	984411	629657	970604	767200	802341	793501	979964	804072	957232	964471	734983	2479370	2011980	2817220	2132580	4164240	1267780	1720060	2296840	2212890	1502600	+	5.90882	0	817949	2260560	1.4666	P02747	Complement C1q subcomponent subunit C	C1QC_HUMAN
148302	97425.9	99933.7	65555.9	89409.2	76614	103113	89424.6	132144	97018.2	123554	100183	111740	118780	49268.1	31371.5	38930.1	16514.3	183708	22027.2	35480.7	48856.2	56584.2	35974.7	+	2.78702	0.00118367	103800	51871.5	-1.00079	P20851	C4b-binding protein beta chain	C4BPB_HUMAN
27449.8	26873.5	29644.4	35120.8	13942.9	63548.3	22832.8	25814.6	9976.66	33961.8	12807	25482.4	24589.5	21437.3	22029.5	9611.47	8329.89	8521.3	12845.3	8178.06	5428.2	0	21155	5768.5	+	2.8652	0.001	26677.3	10186.7	-1.38893	P33151	Cadherin-5	CADH5_HUMAN
242226	126864	177551	136616	84660.1	60598.8	89475.6	121928	43194.6	181313	158324	104138	149470	33123.9	166505	128102	187413	1087310	36281.7	226902	989352	488163	263778	611937	+	2.16392	0.00535338	122106	418574	1.77735	P00915	Carbonic anhydrase 1	CAH1_HUMAN
34172.8	12405.3	8917.02	7946.92	7934.1	4998.26	8818.06	7411.29	4162.86	16707.7	14294	11941.7	12631	3846.64	24081.4	8502.94	38769.1	94615.5	0	16368	99464.8	39748	24546.6	49868.4	+	2.25069	0.00463492	11156.3	39596.5	1.82751	P00918	Carbonic anhydrase 2	CAH2_HUMAN
25012.1	9217.49	12392.4	15519.2	11094.8	6782.81	13211.2	11876.3	8558.12	20809.3	19195.6	13297.5	15053.9	2855.11	20299.7	15286.9	35459.3	76951.4	33668.5	17267.5	55227.7	34736.3	18451.3	29850.4	+	2.97201	0.000731183	13205.4	33719.9	1.35247	P04040	Catalase	CATA_HUMAN
276492	321102	213288	290972	167981	136777	164252	185738	129033	190731	262432	239288	252060	180160	599419	714963	757904	554218	497213	636527	508437	969355	577051	472766	+	8.39272	0	215022	628785	1.54808	P15169	Carboxypeptidase N catalytic chain	CBPN_HUMAN
9553.77	6880.65	3394.27	6158.99	9935.29	11531.4	8902.18	8484.99	11206.8	10339.1	4821.06	4113.54	10431.7	10758.3	29472.8	16012.5	36944.6	30074.6	26399	13472.5	20714.9	21745.5	24459.4	14264.5	+	6.14381	0	8322.29	23356	1.48874	Q13740	CD166 antigen	CD166_HUMAN
37932.3	26258.6	31885.2	16261.2	26791.1	23610.4	39066.6	25729.6	28210.4	19520.1	16479.2	23347.7	30646.4	27100.8	73822.1	38295.3	95517.2	69123.1	105480	44033.5	52208.7	68015.2	56567.4	55595.6	+	5.7596	0	26631.4	65865.8	1.3064	P16070	CD44 antigen	CD44_HUMAN
8285.27	7814.18	6465.63	4544.75	5986.12	6134.75	6161.38	5151.75	4044.16	5372.55	3704.02	5551.64	6740.69	9625.19	14424.6	17973.4	22067.2	36733.1	37974.9	14443.4	10871.3	7631.51	21219.5	10625.7	+	3.94926	6.66667e-05	6113	19396.4	1.66584	Q9NZK5	Adenosine deaminase CECR1	CECR1_HUMAN
7456550	7619990	5037370	6970750	6259020	9378780	3936370	4725530	12147800	4416320	4804690	3886150	6816160	5107620	9610290	12451200	18421900	15272600	11999600	11403600	12236500	9875530	15296400	12457700	+	5.70466	0	6325940	12902500	1.0283	P00450	Ceruloplasmin	CERU_HUMAN
488314	575092	402408	455614	460614	496724	422528	274739	473582	525387	426510	357265	376239	469591	1006390	774797	1396040	839768	1691530	853451	1275330	785715	1148810	1100820	+	7.0089	0	443186	1087270	1.29473	P05156	Complement factor I	CFAI_HUMAN
41728.8	31489.9	37223.7	37680.4	31072	44325	50024.3	40423.5	34589.2	37723.9	25648.4	31076.2	71529	34983	106315	69158.3	103407	76110	76349	67874.8	158690	99784.8	89967.3	74226.2	+	5.86118	0	39251.2	92188.2	1.23185	O00533	Neural cell adhesion molecule L1-like protein	CHL1_HUMAN
177577	228344	221863	164641	169709	208491	193341	171469	213474	296737	151267	144127	199433	292242	430036	542640	575427	523467	736027	277093	387965	461236	379007	318514	+	6.00353	0	202337	463141	1.19469	P06276	Cholinesterase	CHLE_HUMAN
9954.41	6770.52	9414.11	9931.05	8680.46	14539.6	10074.4	15996.1	7899.67	8682.23	6203.02	8241.15	14631.1	9464.41	33874.7	23592	24555.3	31161.6	36692.8	23197.1	27177.7	17587.8	23584.3	16530.3	+	7.21209	0	10034.4	25795.4	1.36216	Q12860	Contactin-1	CNTN1_HUMAN
171497	147844	82596.4	109865	70387.5	94388.6	93233.9	95832.5	80081	104162	60859.9	109040	84478.5	237242	299886	194513	165601	146518	435694	173271	238735	276173	156893	197311	+	3.47756	0.000333333	110108	228459	1.05302	P10643	Complement component C7	CO7_HUMAN
39539.5	44589.6	18695.9	37076.1	22410.1	31640.2	32008.8	25759.4	12140.1	33360.5	31642	33051.4	36590.4	41142.5	26485	16984	14902.8	11578.6	15165.4	11299.4	614.847	148.751	23513.9	19606.9	+	4.01088	0	31403.3	14030	-1.1624	P49747	Cartilage oligomeric matrix protein	COMP_HUMAN
362258	359927	260068	352042	203013	143125	166298	187605	118081	231962	252558	280401	296452	233561	621666	620870	601205	425609	438644	595272	418621	900008	622310	440029	+	6.23583	0	246239	568423	1.20691	P22792	Carboxypeptidase N subunit 2	CPN2_HUMAN
39960.1	39142	40999.6	80560.2	49265.8	60312.7	58384.7	55701.9	48838.9	39217.5	45475.2	34435.8	41021.8	68650.2	164464	138931	164902	146616	267159	112659	68565.8	137991	163441	98713.1	+	5.8959	0	50140.5	146344	1.54532	Q9NQ79	Cartilage acidic protein 1	CRAC1_HUMAN
132647	107292	80623.8	56649.8	55089.6	88162.8	83864.3	59910.6	63123.7	93148.1	53777.7	82612.8	81866.9	78057.1	195255	99590.7	297394	219552	205132	77026	165154	236970	188950	173425	+	5.11347	0	79773.3	185845	1.22012	P01034	Cystatin-C	CYTC_HUMAN
23942.3	9604.83	17682.1	10942.9	13662.6	12804.3	16101.6	12746.9	13844	14037.8	12213.8	14664.8	11671.9	10906	76706.1	36217.4	92889.4	62650.4	144833	48418.4	30134.3	71501.1	50560.7	37618.8	+	4.89354	0	13916.1	65152.9	2.22707	Q01459	Di-N-acetylchitobiase	DIAC_HUMAN
12871.4	12343.8	11435.1	9978.8	9413.32	11228.4	10964.3	8734.98	11082.9	12962	9315.15	7768.85	9646.78	9001.05	33727.8	16940.9	60530	52854.7	0	16306.1	27772.1	36655.4	40351.4	17624.9	+	3.27042	0.00045	10481.9	30276.3	1.53029	Q13822	Ectonucleotide pyrophosphatase/phosphodiesterase family member 2	ENPP2_HUMAN
29044.3	15864.9	15702.9	7978.78	11934	13645.7	15155.4	27512.3	12335.2	17477.3	6898.25	29839.2	38229.4	12119.6	63639.7	20720.7	38877.9	77309.5	96079.3	26607.6	26153.5	47305.8	49103.4	139038	+	3.15176	0.000470588	18124.1	58483.6	1.69012	Q9UNN8	Endothelial protein C receptor	EPCR_HUMAN
447998	472855	442683	305899	282317	402623	336167	329112	228829	312593	528678	458576	354494	344866	258346	259003	144098	169893	15703.5	228650	92045.2	79397.9	198881	277748	+	4.95578	0	374835	172377	-1.12069	P00742	Coagulation factor X	FA10_HUMAN
39634	33352.7	18076.2	21511.3	32464	23153.2	21724	23264.4	23569.9	29481	25616.8	29053.1	42152.8	30093.6	75185.9	50022.8	114124	25671.5	85393.2	20457.2	30167.3	69295.1	30268.9	66361.6	+	2.59134	0.00194595	28081.9	56694.7	1.01357	P12259	Coagulation factor V	FA5_HUMAN
9848.54	8401.69	16015.9	6094.06	13613	12865	14666.3	14071.4	11304.6	7961.56	20948.2	12637.5	11599.8	9671.19	5371.81	4261.97	805.355	382.529	1216.65	2862.27	5616.88	5860.23	5706.19	4604.35	+	5.64781	0	12121.3	3668.82	-1.72416	P00740	Coagulation factor IX	FA9_HUMAN
13111.3	15231.5	24040.4	8218.48	17121.2	14507.5	16708.8	12196.2	17867.9	16591.8	8991.51	13159.1	11561.3	14733.8	25862.5	20445.3	35811	43959.1	138471	34144.4	17781.8	36194.8	18905.1	16459.3	+	1.69189	0.0187755	14574.3	38803.5	1.41276	P08637	Low affinity immunoglobulin gamma Fc region receptor III-A	FCG3A_HUMAN
19107.6	23729.9	20606.5	18767.4	14471.5	25440.5	19738.6	18840.6	19763.6	16136.9	15242.1	28745.1	35786.8	19853.8	40800.2	23175.2	64848.1	67803	65459.6	24313.9	56999.7	36596.9	44870.4	28416.7	+	4.13749	0	21159.3	45328.4	1.09912	Q9Y6R7	IgGFc-binding protein	FCGBP_HUMAN
97148.4	140569	44497.1	95776.3	135279	65306.2	116152	70778.2	130677	83462.5	117017	100931	89667.1	63220.5	242055	133389	785209	65248.2	428266	156622	222451	201505	138197	156836	+	1.95087	0.00913475	96463	252978	1.39096	Q03591	Complement factor H-related protein 1	FHR1_HUMAN
1521080	1751280	1159030	1210370	1012990	597103	828095	846547	499264	1472900	1052460	1258410	1002620	1594790	546184	249178	156611	290964	192992	459145	225973	278420	482407	410456	+	5.80249	0	1129070	329233	-1.77795	P02751	Fibronectin	FINC_HUMAN
6820.41	4464.71	3860.79	2230.15	1616.96	2710.85	1028.48	3337.97	2465.21	4748.12	2638.93	1286.94	4442.9	3109.83	12302	4128.69	12332.1	14723.3	0	3324.61	3392.41	7076.97	4915.81	2816.23	+	1.56044	0.026702	3197.3	6501.22	1.02386	P04066	Tissue alpha-L-fucosidase	FUCO_HUMAN
290500	399609	349593	483879	279953	153496	290710	334438	81736.8	416466	399743	815155	251432	458119	139177	270547	172658	82672.6	21580	107461	71096.2	259963	206390	89398.6	+	2.83915	0.000989691	357488	142094	-1.33105	P06396	Gelsolin	GELS_HUMAN
31459.9	14810.5	20117.8	10197.1	27735.7	17313.8	36739.8	16708.2	42567	18944.2	10707.8	17052.9	28056.2	20529.6	53235.1	29604.6	157981	79237.6	88989.8	40695.5	47121.9	58574.3	89700.3	38029.4	+	3.61162	0.000173913	22352.9	68317	1.61178	Q92820	Gamma-glutamyl hydrolase	GGH_HUMAN
43316.4	18946.4	17816.9	18624.4	39348.5	20370.3	43990.9	32645.4	22963.6	26500	24206.1	12990	21879.9	4840.2	6664.37	7382.4	4954.65	38112.4	0	8088.14	10981.3	3238.17	8006.2	9515.7	+	2.52156	0.00224561	24888.5	9694.33	-1.36027	Q14520	Hyaluronan-binding protein 2	HABP2_HUMAN
43524.9	18551.8	16184.8	23984.5	8032.12	24095.5	22982.1	15820.6	25543.8	19438.9	31983	19796.7	50759.7	8782.97	18325.2	17263.2	52182.4	62299.7	35200.9	41337.5	330327	38673.6	49694.8	133878	+	1.36602	0.0449383	23534.4	77918.2	1.72719	P02042	Hemoglobin subunit delta	HBD_HUMAN
78539.7	37969.8	83282.2	59527.1	71688.5	96141.4	94028.6	90793.3	56182.3	43312.3	41124.7	34072.2	74570.7	64437.2	199882	192037	153888	179515	265467	135381	80260.8	108341	84582	77737.3	+	3.83718	0.000125	66119.3	147709	1.15961	Q04756	Hepatocyte growth factor activator	HGFA_HUMAN
47040.6	42624.3	30799.6	41298.1	33583.1	39771	30894	34565.5	39777.6	40696.1	29316.1	23123.4	42268.5	14546.2	67791.5	53921.9	109498	84728.5	151340	62068.6	80536.7	60070.2	54957.9	46840.2	+	3.99689	0	35021.7	77175.4	1.13989	P26927	Hepatocyte growth factor-like protein	HGFL_HUMAN
13710.5	14171.6	14312.9	10804.6	9050.52	8467.42	12056.5	11482.7	4175.7	12116	12707.9	15107.6	18289.7	9597.18	8663.71	9943.68	8333.53	0	0	0	0	7357.51	13849	8136.46	+	2.76716	0.00117647	11860.8	5628.39	-1.07541	Q9Y4L1	Hypoxia up-regulated protein 1	HYOU1_HUMAN
30280.9	14944.1	22360	42248.8	22888.6	41950.6	39964.7	19214.7	40525.2	13168.6	30280.7	19753	47703.6	48706.1	76598.5	79448.2	67870.9	44917.7	191509	8915.58	53004	71248.2	67500.2	49532.6	+	2.24348	0.004625	30999.3	71054.5	1.19669	P18065	Insulin-like growth factor-binding protein 2	IBP2_HUMAN
184978	252115	131081	99856.8	137045	155990	141025	122862	118039	110003	117908	162153	104459	76055.3	308152	386423	496754	192619	349494	222884	432554	525927	374167	397278	+	6.65082	0	136684	368625	1.43131	P17936	Insulin-like growth factor-binding protein 3	IBP3_HUMAN
92609.9	77424.5	67147.9	36174.2	66953.3	59403.8	70126.9	72443.9	76683.4	68323.2	47504.1	40690	56646.3	44761.2	155991	128396	109701	186580	192266	0	148019	131502	112195	151662	+	3.80616	0.000119403	62635.2	131631	1.07145	P22692	Insulin-like growth factor-binding protein 4	IBP4_HUMAN
21998.5	29798.8	21816.5	1042.52	15595.3	32025.5	25356.3	18083.3	17566	34737.2	11788.8	24790.3	37581.9	27239.8	104421	158406	127605	51603.9	117614	153268	51398.1	91790.6	51233.5	113163	+	6.42367	0	22815.8	102050	2.16117	P24593	Insulin-like growth factor-binding protein 5	IBP5_HUMAN
30728.4	9881	17471.9	10393.4	12064.6	21700	10732.2	13591.9	13138.8	16654.9	9795.23	17462.3	15622.8	22282.3	41370.9	25481	50673.2	77722.2	126285	22002.4	32198.3	64650.3	28652.6	35131.8	+	3.19477	0.000433735	15822.8	50416.8	1.6719	Q16270	Insulin-like growth factor-binding protein 7	IBP7_HUMAN
2901000	520016	1870500	1242760	2090560	1658530	1914000	1234260	2012290	319985	576574	544107	1978320	1666740	4786060	5574710	2831810	3404990	512078	4416820	4606190	3678460	1869420	5077210	+	3.84975	0.000126984	1466400	3675780	1.32577	P05155	Plasma protease C1 inhibitor	IC1_HUMAN
11263.6	11192.8	6215.6	9637.46	6239.78	9373.74	8604.18	8134.57	7895.47	12650	4936.8	5383.61	7170.29	6835.54	36574.6	17240	21298.1	37568.4	34797.7	13019.4	14908.2	23618.8	27806.4	25535.8	+	6.15892	0	8252.39	25236.8	1.61265	P05362	Intercellular adhesion molecule 1	ICAM1_HUMAN
25191.5	17180.7	21846.4	11719	17371.8	6246.93	23935.2	19896.2	17870.2	11783.6	9290.19	15451.6	15140.9	10599.7	47816.2	43270	71872.7	63462.4	102768	35418.5	55694.6	45970	36146.6	44609.6	+	6.10515	0	15966	54702.9	1.77661	P13598	Intercellular adhesion molecule 2	ICAM2_HUMAN
11853.6	15599.2	19130.2	8121.27	9565.09	24265.9	9127.18	9432.16	11596.8	14185	5601.39	8403.61	7571.41	17559.7	33004.4	19392.6	73222.9	35348.3	75278.7	20782.9	30867.4	24521.8	39931.5	20063.1	+	3.59508	0.000171429	12286.6	37241.4	1.59982	P32942	Intercellular adhesion molecule 3	ICAM3_HUMAN
285770	1480060	72561.4	190105	443882	1203020	441895	175747	869658	180138	1340010	516729	3282210	612972	1662930	118335	3023940	2169560	3958880	862674	2744800	1401330	1242340	474331	+	1.52615	0.0292632	792483	1765910	1.15596	P01861	Ig gamma-4 chain C region	IGHG4_HUMAN
19541.4	14551.3	15473	17973.9	10984.4	25759.5	11793.4	8860.97	14779.1	13206.9	10586.1	11913.2	13283.3	21664.2	0	10775.9	0	0	23507	14440.2	4689.66	16017.3	0	4202.13	+	2.04198	0.00707914	15026.5	7363.22	-1.0291	Q9NPH3	Interleukin-1 receptor accessory protein	IL1AP_HUMAN
17087700	24851200	12267200	20856000	11032700	27521000	10840600	11991800	14875400	26368800	10603600	10986100	18285200	16433800	41410300	28116000	51661800	51300300	57465600	18749700	32438500	38709800	33251700	24373400	+	4.7069	0	16714400	37747700	1.1753	iRT-Kit_WR_fusion	NaN	iRT-Kit_WR_fusion
280556	280728	247312	235514	273962	224412	301245	292185	138646	198164	308694	266949	198315	256686	520934	537531	387094	513720	606475	546907	489661	597253	332656	557447	+	8.41771	0	250241	508968	1.02426	P03952	Plasma kallikrein	KLKB1_HUMAN
75539.4	158112	48729	44577.4	29124.2	82501.6	58944.1	29832	54731.8	23654	76628.6	52208.7	82489.9	193498	473938	467156	411484	577298	1736300	301053	287810	431570	54783	225854	+	2.64748	0.00167273	72183.6	496724	2.7827	P04434	Ig kappa chain V-III region VH (Fragment)	KV310_HUMAN
8222	7542.26	5004.89	2729.66	4909.92	2726.3	2878.1	5895.76	2647.98	5501.51	7129.99	6192.89	1908.68	3077.82	0	0	0	0	0	0	3493.39	0	10892.8	1077.37	+	2.00134	0.00794286	4740.55	1546.35	-1.61619	P18428	Lipopolysaccharide-binding protein	LBP_HUMAN
28657.6	45057.4	38596.1	20823.8	21730.7	25158.9	18078.7	26804.8	15549.2	42873.3	31208.8	37551	16425.6	35282.5	0	0	0	0	0	0	0	0	20678.4	14220.4	+	6.14052	0	28842.7	3489.88	-3.04696	P04180	Phosphatidylcholine-sterol acyltransferase	LCAT_HUMAN
51941.4	357457	292052	94418.1	106933	106020	250185	139349	251012	95955.1	276615	336686	150294	384578	547114	817661	567819	710190	1794420	566712	662381	202178	563855	177711	+	2.87856	0.000968421	206678	661004	1.67727	P04211	Ig lambda chain V region 4A	LV001_HUMAN
80922.1	84210.3	145295	22574.1	49629.7	65283.7	53676.3	91276.4	56295.2	42175.2	36266.9	36271	40852.6	46570.8	236587	124875	312081	332873	808171	95829.7	354767	398874	192542	120455	+	3.44853	0.000324324	60807.1	297705	2.29157	P61626	Lysozyme C	LYSC_HUMAN
25111.2	38109.4	23731.3	22270.6	27273	24047.1	28209.7	28154.4	40418.2	16070.8	16830.9	19311.3	28918.3	32241.1	7863.73	4953.1	0	8358.82	0	11831.8	0	0	13618.5	7957.97	+	7.14037	0	26478.4	5458.4	-2.27827	P33908	Mannosyl-oligosaccharide 1,2-alpha-mannosidase IA	MA1A1_HUMAN
69458.3	60987.3	60745.6	53534.8	34396.7	55261	40540.2	51766.5	39880.6	52406.5	47768.9	58117.1	53233.8	64092.7	12610.3	10305.4	16668.3	4611.75	0	10036.4	16500	6775.15	27402.6	20464.4	+	9.46629	0	53013.6	12537.4	-2.08012	P48740	Mannan-binding lectin serine protease 1	MASP1_HUMAN
57767.2	27308.6	35385.9	60873.9	79026.5	23587.8	28611.9	65040.6	169724	45061.8	22139.9	60761.1	47383	31147.1	105521	60410.8	73602.9	29658.8	105984	92793.7	235168	170579	180467	76629.6	+	2.05716	0.0069781	53844.2	113081	1.07049	P11226	Mannose-binding protein C	MBL2_HUMAN
37982.9	28285.6	32397	26948.1	27868.3	49403.5	56613.7	33441.2	29175.8	39011.3	22701.8	23205.9	40067.5	39879.4	102140	47637.2	103561	107170	161883	40234.9	50719	69357.9	70549.5	64509.5	+	3.81363	0.000121212	34784.4	81776.4	1.23324	P43121	Cell surface glycoprotein MUC18	MUC18_HUMAN
9177.77	4923990	20001.8	7477.67	33944.3	58509.9	11153.3	49765	5245.9	14821	21158.3	35610.8	19132.9	19138.7	2271560	6660590	2369470	3255570	5191050	1960360	3683420	6815530	4457130	1272060	+	4.44469	0	373509	3793670	3.34438	P04220	Ig mu heavy chain disease protein	MUCB_HUMAN
5772.1	6119.23	17869.8	4760.27	3683.17	11009.9	3646.4	5136.22	1705.89	5957.27	3031.33	5726.05	1594.75	9857.62	28554.1	11835.6	4574.64	8065.53	24875.8	7141.79	8682.2	14399.7	16194.7	12448.2	+	2.23903	0.00458915	6133.58	13677.2	1.15697	Q92859	Neogenin	NEO1_HUMAN
13527.8	12167.4	8659.92	11386.6	6077.14	2597.92	8888.57	9637.02	6335.92	13540.5	10108.2	8117.81	12377.3	11944.2	31723.8	9492.38	26833.8	21286	57558.5	18173.5	6894.21	24861.4	19214	18537	+	2.76272	0.00116505	9669.02	23457.5	1.27861	Q15113	Procollagen C-endopeptidase enhancer 1	PCOC1_HUMAN
31085.4	35158.2	15376.8	39042.6	24443.2	55999.7	29448.9	26627.4	25247.7	32820.6	10238.5	17914.9	23496.1	20338.1	96802.2	39468.8	125658	111845	179945	41370.2	24713.8	59138.1	77083.6	62089.1	+	3.36741	0.000368421	27659.9	81811.4	1.56451	Q6UXB8	Peptidase inhibitor 16	PI16_HUMAN
15305.6	7794.77	14119.9	11428.8	12229.9	5631.23	4393.71	19862	4399.94	7672.29	15537.1	21250.5	11131.8	16175.2	9468.97	19369.5	0	0	2709.05	5262.78	4382.5	0	6991.61	0	+	2.17602	0.00525191	11923.8	4818.44	-1.30721	P55058	Phospholipid transfer protein	PLTP_HUMAN
172991	71867.5	62833.4	72353.2	85397.8	36706.5	48715.2	122811	44949.6	91531.3	102791	113940	100955	99226	34318.7	34235.5	51271.9	17957	33604.4	18926.3	39361.8	65922.6	41059.6	31382.2	+	3.45465	0.000328767	87647.8	36804	-1.25186	P27169	Serum paraoxonase/arylesterase 1	PON1_HUMAN
6310.41	15694.7	6932.92	9990.73	7246.27	2335.61	7133.05	7816.51	6144.01	7765.68	13576	11898.6	7682.97	5847.21	28135.2	19965.7	50146.5	24208.6	78729.4	18165.1	25328	25502.1	28282.9	23715.9	+	4.01714	0	8312.48	32217.9	1.95451	Q92954	Proteoglycan 4	PRG4_HUMAN
12193	15973.6	12671.9	8587.17	14912.5	13357	14105	11186.7	17889.4	12295.5	12383.4	12830.1	14217.2	9875.79	38763.1	20078.1	51196.1	33143.1	41808.2	24512.5	19267.5	34782.8	29277.9	27332.4	+	6.16453	0	13034.2	32016.2	1.2965	Q12913	Receptor-type tyrosine-protein phosphatase eta	PTPRJ_HUMAN
22024.9	2763.08	15033.9	31023.3	14825.2	13523	22297.2	12867.1	13998.2	16891.6	13626	16236.8	17463.3	20199	48090.2	55484.5	53739.3	52102.1	71504.8	31497.7	22730	72080.7	48120.6	37309.8	+	6.32639	0	16626.6	49266	1.5671	Q6UX71	Plexin domain-containing protein 2	PXDC2_HUMAN
208237	156220	214440	75998	153794	120499	210585	249167	198255	91705.7	229943	148372	213538	147795	28686.6	49049.8	61339.2	51589.2	50259.3	52365.2	38845.8	57940.8	78370.6	42746.5	+	6.36549	0	172753	51119.3	-1.75677	P35542	Serum amyloid A-4 protein	SAA4_HUMAN
7918.92	3562.46	7088.94	3419.83	10338.7	6456.92	10996.5	6894.85	7619.64	10206.7	3856.3	11552	10402.5	7889.66	0	0	0	0	0	4716.47	0	0	0	2903.39	+	6.38292	0	7728.85	761.986	-3.34242	Q9H299	SH3 domain-binding glutamic acid-rich-like protein 3	SH3L3_HUMAN
25988.4	5973.74	19120.5	21474	17885.6	15736.9	8399.29	15408.5	19265.8	13395.3	8360.06	9632.81	14884.9	10498.9	2076.02	2450.24	5205.88	0	0	0	0	1612.92	4090.94	0	+	6.26192	0	14716	1543.6	-3.25301	P10124	Serglycin	SRGN_HUMAN
3788.79	8415.62	9800.48	6583.93	11726.4	10563.3	9168.49	10944.5	14393.5	15321.9	6296.71	9074.85	9864.07	10440.9	30278.6	23228.7	33101.4	23116.4	19313.9	13847.4	17351.4	22883.7	22801.7	14977.7	+	5.83671	0	9741.67	22090.1	1.18116	Q7Z7G0	Target of Nesh-SH3	TARSH_HUMAN
20246.5	36055.9	16717.6	15854	14725.4	30100.4	15914.9	18220.8	19570.3	25896.2	12259.8	14968.3	12705.3	11486.9	45102.4	44941.2	65962.9	42520.5	87813	17835.6	86135.4	51375.4	40323.9	62135.2	+	5.08801	0	18908.7	54414.5	1.52494	P01033	Metalloproteinase inhibitor 1	TIMP1_HUMAN
50218.8	27788.8	25913.4	36923.5	22371.2	71670	24429.2	43040.3	30908.7	88698.9	45397.7	42011.4	27742.1	21941.9	172327	107290	87350.1	94833.1	316720	81139.9	57536.8	199259	81307.7	92105.7	+	3.29343	0.000405063	39932.6	128987	1.69159	Q66K66	Transmembrane protein 198	TM198_HUMAN
13964.5	106815	17758.9	3897.38	2588.18	3745.17	29152.3	28058.6	22780.9	23555.6	22478.4	23286.6	27408.6	23504.3	49383.1	16488.4	107162	158791	214269	42142.4	49235.3	94337.3	39107.9	28658.1	+	2.1142	0.006	24928.2	79957.4	1.68145	O95497	Pantetheinase	VNN1_HUMAN
4277470	3930950	3522610	4560790	5474090	4592460	5015110	5916500	4832670	6204380	4043490	2522330	4082490	3368910	1262560	1568420	1212670	884855	536127	1232410	1432070	859263	2386770	1962460	+	8.01283	0	4453160	1333760	-1.73933	P04004	Vitronectin	VTNC_HUMAN
3450.72	0	6510.75	0	0	0	0	4143.42	0	0	0	0	3105.33	0	6118.9	8546.58	4497.7	4047.84	2105.47	4506	3829.81	7093.13	4227.91	5570.21	+	3.81603	0.000123077	1229.3	5054.36	2.03969	P04745;P19961;P04746	Alpha-amylase 1;Alpha-amylase 2B;Pancreatic alpha-amylase	AMY1_HUMAN;AMY2B_HUMAN;AMYP_HUMAN
42100.6	43691.1	34182.9	0	23608.1	52411.5	22196.8	24968.6	39355.7	26612.1	29034.8	0	39795.5	26353.5	37801.9	56634.5	67627.9	42652.9	177959	40135.6	57040.7	67138.2	28897.9	34726.1	+	1.77792	0.01425	28879.4	61061.5	1.08022	Q10588	ADP-ribosyl cyclase 2	BST1_HUMAN
27505	30963.4	12179.8	15621.4	2413.49	0	3152.02	3692.96	15711	13383.6	6508.44	2268.43	5076.39	15261.4	39287.1	88124.4	65295.1	83793.3	143734	37010.7	7033.48	32918.4	62610.1	10982.2	+	3.30225	0.000358974	10981.2	57078.8	2.37792	Q86VB7	Scavenger receptor cysteine-rich type 1 protein M130	C163A_HUMAN
7952.55	6785.67	4276.38	2172.97	7074.28	0	2190.33	5147.23	5826.26	0	8807.18	6104.39	6152.41	4035.38	10120.4	5645.43	14606	33644.7	24073.8	6415.8	5568.03	6444.75	9580.62	14998	+	2.39156	0.00328814	4751.79	13109.7	1.46409	P07339	Cathepsin D	CATD_HUMAN
5622.99	0	4630.48	0	2156.87	2300.24	2938.78	4873.93	3165.68	0	0	2318.48	3216.56	0	9759.01	9620	24347.8	12891.6	17633.6	4091.55	13918.6	22823.8	11895.1	10658.8	+	5.83451	0	2230.29	13764	2.6256	P07711	Cathepsin L1	CATL1_HUMAN
20295.2	14227.2	22841.7	11677.3	13700.2	14265.9	18365.2	11546.3	18198.3	16495.7	7466.61	0	12419.3	0	32253.9	39561.2	47323.4	53779.1	31642.5	31927.3	54978.8	52177.3	22441.6	16198	+	5.34719	0	12964.2	38228.3	1.56011	Q9NTU7	Cerebellin-4	CBLN4_HUMAN
5022.37	3768.46	4314.02	0	4554.48	1020.16	4413.24	3466.72	3524.08	1263.11	1907.06	3124	3574.63	4022.13	13779.8	9006.09	23021	12553.5	14275.7	9434.86	6118.28	5432.62	4721.21	6391.64	+	3.94813	6.55738e-05	3141.03	10473.5	1.73743	Q9Y646	Carboxypeptidase Q	CBPQ_HUMAN
1639.15	0	2711.24	1506.8	1952.98	2599.5	3689.15	4622.48	2990.52	2655.28	0	3028.56	2226.32	1396.91	6972.19	5241.13	4960.62	5185.11	8652.97	5289.01	5812.94	10950	5290.26	7319.82	+	5.92315	0	2215.64	6567.41	1.5676	P54108	Cysteine-rich secretory protein 3	CRIS3_HUMAN
6460.4	0	7796.06	0	3384.02	11615.7	10873.9	6341.02	11941	0	0	0	0	932	27087	21903.7	76925.4	18868.8	41309.4	20390.5	12267	8982.03	31033.6	7767.64	+	3.20432	0.000444444	4238.87	26653.5	2.65257	P00488	Coagulation factor XIII A chain	F13A_HUMAN
5031.15	2974.11	3822.53	4133.55	3475.51	0	7229.57	3963.38	4150.72	9080.59	3998.03	7136.13	5668.08	4857.04	16041.1	19809.5	7862.42	6558.62	53612.1	7412.5	7944.91	13547.6	7091.26	10109.4	+	1.86929	0.010965	4680.03	14999	1.68028	P40189	Interleukin-6 receptor subunit beta	IL6RB_HUMAN
7122.63	5642.66	9557.07	0	7593.32	9362.45	7165.12	7401.2	5486.2	7570.99	5670.74	3595.91	4449.33	0	16108	9982.38	10682.9	10132.3	16653.9	8536.79	10076.6	12151.1	10215.3	14840	+	4.38678	0	5758.4	11937.9	1.05181	P11279	Lysosome-associated membrane glycoprotein 1	LAMP1_HUMAN
15614.3	14403.8	15223.1	1496.25	15453.1	29968.7	35540.3	19007	24549.8	0	9236.47	9489.1	21575.7	16251.7	41022.1	22817.8	41948.7	102470	136551	22654.8	68431.4	55318.8	22541.9	49015.1	+	3.06159	0.000629213	16272.1	56277.1	1.79015	Q9Y5Y7	Lymphatic vessel endothelial hyaluronic acid receptor 1	LYVE1_HUMAN
7652.97	7340.37	1017.18	11415.5	6006.61	0	8840.79	8840.65	6343.81	9898.98	5646.24	7501.98	8526.23	9606.58	12210.3	8411.85	24872.3	25108.5	58158	5459.48	12982.2	12064.5	1160	14768.7	+	1.5817	0.0252081	7045.57	17519.6	1.31418	Q13201	Multimerin-1	MMRN1_HUMAN
3050.93	0	1134.99	3154.73	3083.96	0	2936.73	2372.4	2274.31	1901.63	3513.21	4534.07	3314.54	3010.32	6788.18	4823.17	3949.56	4089.51	9146	1858.79	6054.63	5825.68	5203.74	4383.62	+	3.41074	0.00032	2448.7	5212.29	1.0899	P11717	Cation-independent mannose-6-phosphate receptor	MPRI_HUMAN
0	0	4752.57	5148.62	3750.97	0	1543.46	3020.37	0	0	0	4546.82	2364.94	2241.97	9878.48	6890.32	5569.36	6601.76	19872.2	7944.07	10810.2	9539.98	4129.73	3410.14	+	3.92182	6.45161e-05	1954.98	8464.62	2.11429	P98160	Basement membrane-specific heparan sulfate proteoglycan core protein	PGBM_HUMAN
21556.3	11333.2	12513.3	15225.3	4659.66	15102.7	5278.86	8734.24	0	19504.1	21924.9	16745.4	6168.3	0	13496.7	14485.5	19153.5	55977.8	12710.4	12972.7	61700.9	48349.4	18406	26175.9	+	2.19936	0.00504615	11339	28342.9	1.32169	P32119	Peroxiredoxin-2	PRDX2_HUMAN
5640.8	9421.17	8677.97	0	5450.88	6477.82	7592.15	5507.48	0	2011.7	1609.35	4816.57	9228.13	0	20103.8	6511.48	10301.6	11779.9	16238.2	9348.16	7742.29	13923.6	11000.2	7922.25	+	3.53513	0.000169014	4745.29	11487.2	1.27546	P28827	Receptor-type tyrosine-protein phosphatase mu	PTPRM_HUMAN
5757.36	5859.27	0	906.424	0	0	877.048	446.196	0	0	1600.84	1449.16	0	0	28858.5	7908.9	48878.5	43112.5	22277.2	8708.03	25598	14696.8	5219.5	12266.4	+	4.37905	0	1206.88	21752.4	4.17182	Q13228	Selenium-binding protein 1	SBP1_HUMAN
15118	0	0	0	0	0	0	0	0	0	0	0	0	0	8807.13	6687.03	22240.7	20355.5	7334.72	6050.37	21868.5	18618.2	7156.96	9339.56	+	4.52978	0	1079.86	12845.9	3.57239	O75368	SH3 domain-binding glutamic acid-rich-like protein	SH3L1_HUMAN
0	2913.82	5775.45	0	0	0	3184.56	3617.35	2381.86	0	0	0	3579.18	0	16331	10367.2	9236.33	7486.17	18771.1	7530.94	13324	8954.56	8991.42	10376.3	+	7.3033	0	1532.3	11136.9	2.86158	P78324;Q5TFQ8	Tyrosine-protein phosphatase non-receptor type substrate 1;Signal-regulatory protein beta-1 isoform 3	SHPS1_HUMAN;SIRBL_HUMAN
9017.49	0	4019.88	5210.49	4738.65	0	2337.34	3969.14	0	7770.17	9981.77	4445.84	3940.59	0	5796.4	2964.89	8263.14	24251.6	4684.95	3769.53	33531.7	7207.62	4117.82	7994.17	+	1.38394	0.04315	3959.38	10258.2	1.37343	P00441	Superoxide dismutase [Cu-Zn]	SODC_HUMAN
0	26359.6	5302.33	0	9677.09	16077	7677.46	7477.79	5165.42	9244.26	17088.8	13566.3	0	0	41460.8	13783.7	64099.4	10287.9	20927.8	6120.12	82595.1	78822.8	28765.3	3959.34	+	2.3768	0.0033	8402.57	35082.2	2.06184	P02788	Lactotransferrin	TRFL_HUMAN

## Sheet: PTC_TN_change
1	2	3	4	5	6	7	8	9	10	11	12	13	14	15	33	34	35	36	37	38	39	40	41	42	43	44	45	C: Student's T-test Significant TN_PTC	N: -Log Student's T-test p-value TN_PTC	FDR value	N: Mean TN	N: Mean PTC	ratio_PTC/TN	T: SAMPLENAME	T: PG.ProteinDescriptions	T: PG.ProteinGroups
2433.97	3181.64	3976.82	2818.78	4526.35	2829.72	3218.18	4117.95	3092.95	2587.25	3305.58	3090.12	2654.4	1768.65	2934.29	0	0	0	340.804	0	0	842.982	935.147	0	0	0	0	0	+	9.23574	0	3114.45	360.945	-3.10913	P05067	Amyloid beta A4 protein	A4_HUMAN
16012300	8056070	12702600	8253030	7549130	8879790	11809300	11135200	21583600	7407850	6649490	8111030	14341300	8547590	9183420	16065000	34547200	24994000	22675400	23639700	34646600	30357700	25318900	36950200	17363500	18435900	23320300	33757700	+	5.39168	0	10788500	25089700	1.2176	P01011	Alpha-1-antichymotrypsin	AACT_HUMAN
7742.76	15114.9	14172.2	5341.3	13837.1	11243.4	34771.9	17824.5	9826.3	8984.08	11391.5	16626.5	9872.22	32433.4	18645.3	40565.2	15165	36994.1	29858.9	24173.7	37881.7	35897.9	28968.1	32432.1	22492.9	44104.8	27056.3	74291.1	+	3.46939	0.000231884	14941.6	33466.2	1.16337	Q15848	Adiponectin	ADIPO_HUMAN
905268	798014	706640	606677	681342	794602	667333	593872	637198	614776	528331	718223	724935	544997	846425	1098080	1378040	1681340	2002970	3417250	1159440	1380660	1393410	1276740	1108630	1744180	1056930	1535380	+	4.28271	0	680158	1505680	1.14647	P35858	Insulin-like growth factor-binding protein complex acid labile subunit	ALS_HUMAN
15733.1	14756.3	15920.4	29192.1	15565.3	12945.9	12792.4	8527.75	9449.7	20636.7	12321.8	13219.4	15157.2	11871.6	17382.8	21570.7	51437.1	75280.6	35583.4	40386.5	34884.1	38146.2	18824.9	66125.8	29540.4	26835	25418.1	34338.6	+	4.02943	8.16327e-05	14863.5	36839.6	1.30948	P15144	Aminopeptidase N	AMPN_HUMAN
749311	756924	519873	596926	538839	656507	538769	695895	376749	878060	436030	437052	515714	577212	601081	1556830	1582310	1834400	1872620	3348210	702853	1304700	741570	1147160	701130	1430290	839494	772781	+	2.92011	0.000730769	590990	1316820	1.15585	P01019	Angiotensinogen	ANGT_HUMAN
1639600	1924750	1807830	1780070	1994210	2013580	2328680	1904190	2468600	1715510	1724140	1745870	2335780	2247150	1948040	12333500	1120190	642632	802908	1115920	2452530	613433	2057990	842977	15897400	17759000	11461800	17249200	+	1.47058	0.0248966	1973570	6164110	1.64308	P01008	Antithrombin-III	ANT3_HUMAN
7164890	6274840	11942300	10823900	7704340	6643920	14112600	16744700	6543210	9714770	16768800	8437010	8414500	14901100	6466250	12563000	1092590	917096	2009290	2659020	4441480	1960130	5725500	1286600	3134530	2526580	2223510	1353450	+	4.81927	0	10442200	3454210	-1.596	P02647	Apolipoprotein A-I	APOA1_HUMAN
936645	1059140	1324900	637232	554630	442845	1072480	1551190	809314	768870	1923020	816788	847701	1069810	474338	739670	151389	296568	217254	363002	248723	215080	404780	91856	388826	441762	552009	250606	+	5.0768	0	986753	345419	-1.51434	P02652	Apolipoprotein A-II	APOA2_HUMAN
6202700	3944540	4592610	3551300	4361750	4490260	5895390	7512830	1329520	4089530	3969040	3103360	3942360	4718810	2930210	8479080	106383	108279	122742	274076	167652	214875	320539	424170	390389	347008	270954	236603	+	4.12052	8.51064e-05	4407430	1028070	-2.1	P06727	Apolipoprotein A-IV	APOA4_HUMAN
148302	97425.9	99933.7	65555.9	89409.2	76614	103113	89424.6	132144	97018.2	123554	100183	111740	118780	119843	166678	43558	26441.2	32835.9	28270.7	33625.1	3312.73	26165.3	104159	25269.2	33493.3	14556.6	20756.3	+	3.3191	0.00035443	103800	48497.5	-1.09782	P20851	C4b-binding protein beta chain	C4BPB_HUMAN
34172.8	12405.3	8917.02	7946.92	7934.1	4998.26	8818.06	7411.29	4162.86	16707.7	14294	11941.7	12631	3846.64	9789.59	15984.4	17243.1	39827.2	48340.4	59003.2	26300.3	23605	14483.4	11463.7	18600.2	20162.2	8361.45	14031.7	+	1.90127	0.00758904	11156.3	23371.1	1.06687	P00918	Carbonic anhydrase 2	CAH2_HUMAN
9553.77	6880.65	3394.27	6158.99	9935.29	11531.4	8902.18	8484.99	11206.8	10339.1	4821.06	4113.54	10431.7	10758.3	7015.89	17752	21391.2	19546	15628.6	24419.5	14846.1	21270.4	19648.8	18591.5	24702.8	32624.1	32004	33133.2	+	5.96442	0	8322.29	21612.4	1.37681	Q13740	CD166 antigen	CD166_HUMAN
37932.3	26258.6	31885.2	16261.2	26791.1	23610.4	39066.6	25729.6	28210.4	19520.1	16479.2	23347.7	30646.4	27100.8	21453.4	81195.5	110029	167107	92694.8	168906	66082.9	73253.9	60368.9	125741	73040.2	61071.4	58196.9	94712.8	+	5.13767	0	26631.4	89561	1.74974	P16070	CD44 antigen	CD44_HUMAN
8285.27	7814.18	6465.63	4544.75	5986.12	6134.75	6161.38	5151.75	4044.16	5372.55	3704.02	5551.64	6740.69	9625.19	4789.92	9410.15	14693.5	17131	15273	14572.1	16370.1	18493.2	20199.2	26517.3	20972.1	10336.7	16314.9	12840.9	+	5.95483	0	6113	15565.3	1.34838	Q9NZK5	Adenosine deaminase CECR1	CECR1_HUMAN
7456550	7619990	5037370	6970750	6259020	9378780	3936370	4725530	12147800	4416320	4804690	3886150	6816160	5107620	5251180	10477900	17117100	24106400	18808500	16931500	18725100	17556700	12532100	19977300	13417100	15045900	15635100	21920800	+	6.6487	0	6325940	16250200	1.36111	P00450	Ceruloplasmin	CERU_HUMAN
488314	575092	402408	455614	460614	496724	422528	274739	473582	525387	426510	357265	376239	469591	515695	303793	1351160	2930290	1972660	2735680	1194430	1255610	989172	2041640	711337	877997	326754	710158	+	2.98697	0.00064	443186	1279740	1.52987	P05156	Complement factor I	CFAI_HUMAN
177577	228344	221863	164641	169709	208491	193341	171469	213474	296737	151267	144127	199433	292242	227634	148092	1047000	881901	286178	628578	411244	431518	376669	696204	277327	249056	381106	349225	+	2.84774	0.000763636	202337	456552	1.17402	P06276	Cholinesterase	CHLE_HUMAN
61143.3	132338	90044	76311.3	32888.8	76891.2	79558.7	73593.6	53673.7	74447.6	42732.6	64021.3	67656.7	38200.1	42121.9	84211.6	22219.8	13437.6	29883.4	42160.1	19288.4	20477.3	14303.8	16278.8	43163.2	36996	37152	20284.7	+	3.88635	7.40741e-05	68821.5	31569.9	-1.12431	Q96KN2	Beta-Ala-His dipeptidase	CNDP1_HUMAN
9954.41	6770.52	9414.11	9931.05	8680.46	14539.6	10074.4	15996.1	7899.67	8682.23	6203.02	8241.15	14631.1	9464.41	10053	31116.9	18811.4	29924	23659.1	29893	23488.3	20141	29335.1	22100	24192.7	24457	12937.1	34043.6	+	6.62206	0	10034.4	23868	1.25012	Q12860	Contactin-1	CNTN1_HUMAN
39539.5	44589.6	18695.9	37076.1	22410.1	31640.2	32008.8	25759.4	12140.1	33360.5	31642	33051.4	36590.4	41142.5	20715.5	40656.5	11389.6	5936.57	6564.87	13035.1	9506.91	8619.19	16770.5	16235.1	11145.2	21631	6520.76	984.324	+	4.52295	0	31403.3	13550.8	-1.21254	P49747	Cartilage oligomeric matrix protein	COMP_HUMAN
1063600	745341	877344	800588	1010000	855842	832830	1021270	1029550	598484	568373	414463	637851	473622	527147	1382640	2369760	2198400	2694590	4074470	2344520	2188350	1563660	3626480	1688760	2034750	1613480	1348700	+	4.82073	0	780654	2118270	1.44013	P02775	Platelet basic protein	CXCL7_HUMAN
23942.3	9604.83	17682.1	10942.9	13662.6	12804.3	16101.6	12746.9	13844	14037.8	12213.8	14664.8	11671.9	10906	11612.3	2427.28	58016	73237	55282.9	82946	41976	57188.4	75312.5	96361	7341.94	7803.06	6112.12	5424.35	+	2.2679	0.00273684	13916.1	41502.9	1.57646	Q01459	Di-N-acetylchitobiase	DIAC_HUMAN
47580	103278	135088	9477.41	47270.4	112701	27916.2	54579.5	51211	19405.5	39784.1	42706.7	59078.3	47079.5	25338.8	40946.1	262301	390212	265655	300426	216227	71390.5	184238	294274	65142	209419	10287.3	199639	+	3.02125	0.000612245	56939.6	181107	1.66934	P09172	Dopamine beta-hydroxylase	DOPO_HUMAN
447998	472855	442683	305899	282317	402623	336167	329112	228829	312593	528678	458576	354494	344866	359970	494204	93106.3	44622.8	125080	248346	171709	215303	160042	15014.7	229978	161396	116396	91097.4	+	4.20477	0	374835	180447	-1.05468	P00742	Coagulation factor X	FA10_HUMAN
49134	73493.9	56400.2	54641.7	44510.3	52305	80040.5	44718.9	60416.3	43230.9	54108.6	50055.9	49520.5	40118.4	46195.4	108465	89050.7	235531	193965	274273	117156	135273	160715	182508	107498	97465.1	114897	118382	+	4.76197	0	53763.9	141527	1.39637	P03951	Coagulation factor XI	FA11_HUMAN
13111.3	15231.5	24040.4	8218.48	17121.2	14507.5	16708.8	12196.2	17867.9	16591.8	8991.51	13159.1	11561.3	14733.8	15611.3	23424.1	48626.4	46031.8	24283.6	63239.7	29875.2	25128.9	42125.1	82850.6	17472.6	18902	58340.7	23531.7	+	3.40771	0.00027027	14574.3	37103.1	1.34811	P08637	Low affinity immunoglobulin gamma Fc region receptor III-A	FCG3A_HUMAN
660808	301558	527877	340250	59614.6	251078	224976	329805	482584	89375.1	192128	414981	346721	423435	513016	309654	427962	1276150	1014680	807304	580109	363486	818930	1167940	514014	443560	866715	926602	+	3.45136	0.000225352	331799	716437	1.11053	O75636	Ficolin-3	FCN3_HUMAN
4824350	5421100	5205290	3405970	3222180	3590100	4183690	5019230	2476570	6365850	4471310	4393280	3617450	3630740	3658290	5417110	2047860	1064120	1353320	1777660	1239640	840027	3235500	1848520	1605790	1905660	955781	460930	+	4.65057	0	4273360	1957870	-1.12609	P02765	Alpha-2-HS-glycoprotein	FETUA_HUMAN
97148.4	140569	44497.1	95776.3	135279	65306.2	116152	70778.2	130677	83462.5	117017	100931	89667.1	63220.5	89718.1	95887.5	1067050	1468290	94067.7	2060480	201452	168617	103587	1208010	365188	1703110	654204	1368500	+	2.83114	0.00075	96463	760583	2.97906	Q03591	Complement factor H-related protein 1	FHR1_HUMAN
55864.3	51864.9	75925.7	30181.5	25738	87206	50154	80357.7	21871.2	19429.1	22001.1	23851.3	73210.6	13598.9	31104.4	52459.9	80476.1	116094	90686.4	53987.4	104892	75364.1	33969.7	103734	131774	163181	239500	195582	+	2.66374	0.00112821	45089.6	105200	1.22227	P02671	Fibrinogen alpha chain	FIBA_HUMAN
1521080	1751280	1159030	1210370	1012990	597103	828095	846547	499264	1472900	1052460	1258410	1002620	1594790	1212560	786095	200827	102814	152161	361959	343255	227852	372701	161432	471994	618374	254040	153726	+	5.35072	0	1129070	387128	-1.54425	P02751	Fibronectin	FINC_HUMAN
6820.41	4464.71	3860.79	2230.15	1616.96	2710.85	1028.48	3337.97	2465.21	4748.12	2638.93	1286.94	4442.9	3109.83	4076.07	3172.47	44013.7	63504.2	59093.9	46495.2	5893.87	11256.4	22836.2	18873.4	7684.34	16925.1	19895.2	13784.3	+	3.10236	0.000444444	3197.3	24107.5	2.91456	P04066	Tissue alpha-L-fucosidase	FUCO_HUMAN
290500	399609	349593	483879	279953	153496	290710	334438	81736.8	416466	399743	815155	251432	458119	227180	362709	122828	50749.8	136138	114383	95142.7	96554.5	177689	73641.3	261015	238684	90665.1	46026	+	3.3058	0.00035	357488	149529	-1.25747	P06396	Gelsolin	GELS_HUMAN
31459.9	14810.5	20117.8	10197.1	27735.7	17313.8	36739.8	16708.2	42567	18944.2	10707.8	17052.9	28056.2	20529.6	18336.1	29248.8	68107.8	108331	64171.8	308022	67794.5	44448.1	88765.3	55546	40274.2	80272.9	64190.1	75132.1	+	2.26127	0.00272593	22352.9	79474.3	1.83003	Q92820	Gamma-glutamyl hydrolase	GGH_HUMAN
89301.8	82177.8	30455.2	53441.9	45666.7	95257.3	53484.6	47291.7	95817.4	60955.7	34689.9	65089.7	43200.8	76783.8	57383	73230.1	188440	156459	166860	165206	90883.9	80297.2	92343.3	268343	115694	80913.7	161025	167696	+	3.59207	0.000193548	62401	133198	1.09393	P22352	Glutathione peroxidase 3	GPX3_HUMAN
391003	461475	368696	293151	208582	113358	189602	295139	106815	455162	506913	431013	198252	392794	331833	326929	110285	49442.4	112618	142100	115478	82467.1	186290	41586.1	181180	216360	40452.5	45576	+	3.24814	0.000439024	315140	141614	-1.15403	P05546	Heparin cofactor 2	HEP2_HUMAN
251929	172233	111009	287131	215334	142933	396198	281741	183361	379661	237980	75620.2	269232	162770	146963	300782	79890.6	85628.9	46899.7	107228	68827.9	53455.2	142387	89971.8	37533.7	40500.8	54038.7	93031.8	+	3.561	0.000184615	226224	96224.2	-1.23328	P04196	Histidine-rich glycoprotein	HRG_HUMAN
13710.5	14171.6	14312.9	10804.6	9050.52	8467.42	12056.5	11482.7	4175.7	12116	12707.9	15107.6	18289.7	9597.18	9887.58	16026.1	0	0	2126.64	0	1304.33	0	0	0	13529.9	13409.6	0	0	+	3.50006	0.000235294	11860.8	4020.3	-1.56083	Q9Y4L1	Hypoxia up-regulated protein 1	HYOU1_HUMAN
184978	252115	131081	99856.8	137045	155990	141025	122862	118039	110003	117908	162153	104459	76055.3	125439	154299	391755	489476	436163	612298	248074	352940	231266	568426	286162	530778	594070	393191	+	5.16523	0	136684	386738	1.50051	P17936	Insulin-like growth factor-binding protein 3	IBP3_HUMAN
21998.5	29798.8	21816.5	1042.52	15595.3	32025.5	25356.3	18083.3	17566	34737.2	11788.8	24790.3	37581.9	27239.8	22444.8	59524.5	101309	60827.2	31618.1	61568.2	52290.6	39050.2	64839.3	87071.2	186271	59429.5	62046	43437.9	+	3.30269	0.000345679	22815.8	66552	1.54445	P24593	Insulin-like growth factor-binding protein 5	IBP5_HUMAN
2901000	520016	1870500	1242760	2090560	1658530	1914000	1234260	2012290	319985	576574	544107	1978320	1666740	2024580	4578350	3210970	3471500	5450390	8010790	4609170	4783150	2796320	1084970	3731010	2962090	2506220	4543660	+	4.21544	0	1466400	3840230	1.38891	P05155	Plasma protease C1 inhibitor	IC1_HUMAN
11263.6	11192.8	6215.6	9637.46	6239.78	9373.74	8604.18	8134.57	7895.47	12650	4936.8	5383.61	7170.29	6835.54	3641.3	19764.4	31587.5	24794.1	21421.2	22243.9	23901	18868.5	29716.7	35529.1	18953.1	13771.8	17114.8	20086.8	+	5.68675	0	8252.39	21528.1	1.38334	P05362	Intercellular adhesion molecule 1	ICAM1_HUMAN
25191.5	17180.7	21846.4	11719	17371.8	6246.93	23935.2	19896.2	17870.2	11783.6	9290.19	15451.6	15140.9	10599.7	13598.7	25353.1	48597.6	108070	29833.4	101576	38327.2	47195.6	32697.4	85689.3	46232.9	27055.6	56456.9	58128.9	+	3.92922	7.84314e-05	15966	51343.7	1.68518	P13598	Intercellular adhesion molecule 2	ICAM2_HUMAN
2233000	5010890	40118800	11301100	7008900	8374360	11530200	3182660	6541480	4264320	34130500	27293900	20001100	37039100	12758200	7351890	8994730	1430560	2619300	2851300	10260500	14629500	3608930	7092030	9777160	3068470	8041650	8858520	+	1.44228	0.0266893	15573600	7238760	-1.10529	P01876	Ig alpha-1 chain C region	IGHA1_HUMAN
578131	1267980	10123000	2512730	1564220	1753200	2629540	772603	1581430	1314300	7181320	7282380	5419200	6641380	2997830	1140120	1491820	346437	520983	606755	1528610	3952380	719442	1262740	1998620	864306	1745140	2385900	+	1.6182	0.0164048	3615810	1540080	-1.23131	P01877	Ig alpha-2 chain C region	IGHA2_HUMAN
280556	280728	247312	235514	273962	224412	301245	292185	138646	198164	308694	266949	198315	256686	398497	391094	1003930	1002010	825798	1856760	361664	467386	861014	606510	798492	1090750	688716	1177620	+	4.81209	0	250241	823588	1.7186	P03952	Plasma kallikrein	KLKB1_HUMAN
8222	7542.26	5004.89	2729.66	4909.92	2726.3	2878.1	5895.76	2647.98	5501.51	7129.99	6192.89	1908.68	3077.82	5014.87	4090.07	2861.02	0	0	0	3301.94	0	2968.88	0	5009.19	0	0	0	+	3.23109	0.000418605	4740.55	1660.43	-1.5135	P18428	Lipopolysaccharide-binding protein	LBP_HUMAN
28657.6	45057.4	38596.1	20823.8	21730.7	25158.9	18078.7	26804.8	15549.2	42873.3	31208.8	37551	16425.6	35282.5	8459.76	37302.2	7826.9	0	6149.08	14197	9282.22	13378.7	24739.1	0	17709.6	7132.02	0	0	+	4.18215	0	28842.7	10441.2	-1.46592	P04180	Phosphatidylcholine-sterol acyltransferase	LCAT_HUMAN
73003.1	171579	139524	133994	84324.1	140320	66808.7	81174	191765	127220	70406.2	71621.1	60261.8	276913	131375	112454	30362.3	19735.9	26408.3	40085.7	38140.2	19390.4	45963.5	34851.1	60031.6	26329.7	46268.3	22173.1	+	3.24054	0.000428571	120637	46683.5	-1.36969	Q08380	Galectin-3-binding protein	LG3BP_HUMAN
6884.88	17582.3	5106.5	6272.63	5020.33	3919.28	5740.06	7008.49	3442.45	10576.2	5193.75	3810.06	4993.79	6547.55	15798.5	6982.78	14519.8	23378.1	12265.1	21188.9	8065.74	12321	12702.1	22040.9	6110.41	8413.33	15161.8	8063.8	+	3.04533	0.000510638	6578.45	13358	1.02188	Q07954	Prolow-density lipoprotein receptor-related protein 1	LRP1_HUMAN
10697.5	86253.5	64267.1	17832.4	38659	33811	55058.4	50588.9	44386.2	34700.2	85424.8	72818.6	99745.7	64768.6	37102.3	14949.8	18423.6	6884.91	14472.5	0	46739.9	22226.8	17642.7	20511.7	13611.8	6989.14	69194.9	31391.3	+	2.95694	0.000627451	54215.1	22867.2	-1.24542	P04209	Ig lambda chain V-II region NIG-84	LV211_HUMAN
80922.1	84210.3	145295	22574.1	49629.7	65283.7	53676.3	91276.4	56295.2	42175.2	36266.9	36271	40852.6	46570.8	29818.6	77637.1	471079	575046	272724	326842	280081	296505	187142	506199	178254	405677	355345	265260	+	5.25396	0	60807.1	301972	2.3121	P61626	Lysozyme C	LYSC_HUMAN
25111.2	38109.4	23731.3	22270.6	27273	24047.1	28209.7	28154.4	40418.2	16070.8	16830.9	19311.3	28918.3	32241.1	25525.8	48133.6	2042.7	0	3179.34	3286.45	2694.71	0	2736.32	0	0	8736.12	3027.25	0	+	4.16947	0	26478.4	7097.3	-1.89947	P33908	Mannosyl-oligosaccharide 1,2-alpha-mannosidase IA	MA1A1_HUMAN
69458.3	60987.3	60745.6	53534.8	34396.7	55261	40540.2	51766.5	39880.6	52406.5	47768.9	58117.1	53233.8	64092.7	49616.5	73992.1	10539.8	16089.7	13964.2	39269.2	23917	18254.3	18448.1	7556.33	22964.9	20092.5	8084.68	10493.2	+	4.68759	0	53013.6	23805.9	-1.15504	P48740	Mannan-binding lectin serine protease 1	MASP1_HUMAN
89399	54445.1	48764.7	74323.3	24900	38542.2	41603.4	45957.2	58361.1	48666.8	34090.7	75181.5	79342.6	68674.4	61088.5	88601.6	0	9154.71	6500.97	30036.9	20491.7	13687.2	10242.2	10538.4	16240.8	22250.5	11121	20896.3	+	3.37813	0.000315789	55875.1	22917.9	-1.28573	O00187	Mannan-binding lectin serine protease 2	MASP2_HUMAN
57767.2	27308.6	35385.9	60873.9	79026.5	23587.8	28611.9	65040.6	169724	45061.8	22139.9	60761.1	47383	31147.1	40960.9	144252	255231	272347	60946.7	89901.5	162388	163846	33894.7	189801	262520	111098	138654	98287.3	+	3.18401	0.000413793	53844.2	144581	1.42502	P11226	Mannose-binding protein C	MBL2_HUMAN
37982.9	28285.6	32397	26948.1	27868.3	49403.5	56613.7	33441.2	29175.8	39011.3	22701.8	23205.9	40067.5	39879.4	24592.9	80858.4	54948.8	134272	65674.9	150697	48943	66068.7	84186	94452.4	68685.6	47915.5	41345.2	62498.8	+	3.33265	0.000358974	34784.4	73224.3	1.07388	P43121	Cell surface glycoprotein MUC18	MUC18_HUMAN
172991	71867.5	62833.4	72353.2	85397.8	36706.5	48715.2	122811	44949.6	91531.3	102791	113940	100955	99226	75541.1	163995	28648.5	19019.7	21453.7	32951.5	31493.1	25749.5	39001.2	19839.7	57298.3	47434.6	23349.1	15419.3	+	2.41086	0.002208	87647.8	42942.4	-1.02932	P27169	Serum paraoxonase/arylesterase 1	PON1_HUMAN
6310.41	15694.7	6932.92	9990.73	7246.27	2335.61	7133.05	7816.51	6144.01	7765.68	13576	11898.6	7682.97	5847.21	10176.2	3696.99	48703.9	24926.7	29014.3	28792.5	19602.7	17968.5	23144.6	83748.9	43316	22566.7	30488.9	7142.19	+	2.87557	0.000785047	8312.48	28092.1	1.75681	Q92954	Proteoglycan 4	PRG4_HUMAN
88078.3	93561.3	100091	206869	99547.5	84183.8	87361.5	58921.5	63005.3	206669	35503.1	47221	125144	97590.5	91798.5	327234	339978	694095	446664	1190090	216379	181747	148417	421989	209731	285804	126129	173203	+	2.37206	0.00224615	99553.3	346661	1.79998	P27918	Properdin	PROP_HUMAN
157448	132588	106080	65542.3	81722.5	109888	86837.3	87218.2	101171	91253.5	131298	129878	91403.2	104076	82070.8	169099	66402.6	27606	43055.4	46565.1	9335.02	6346.46	13544.7	25266.5	14843.1	40631	29058.7	24391.6	+	4.23383	0	105457	42729.7	-1.30334	P07225	Vitamin K-dependent protein S	PROS_HUMAN
6198.64	2175.92	4691.42	2826.96	2457.32	3673.61	4258.47	3634.31	3690.87	4484.57	2208.61	3136.21	4747.15	2535.81	2926.32	6875.11	11668.8	9923.19	10424.8	11281.4	7555.91	9260.13	5103.21	16107.1	5603.93	8314.64	7109.16	7141.19	+	4.76802	0	3622.85	8521.06	1.23391	P23470	Receptor-type tyrosine-protein phosphatase gamma	PTPRG_HUMAN
208237	156220	214440	75998	153794	120499	210585	249167	198255	91705.7	229943	148372	213538	147795	156853	122324	55157.9	102982	44471.1	63831	46498.6	34494.3	65662.7	86903	99791.5	109090	165929	51065.6	+	4.25502	0	172753	86075.3	-1.00504	P35542	Serum amyloid A-4 protein	SAA4_HUMAN
31913.7	28452.7	26377.6	40355.6	33212.3	39997	52453.5	29829.8	47654.3	29688.3	32081.2	10660.9	31723.5	32659.2	22488.4	40315.8	0	3009.03	1233.56	0	5207.36	0	0	0	5027.49	7121.76	21380.5	4789.11	+	5.76051	0	33361.4	7898.07	-2.07861	P09486	SPARC	SPRC_HUMAN
21831.2	19173.4	16926.3	4312.05	12608.5	7637.52	12768.5	9893.32	6446.47	11493.8	16994.5	20399	12998.6	13460.8	20740	26373.8	16005.8	16648.8	77519.6	21765.9	37902.7	26510.6	5247.56	27300.2	25984.2	44573	39673.3	13079	+	2.30894	0.00260606	13353.1	28523.2	1.09496	P37802	Transgelin-2	TAGL2_HUMAN
3788.79	8415.62	9800.48	6583.93	11726.4	10563.3	9168.49	10944.5	14393.5	15321.9	6296.71	9074.85	9864.07	10440.9	11493.8	16190.3	22780.9	34755.1	27514.8	35339.5	24000.6	21835.3	16087.2	59707.9	11532.3	17253.3	14064.9	17655.1	+	3.23558	0.000423529	9741.67	23586.5	1.27572	Q7Z7G0	Target of Nesh-SH3	TARSH_HUMAN
55577.6	51342.1	33761.7	30534.7	23733.2	75038.6	18964.4	25793.3	28843.4	33086.3	29744.2	19981.7	37663.3	48098.5	31532.2	162911	66040.7	242422	121917	146104	64961.1	48307.4	32811.4	49733.2	76900.2	104278	77927.6	161107	+	3.00434	0.000646465	36583.1	99068	1.43724	P05543	Thyroxine-binding globulin	THBG_HUMAN
50218.8	27788.8	25913.4	36923.5	22371.2	71670	24429.2	43040.3	30908.7	88698.9	45397.7	42011.4	27742.1	21941.9	19227.3	146285	164798	93487.8	57016.5	128422	75451.5	86970.4	98742.2	209813	92375.5	38196.5	116148	119713	+	3.78771	0.000214286	39932.6	103332	1.37165	Q66K66	Transmembrane protein 198	TM198_HUMAN
13964.5	106815	17758.9	3897.38	2588.18	3745.17	29152.3	28058.6	22780.9	23555.6	22478.4	23286.6	27408.6	23504.3	46335	11616.3	84579.5	105185	47444.1	63986.2	133348	80845.1	28630.8	264473	28635.7	18951.7	17516.3	11125.1	+	1.42164	0.0286067	24928.2	67333.6	1.43355	O95497	Pantetheinase	VNN1_HUMAN
4277470	3930950	3522610	4560790	5474090	4592460	5015110	5916500	4832670	6204380	4043490	2522330	4082490	3368910	2183030	5269640	225423	435481	1081950	1306940	1544490	1415650	2829360	665873	1485440	2132520	1185200	1219970	+	6.21828	0	4453160	1641500	-1.43981	P04004	Vitronectin	VTNC_HUMAN
0	0	7458.15	4097.31	8853.13	0	5354.33	3308.28	2844.02	3627.31	0	0	3838.11	0	7852.98	2932.65	14569.6	10518.2	15278.4	9682.07	10785.5	10277.3	20798.4	17662.5	3857.36	10197.8	13803.5	5273.47	+	4.63889	0	2812.9	10963.6	1.96259	P12821	Angiotensin-converting enzyme	ACE_HUMAN
3450.72	0	6510.75	0	0	0	0	4143.42	0	0	0	0	3105.33	0	2655.4	8639.69	4679.37	9105.56	7982	13259.7	7908.64	10300.2	7402.03	18985.5	8380.1	6725.75	5760.32	5486.21	+	5.50623	0	1229.3	8376.46	2.7685	P04745;P19961;P04746	Alpha-amylase 1;Alpha-amylase 2B;Pancreatic alpha-amylase	AMY1_HUMAN;AMY2B_HUMAN;AMYP_HUMAN
9394.07	0	2278.08	3175.32	4300.41	0	5624.43	3457.25	4577.74	3485.72	3239.12	4077.82	4944.59	2842.17	3403.68	5317.04	6874.04	13914.4	8192.5	13655.6	7462.81	7151.04	14493.3	13942.7	3887.63	6557.25	4902.75	6281.45	+	3.05443	0.000521739	3671.19	8288.3	1.17483	P54802	Alpha-N-acetylglucosaminidase	ANAG_HUMAN
4175.38	437.208	2685.95	0	2721.45	2063.93	3180.8	2178.36	2144.86	4391.21	1048.65	1847.19	2294.74	1985.49	2131.08	7464.92	7796.38	13022.3	7275.49	13227.8	3297.85	5376.58	2883.8	8319.12	5658.99	4747.8	3827.3	8038.35	+	3.97746	8e-05	2225.37	6647.7	1.57881	Q9BY67	Cell adhesion molecule 1	CADM1_HUMAN
7952.55	6785.67	4276.38	2172.97	7074.28	0	2190.33	5147.23	5826.26	0	8807.18	6104.39	6152.41	4035.38	10103.1	6039.77	15780.5	10443.7	14434.2	15326.5	9224.11	6696.48	12267.1	23374.9	8758.68	15462.6	6644.29	5857.66	+	3.78256	0.000210526	4751.79	11458.1	1.26982	P07339	Cathepsin D	CATD_HUMAN
5622.99	0	4630.48	0	2156.87	2300.24	2938.78	4873.93	3165.68	0	0	2318.48	3216.56	0	8287.47	8080.41	21745.2	17639.3	13781.6	25084.2	7488.16	8888.25	7045.67	14767.9	8762.67	12112.3	9080.84	8423.13	+	5.81808	0	2230.29	12227.7	2.45485	P07711	Cathepsin L1	CATL1_HUMAN
21376.6	21056	20546.9	0	14980	14924.8	0	11375.9	9615.58	0	0	0	0	0	0	19971.8	22540.3	34648.2	33021.2	34034	20472.3	12006.7	26379.9	45820.7	16172	22279.9	21044.9	8141.53	+	2.91713	0.000761905	8133.98	22609.5	1.4749	Q9UBR2	Cathepsin Z	CATZ_HUMAN
20295.2	14227.2	22841.7	11677.3	13700.2	14265.9	18365.2	11546.3	18198.3	16495.7	7466.61	0	12419.3	0	15715.1	12902.9	76401	51356	46341.1	43933	50443	50850.9	29923.8	26946.1	37615.9	36408.1	104819	62475.6	+	4.43688	0	12964.2	46152.3	1.83187	Q9NTU7	Cerebellin-4	CBLN4_HUMAN
5022.37	3768.46	4314.02	0	4554.48	1020.16	4413.24	3466.72	3524.08	1263.11	1907.06	3124	3574.63	4022.13	2125.43	7781.91	8887.25	16810	15127.7	16757	8554.76	9385	29818.3	19947.6	9499.16	7045.74	15490.1	17005.8	+	4.77834	0	3141.03	13159.7	2.06682	Q9Y646	Carboxypeptidase Q	CBPQ_HUMAN
0	809.083	2319.79	0	0	0	1985.92	1918.2	1787.34	0	1696.04	1074.57	2543.41	2098.15	3580.9	4942.68	13601.4	3340.11	11583.9	32594.4	4480.41	5276.33	4986.58	5726.39	7968.06	5015.16	5546.23	2812.93	+	2.51652	0.00142149	1159.46	7961.1	2.77951	Q8IWV2	Contactin-4	CNTN4_HUMAN
3941.77	0	0	0	8978.3	3484.58	9985.33	2358.48	5360.48	7194.73	2681	2874.54	5198.95	6629.77	2306.66	5479.37	5340.93	11030.7	13935.8	11060.2	13154.4	11553.4	8916.76	12164	7703.31	8542.98	6464.92	9140.26	+	3.24305	0.000433735	4192	9056.69	1.11135	P02452	Collagen alpha-1(I) chain	CO1A1_HUMAN
0	10991.1	9117.92	9017.79	0	0	0	6670.19	5255.87	0	2861.74	5940.99	2339.87	6006.54	0	4966.38	11883.7	12544.7	6099.4	11816.6	6347.72	5953.41	5355.17	15592.7	13779	9812.19	10292.9	6502.78	+	2.11533	0.0038	4157.28	8639.05	1.05523	P20023	Complement receptor type 2	CR2_HUMAN
9483.68	0	21412	0	0	0	10585.9	12550.3	7849.26	0	0	4553.43	3505.7	6040.07	5770.31	9358.86	17738.9	26959.4	24273	9883.16	18453.4	15005.6	10097.5	20837.7	10206.6	17391.2	10923.8	24211.2	+	3.55943	0.000181818	5427.17	15793.6	1.54107	Q14574	Desmocollin-3	DSC3_HUMAN
6460.4	0	7796.06	0	3384.02	11615.7	10873.9	6341.02	11941	0	0	0	0	932	5494.17	30084.1	22712.7	14136.7	42367.4	29200.9	42017.1	28691.4	33534.1	93334	35523.7	22154.4	19958.9	26131.7	+	4.39456	0	4238.87	31810.1	2.90773	P00488	Coagulation factor XIII A chain	F13A_HUMAN
34577.1	46012.3	18694.1	0	1954.8	0	0	15887	0	3752.94	0	9175.71	0	0	0	13275.8	35806.4	18081.8	26012.5	25003.8	38886.6	27245.5	37659.5	28803.2	20068.1	32969.7	34468.2	34277.6	+	2.82426	0.000778761	9289.56	26611.3	1.51836	Q9BTY2	Plasma alpha-L-fucosidase	FUCO2_HUMAN
4160.71	3797.06	6200.59	0	7627.38	0	9569.36	6397.15	6845.98	6365.28	7801.88	11181.7	8960.47	6739.25	7957.84	6027.19	5942.7	20464.5	9613.34	8161.25	16912.9	13340.5	15847.6	13230.4	8382.97	16994.2	10863	25294.3	+	3.08393	0.00043956	6117.63	12788	1.06375	P00390	Glutathione reductase, mitochondrial	GSHR_HUMAN
3323.18	0	1462.58	0	0	0	0	3127.5	0	0	0	1301.18	996.893	0	0	1579.76	7684.02	10382.8	6371.67	4331.66	5046.14	4658.34	1929.31	10350.6	3598.24	6251.09	6703.91	4647.01	+	4.71223	0	729.381	5252.47	2.84825	Q9NQ38	Serine protease inhibitor Kazal-type 5	ISK5_HUMAN
719.84	2843.89	5365.93	0	4947.92	0	4383.09	4612.5	2863.32	3960.29	0	2889.78	2488.15	2278.85	3019.72	3384.41	11055.2	6091.15	7168	9205.19	4255.55	4153.71	4931.17	11882.2	4286.98	2663.35	2517.25	2470.48	+	2.10493	0.0038042	2668.11	5506.03	1.04519	Q12866	Tyrosine-protein kinase Mer	MERTK_HUMAN
3050.93	0	1134.99	3154.73	3083.96	0	2936.73	2372.4	2274.31	1901.63	3513.21	4534.07	3314.54	3010.32	2454.8	3036.01	8164.37	7548.37	6145.52	11770.3	3184.68	5441.85	5571.2	8350	5030.25	3765.72	5585.07	5764.03	+	3.89968	7.54717e-05	2448.7	5843.73	1.25487	P11717	Cation-independent mannose-6-phosphate receptor	MPRI_HUMAN
0	0	0	0	0	0	0	1920.15	1504.41	0	0	829.616	1167.1	0	866.836	258.031	7307.32	3254.67	471.392	4707.2	7934.66	9120.51	6744.49	10915.1	3863.21	3753.95	4845.82	3365.69	+	4.46565	0	387.234	4814.92	3.63623	P04085	Platelet-derived growth factor subunit A	PDGFA_HUMAN
6254.8	4975.07	5631.68	0	3064.61	0	4958.73	0	3213.42	0	0	6797.94	2562.53	4322.3	5223.45	9131.71	3784.98	11661.5	36537.5	15152.5	16755.2	15954.4	2687.81	3524.76	8558.49	11727.6	28695.4	17257.5	+	3.16765	0.000404494	2984.36	13332.3	2.15943	O00151	PDZ and LIM domain protein 1	PDLI1_HUMAN
920.83	5893.11	2172.04	0	3526.98	0	2673.03	3297.01	0	2176.54	4874.82	3662.48	0	533.707	1760.75	2728.12	17128	12232.3	23219	4018.39	10567.8	18476.8	8442.48	31809.5	8779.69	11005	14152.6	3531.07	+	3.58365	0.000190476	2123.61	11989.4	2.49717	P05164	Myeloperoxidase	PERM_HUMAN
10714.3	6975.52	12700.6	0	8821.35	0	7466.15	5710.43	12343	0	9328.02	8996.09	0	0	9459.03	13270.7	10649	23960.5	18602.4	32992.3	13313.5	22432.3	9180.12	9780.31	18908.7	8640.92	24238.2	7696.12	+	3.43154	0.000222222	5932.54	15937.4	1.42569	P23284	Peptidyl-prolyl cis-trans isomerase B	PPIB_HUMAN
37788	4036.47	16361.8	0	13357.8	19110.4	8684.34	11968	8744.66	16126.9	0	5186.37	23662.3	7955.47	7605.69	34003.6	48573.7	105563	36551.6	70939.7	12786	23636	21190.1	55194.3	24363	30702.8	38181	15199.6	+	2.60971	0.00125424	12355.9	37463.6	1.60029	P41222	Prostaglandin-H2 D-isomerase	PTGDS_HUMAN
5640.8	9421.17	8677.97	0	5450.88	6477.82	7592.15	5507.48	0	2011.7	1609.35	4816.57	9228.13	0	4320.9	6752.55	15007.4	18312.9	12056.7	21058.4	8059.56	12253.8	8621.22	25403.5	13388.8	8896.62	18779.8	10247.3	+	3.90524	7.69231e-05	4745.29	13082.8	1.4631	P28827	Receptor-type tyrosine-protein phosphatase mu	PTPRM_HUMAN
5757.36	5859.27	0	906.424	0	0	877.048	446.196	0	0	1600.84	1449.16	0	0	0	8056.86	16224.1	13562.7	7148.77	18594	7763.33	8225.51	8671.38	9056.52	17788.2	8166.54	19179.7	9180.66	+	5.81295	0	1206.88	10829.9	3.16567	Q13228	Selenium-binding protein 1	SBP1_HUMAN
3144.79	3040.75	2462.71	0	3871.04	0	4648.69	2173.97	2596.04	4445.93	9899.96	4733.12	2962.48	0	4537.29	6455.18	3406.92	9699.08	19900.4	6284.54	9768.56	8733.58	1770.67	2565.27	8012.07	18963.4	14134	15053.6	+	2.8666	0.000777778	3141.39	9234.61	1.55565	P61956;P55854;Q6EEV6	Small ubiquitin-related modifier 2;Small ubiquitin-related modifier 3;Small ubiquitin-related modifier 4	SUMO2_HUMAN;SUMO3_HUMAN;SUMO4_HUMAN
13355.2	11840	20095.4	30044.5	52633.2	26257.9	35453.9	33892.2	11302	37888.7	12251.7	30341.8	21438.7	0	13387.7	16772.6	19551.5	4254.83	7056.28	6262.48	8740.43	3545.68	2377.54	23399.2	15752	6464.08	14315.4	10704.6	+	2.47564	0.00180328	24056.8	10898.9	-1.14226	Q9NNX1	Tuftelin	TUFT1_HUMAN
8618.83	0	5570.38	0	0	0	9499.88	0	8302.38	8645.17	0	5904.09	9900.32	0	6359.26	30627.9	7326.98	18374.1	8819.77	8410.34	8390.8	7969.33	6391.29	10692.9	16755.9	35118.6	44967.6	31355.9	+	2.92428	0.000699029	4031.5	17254.3	2.09757	P11684	Uteroglobin	UTER_HUMAN
4825.65	6155.21	10077.2	0	6441.46	0	9604.15	5223.79	8481.5	3933.54	7498.48	5900.55	5998.49	2315.89	9037.85	56445	4548.43	19875.7	34108.1	22843.9	33642.8	24384.4	8470.25	11311.4	69281.7	30351.1	113745	51190.6	+	2.98431	0.000633663	5461.13	34945.4	2.67783	Q15942	Zyxin	ZYX_HUMAN

## Sheet: FTC_TN_change
1	2	3	4	5	6	7	8	9	10	11	12	13	14	15	46	47	48	49	50	51	C: Student's T-test Significant TN_FC	N: -Log Student's T-test p-value TN_FC	FDR value	N: Mean TN	N: Mean FC	ratio_FC/TN	T: SAMPLENAME	T: PG.ProteinDescriptions	T: PG.ProteinGroups
562366	1294970	371463	394308	450703	1277790	417738	656223	2132880	352260	544507	500539	771519	287916	407376	477428	2135020	1319130	2048860	10162300	3619570	+	2.03384	0.0226977	694837	3293720	2.24497	P02763	Alpha-1-acid glycoprotein 1	A1AG1_HUMAN
229885	277420	127799	157402	217380	388359	143261	140604	607751	175592	177173	221070	180412	101205	138255	182853	543173	410934	441609	1338910	734067	+	2.57867	0.00591781	218904	608591	1.47517	P19652	Alpha-1-acid glycoprotein 2	A1AG2_HUMAN
2286080	1015740	1457140	1147820	1772380	549544	2165750	1948210	5589890	1100750	2045130	1875300	2024040	1336040	1535600	5369820	3427440	4508250	5593930	4608840	15214900	+	3.01318	0.00206667	1856630	6453860	1.79748	P01009	Alpha-1-antitrypsin	A1AT_HUMAN
8865360	7533830	5766270	6133940	7325040	8366780	8686770	6819370	12770800	6703780	8748780	6113190	7214250	8866110	8431570	12191200	22537800	11317900	14318200	29421000	15763100	+	4.24611	0.000105263	7889730	17591500	1.15683	P04217	Alpha-1B-glycoprotein	A1BG_HUMAN
1470930	1993940	1906280	1850100	1706290	2228280	2300930	1833210	5757090	1031000	1066570	1100070	2116880	1377810	1640250	4496440	5522040	4584480	11938000	4169910	23787000	+	2.71179	0.00433803	1958640	9082970	2.21331	P02750	Leucine-rich alpha-2-glycoprotein	A2GL_HUMAN
13440900	17153600	45765300	37183100	30587100	36494200	21446700	48444900	29161500	17625400	17182000	12600600	24510700	28165000	34947300	66057400	108469000	43227700	30161600	210551000	35530100	+	2.21302	0.0148148	27647200	82332800	1.57433	P01023	Alpha-2-macroglobulin	A2MG_HUMAN
2433.97	3181.64	3976.82	2818.78	4526.35	2829.72	3218.18	4117.95	3092.95	2587.25	3305.58	3090.12	2654.4	1768.65	2934.29	0	0	0	372.147	0	0	+	8.59799	0	3102.44	62.0245	-5.64442	P05067	Amyloid beta A4 protein	A4_HUMAN
16012300	8056070	12702600	8253030	7549130	8879790	11809300	11135200	21583600	7407850	6649490	8111030	14341300	8547590	9183420	21815700	42948700	39884300	63607900	58541300	64480400	+	7.135	0	10681500	48546400	2.18425	P01011	Alpha-1-antichymotrypsin	AACT_HUMAN
7742.76	15114.9	14172.2	5341.3	13837.1	11243.4	34771.9	17824.5	9826.3	8984.08	11391.5	16626.5	9872.22	32433.4	18645.3	122521	60685.5	83133.2	45603	20340.1	59283.9	+	4.46947	0	15188.5	65261.1	2.10324	Q15848	Adiponectin	ADIPO_HUMAN
1774820	1303160	797884	797172	1095810	612301	732049	685365	557446	1610820	832639	501012	883797	715542	1162900	1031370	2839760	1316590	2059340	5705120	998262	+	2.06877	0.0207059	937514	2325070	1.31036	P43652	Afamin	AFAM_HUMAN
905268	798014	706640	606677	681342	794602	667333	593872	637198	614776	528331	718223	724935	544997	846425	716574	3110420	1364060	2072470	19417200	1056060		1.37067	0.113	691242	4622790	2.7415	P35858	Insulin-like growth factor-binding protein complex acid labile subunit	ALS_HUMAN
465236	266182	349749	282397	316124	245629	310031	255407	226858	432753	298534	397401	490877	314110	279302	376385	4678880	428991	386881	17781500	989256		1.40089	0.107469	328706	4106990	3.64321	P02760	Protein AMBP	AMBP_HUMAN
15733.1	14756.3	15920.4	29192.1	15565.3	12945.9	12792.4	8527.75	9449.7	20636.7	12321.8	13219.4	15157.2	11871.6	17382.8	51352.8	31786.7	56997.6	49643.3	49496.1	39228.2	+	8.44753	0	15031.5	46417.4	1.62668	P15144	Aminopeptidase N	AMPN_HUMAN
749311	756924	519873	596926	538839	656507	538769	695895	376749	878060	436030	437052	515714	577212	601081	517709	30444500	919686	2124090	44678200	1273950	+	1.81156	0.0367843	591663	13326300	4.49336	P01019	Angiotensinogen	ANGT_HUMAN
5716.64	12387.2	5167.39	10194.9	6156.05	7763.92	8404.87	4079.36	5033.24	14049.1	4702.68	8686.6	7658.8	6969.25	6534.78	22427.8	76281.3	28365.1	25515.9	95943.5	20483.3	+	3.66353	0.000434783	7566.99	44836.2	2.56687	Q16853	Membrane primary amine oxidase	AOC3_HUMAN
7164890	6274840	11942300	10823900	7704340	6643920	14112600	16744700	6543210	9714770	16768800	8437010	8414500	14901100	6466250	860716	1809210	1235270	2355210	3963900	1574670	+	4.20613	0.0001	10177100	1966500	-2.37162	P02647	Apolipoprotein A-I	APOA1_HUMAN
936645	1059140	1324900	637232	554630	442845	1072480	1551190	809314	768870	1923020	816788	847701	1069810	474338	274540	320776	186523	429950	426553	209311	+	2.90154	0.00279365	952592	307942	-1.6292	P02652	Apolipoprotein A-II	APOA2_HUMAN
6202700	3944540	4592610	3551300	4361750	4490260	5895390	7512830	1329520	4089530	3969040	3103360	3942360	4718810	2930210	403638	194682	84083.7	385239	293704	289009	+	5.63439	0	4308950	275059	-3.96952	P06727	Apolipoprotein A-IV	APOA4_HUMAN
70556.5	179381	41868.2	60479.4	102244	30386.5	99752.4	297118	79376.9	119139	384404	119306	82873.5	63543.7	255731	17188.1	0	25109.8	43387.6	0	62025.3		1.6656	0.0571636	132411	24618.5	-2.42721	P02655	Apolipoprotein C-II	APOC2_HUMAN
69474.4	116703	94727.7	106459	54469.7	62290.9	76593.9	124611	65563.1	66473.1	51461.5	59375.3	117707	76778.6	87245.5	27405.5	0	36856.1	37999.2	64560.1	33870	+	3.37763	0.000862745	81995.5	33448.5	-1.2936	P05090	Apolipoprotein D	APOD_HUMAN
29637.9	19799.9	37782.7	19967.8	30600.1	28766.8	32407.5	68270	31749.2	24699.4	25015.4	28088.6	35890.9	33693	28800.4	7037.76	0	11768.6	25423.6	10161.8	19445.5	+	2.83484	0.00321212	31678	12306.2	-1.3641	O14791	Apolipoprotein L1	APOL1_HUMAN
31221	35708.8	25732.3	24126.9	27974.7	27380.8	38817.5	34078	44858.7	39784.8	43166.6	33661.9	36909	32671.8	47618.5	47100.2	206393	45928.5	128266	129318	51868.2	+	3.19243	0.00135714	34914.1	101479	1.5393	O75882	Attractin	ATRN_HUMAN
48400	44614.8	29597.9	19315.3	23535.3	25701.2	34341.3	29871.1	27564.4	35157.7	19783.7	23382.4	21589.9	36090.2	29381.9	77166	86327.1	26505.7	75302.5	90094.1	27985.2	+	3.36202	0.000923077	29888.5	63896.8	1.09615	P61769	Beta-2-microglobulin	B2MG_HUMAN
17019.5	17231.9	9947.13	18581.2	8396.27	13336.4	9584.94	7128.61	5667.47	11230.3	13073.8	16274.6	6522.66	14021	9530.47	3373.3	0	694.946	0	0	2047.18	+	5.15963	0	11836.4	1019.24	-3.53766	Q15582	Transforming growth factor-beta-induced protein ig-h3	BGH3_HUMAN
162182	133828	117092	114899	118233	126285	148381	108058	112462	117437	76973.5	96480.9	105403	104219	110323	229855	92709.9	199814	199125	1147450	153436		1.40664	0.107238	116817	337064	1.52877	P43251	Biotinidase	BTD_HUMAN
210797	122089	178149	212330	149620	105095	117275	194829	164092	270002	218070	230700	78852.1	144916	196772	129617	586606	254471	195431	784243	275051	+	2.07846	0.0204762	172906	370903	1.10105	P02745	Complement C1q subcomponent subunit A	C1QA_HUMAN
731429	645237	686187	984411	629657	970604	767200	802341	793501	979964	804072	957232	964471	734983	731479	674810	2251660	1526380	1625100	2321300	1751720	+	4.67908	0	812185	1691830	1.0587	P02747	Complement C1q subcomponent subunit C	C1QC_HUMAN
148302	97425.9	99933.7	65555.9	89409.2	76614	103113	89424.6	132144	97018.2	123554	100183	111740	118780	119843	0	34361.8	30953.5	31146.6	77407.8	23724.2	+	5.6157	0	104869	32932.3	-1.67101	P20851	C4b-binding protein beta chain	C4BPB_HUMAN
8256.31	9726.82	11159.9	12103.5	9802.38	14793.4	7852.14	10445.9	8460.96	15276.2	8647.93	9665.9	10696.9	8168.16	9520.5	2034.44	5949.42	3869.72	3002.64	0	3390.97	+	5.82648	0	10305.1	3041.2	-1.76065	P55290	Cadherin-13	CAD13_HUMAN
15215	8660.5	8912.36	5237.21	7966.22	15432.4	8167.38	8042.61	4720.03	6742.37	3596.92	3251.85	6567.64	11452.3	4068.64	1227.61	0	3806.92	0	0	5901.31	+	2.71259	0.0044	7868.9	1822.64	-2.11013	P12830	Cadherin-1	CADH1_HUMAN
27449.8	26873.5	29644.4	35120.8	13942.9	63548.3	22832.8	25814.6	9976.66	33961.8	12807	25482.4	24589.5	21437.3	12692	0	0	5608.54	0	0	7418.76	+	3.44027	0.00072	25744.9	2171.22	-3.56771	P33151	Cadherin-5	CADH5_HUMAN
242226	126864	177551	136616	84660.1	60598.8	89475.6	121928	43194.6	181313	158324	104138	149470	33123.9	105456	172692	1244140	187871	1097420	9731740	332711		1.35586	0.115259	120996	2127760	4.1363	P00915	Carbonic anhydrase 1	CAH1_HUMAN
34172.8	12405.3	8917.02	7946.92	7934.1	4998.26	8818.06	7411.29	4162.86	16707.7	14294	11941.7	12631	3846.64	9789.59	30817.8	429715	26128.3	109080	2159350	24774.6		1.35765	0.115463	11065.2	463311	5.38788	P00918	Carbonic anhydrase 2	CAH2_HUMAN
25012.1	9217.49	12392.4	15519.2	11094.8	6782.81	13211.2	11876.3	8558.12	20809.3	19195.6	13297.5	15053.9	2855.11	11039.5	22288.9	36745.5	20643	59162.3	62400.6	20004.6	+	3.54587	0.000571429	13061	36874.2	1.49735	P04040	Catalase	CATA_HUMAN
276492	321102	213288	290972	167981	136777	164252	185738	129033	190731	262432	239288	252060	180160	309059	316953	585212	484814	580276	1024170	546155	+	4.84454	0	221291	589596	1.41378	P15169	Carboxypeptidase N catalytic chain	CBPN_HUMAN
9553.77	6880.65	3394.27	6158.99	9935.29	11531.4	8902.18	8484.99	11206.8	10339.1	4821.06	4113.54	10431.7	10758.3	7015.89	32472.7	97323.1	32149.7	35840.8	88620.6	39993	+	5.15208	0	8235.19	54400	2.72373	Q13740	CD166 antigen	CD166_HUMAN
37932.3	26258.6	31885.2	16261.2	26791.1	23610.4	39066.6	25729.6	28210.4	19520.1	16479.2	23347.7	30646.4	27100.8	21453.4	142371	225050	86866.5	125469	1093330	129775	+	1.96894	0.0262472	26286.2	300477	3.51488	P16070	CD44 antigen	CD44_HUMAN
8285.27	7814.18	6465.63	4544.75	5986.12	6134.75	6161.38	5151.75	4044.16	5372.55	3704.02	5551.64	6740.69	9625.19	4789.92	34101.3	60199	24470.6	16339.2	28507.1	25744.2	+	5.66498	0	6024.8	31560.2	2.38912	Q9NZK5	Adenosine deaminase CECR1	CECR1_HUMAN
7456550	7619990	5037370	6970750	6259020	9378780	3936370	4725530	12147800	4416320	4804690	3886150	6816160	5107620	5251180	20225100	26477300	25091600	28226100	63136600	19854900	+	4.89446	0	6254290	30501900	2.28598	P00450	Ceruloplasmin	CERU_HUMAN
4289300	4051870	3494160	3934310	4801790	5215230	4276640	3270990	7056000	3981410	4211250	2046710	4400360	3605790	4085200	7129100	17161400	9923640	8177100	17774700	11728800	+	5.46332	0	4181400	11982500	1.51887	P00751	Complement factor B	CFAB_HUMAN
1884600	2085790	1429130	1367380	1589710	1899320	2045670	1220110	2502630	2002710	1447630	1287820	1839980	1638730	2285620	3027620	10289400	4126790	4222950	23883000	3966310	+	2.34978	0.010359	1768460	8252690	2.22237	P08603	Complement factor H	CFAH_HUMAN
488314	575092	402408	455614	460614	496724	422528	274739	473582	525387	426510	357265	376239	469591	515695	518972	2820030	923404	2476610	10593900	1286320	+	1.976	0.0259091	448020	3103210	2.79213	P05156	Complement factor I	CFAI_HUMAN
41728.8	31489.9	37223.7	37680.4	31072	44325	50024.3	40423.5	34589.2	37723.9	25648.4	31076.2	71529	34983	39064.3	88835.8	117823	85578.4	80887.4	103847	110724	+	8.36416	0	39238.8	97949.2	1.31975	O00533	Neural cell adhesion molecule L1-like protein	CHL1_HUMAN
177577	228344	221863	164641	169709	208491	193341	171469	213474	296737	151267	144127	199433	292242	227634	433349	868560	785626	998903	2615020	737521	+	3.59544	0.000510638	204023	1073160	2.39506	P06276	Cholinesterase	CHLE_HUMAN
61143.3	132338	90044	76311.3	32888.8	76891.2	79558.7	73593.6	53673.7	74447.6	42732.6	64021.3	67656.7	38200.1	42121.9	17227.2	22653.4	6233.19	22088	40894.1	35354.4	+	3.10531	0.00196491	67041.5	24075	-1.47752	Q96KN2	Beta-Ala-His dipeptidase	CNDP1_HUMAN
9954.41	6770.52	9414.11	9931.05	8680.46	14539.6	10074.4	15996.1	7899.67	8682.23	6203.02	8241.15	14631.1	9464.41	10053	42825.6	18478.4	43041.1	28799.8	0	30288.9	+	3.20927	0.00138182	10035.7	27239	1.44053	Q12860	Contactin-1	CNTN1_HUMAN
454292	344328	245310	255481	273630	361313	319406	219772	403666	312325	235123	166530	323529	301129	308782	439195	12989900	549013	964257	9625210	568197	+	1.93441	0.0279565	301641	4189300	3.7958	P06681	Complement C2	CO2_HUMAN
1132800	914938	871628	1135400	750029	967197	930638	737993	1023480	933009	748001	1072610	1198050	1113460	1042260	660414	2856940	1201420	1651340	10858800	1612700		1.45419	0.0982333	971432	3140270	1.6927	P01031	Complement C5	CO5_HUMAN
171497	147844	82596.4	109865	70387.5	94388.6	93233.9	95832.5	80081	104162	60859.9	109040	84478.5	237242	133687	122509	1105030	176646	163421	610925	185571	+	1.9896	0.0252414	111680	394017	1.81889	P10643	Complement component C7	CO7_HUMAN
49356.2	49121.5	38993.1	52066.6	27012.9	23183.7	24956.4	27703.2	18572.9	38733.5	45343.2	57861.9	24681.7	52116.2	34049.1	2208.18	0	3302.65	8960.43	0	31444.9	+	4.01891	9.30233e-05	37583.5	7652.69	-2.29606	P02748	Complement component C9	CO9_HUMAN
39539.5	44589.6	18695.9	37076.1	22410.1	31640.2	32008.8	25759.4	12140.1	33360.5	31642	33051.4	36590.4	41142.5	20715.5	0	9022.07	12561.8	1566.85	0	14119.5	+	5.03243	0	30690.8	6211.71	-2.30474	P49747	Cartilage oligomeric matrix protein	COMP_HUMAN
39960.1	39142	40999.6	80560.2	49265.8	60312.7	58384.7	55701.9	48838.9	39217.5	45475.2	34435.8	41021.8	68650.2	58396	144311	163080	144740	93046	88911.2	161873	+	7.04943	0	50690.8	132660	1.38794	Q9NQ79	Cartilage acidic protein 1	CRAC1_HUMAN
18062	76970	10096.1	11292.9	11733.7	19104.1	11474	32017.4	158815	19876.7	23373.7	11620.7	20295	12371.6	19984.4	0	830496	34209.4	785562	59685.9	967061	+	2.73897	0.00417391	30472.5	446169	3.87201	P02741	C-reactive protein	CRP_HUMAN
132647	107292	80623.8	56649.8	55089.6	88162.8	83864.3	59910.6	63123.7	93148.1	53777.7	82612.8	81866.9	78057.1	69950.1	133853	400334	127059	76512.3	1812730	258968		1.52137	0.0814237	79118.4	468243	2.56517	P01034	Cystatin-C	CYTC_HUMAN
23942.3	9604.83	17682.1	10942.9	13662.6	12804.3	16101.6	12746.9	13844	14037.8	12213.8	14664.8	11671.9	10906	11612.3	9773.17	0	7394.06	111315	241316	83610	+	1.81878	0.0362772	13762.5	75568.1	2.45703	Q01459	Di-N-acetylchitobiase	DIAC_HUMAN
47580	103278	135088	9477.41	47270.4	112701	27916.2	54579.5	51211	19405.5	39784.1	42706.7	59078.3	47079.5	25338.8	116256	215196	220991	178306	376391	201992	+	5.31262	0	54832.9	218189	1.99246	P09172	Dopamine beta-hydroxylase	DOPO_HUMAN
430168	427885	438908	438564	338313	242247	248750	338103	485707	273383	199819	395780	412472	265761	331056	725835	885367	624684	814900	7521240	614005		1.39274	0.108961	351128	1864340	2.4086	Q16610	Extracellular matrix protein 1	ECM1_HUMAN
12871.4	12343.8	11435.1	9978.8	9413.32	11228.4	10964.3	8734.98	11082.9	12962	9315.15	7768.85	9646.78	9001.05	9557.54	34509.2	386062	44725.7	43157.2	0	37513.2		1.4243	0.103968	10420.3	90994.6	3.12638	Q13822	Ectonucleotide pyrophosphatase/phosphodiesterase family member 2	ENPP2_HUMAN
447998	472855	442683	305899	282317	402623	336167	329112	228829	312593	528678	458576	354494	344866	359970	10294	78029.2	111991	115255	406183	58698.1	+	4.09954	9.52381e-05	373844	130075	-1.52309	P00742	Coagulation factor X	FA10_HUMAN
49134	73493.9	56400.2	54641.7	44510.3	52305	80040.5	44718.9	60416.3	43230.9	54108.6	50055.9	49520.5	40118.4	46195.4	68243.8	253909	69503.2	94707.2	373891	82937.3	+	2.38008	0.00945455	53259.4	157199	1.56148	P03951	Coagulation factor XI	FA11_HUMAN
13111.3	15231.5	24040.4	8218.48	17121.2	14507.5	16708.8	12196.2	17867.9	16591.8	8991.51	13159.1	11561.3	14733.8	15611.3	41076.9	68447.8	91003.9	56028.4	77305.7	55535.3	+	8.77076	0	14643.5	64899.7	2.14795	P08637	Low affinity immunoglobulin gamma Fc region receptor III-A	FCG3A_HUMAN
19107.6	23729.9	20606.5	18767.4	14471.5	25440.5	19738.6	18840.6	19763.6	16136.9	15242.1	28745.1	35786.8	19853.8	20545.5	28432.5	149092	65945.4	50396	311322	42731.8	+	2.34963	0.0102278	21118.4	107987	2.35429	Q9Y6R7	IgGFc-binding protein	FCGBP_HUMAN
660808	301558	527877	340250	59614.6	251078	224976	329805	482584	89375.1	192128	414981	346721	423435	513016	547993	2250490	592474	1223630	8471220	376211		1.60947	0.0637586	343881	2243670	2.70588	O75636	Ficolin-3	FCN3_HUMAN
4824350	5421100	5205290	3405970	3222180	3590100	4183690	5019230	2476570	6365850	4471310	4393280	3617450	3630740	3658290	525773	1505690	1126110	1129940	3235870	1243900	+	4.86973	0	4232360	1461210	-1.5343	P02765	Alpha-2-HS-glycoprotein	FETUA_HUMAN
97148.4	140569	44497.1	95776.3	135279	65306.2	116152	70778.2	130677	83462.5	117017	100931	89667.1	63220.5	89718.1	914638	3460010	1390740	1334930	189864	288814	+	3.07378	0.002	96013.4	1263170	3.71767	Q03591	Complement factor H-related protein 1	FHR1_HUMAN
1521080	1751280	1159030	1210370	1012990	597103	828095	846547	499264	1472900	1052460	1258410	1002620	1594790	1212560	140965	244349	162890	179378	197808	155975	+	5.43014	0	1134630	180228	-2.65433	P02751	Fibronectin	FINC_HUMAN
290500	399609	349593	483879	279953	153496	290710	334438	81736.8	416466	399743	815155	251432	458119	227180	50353.3	65386.6	30996.4	52697.3	81017	50216.3	+	3.2822	0.00111111	348801	55111.1	-2.66199	P06396	Gelsolin	GELS_HUMAN
31459.9	14810.5	20117.8	10197.1	27735.7	17313.8	36739.8	16708.2	42567	18944.2	10707.8	17052.9	28056.2	20529.6	18336.1	91787.1	115439	55407.1	178549	274287	134437	+	5.17897	0	22085.1	141651	2.6812	Q92820	Gamma-glutamyl hydrolase	GGH_HUMAN
107997	154391	192765	78808.3	207000	146792	230130	134574	203770	101441	136461	162777	114933	115168	154225	127716	742285	183620	212617	1594560	209317		1.67727	0.0562963	149416	511685	1.77592	P07359	Platelet glycoprotein Ib alpha chain	GP1BA_HUMAN
43316.4	18946.4	17816.9	18624.4	39348.5	20370.3	43990.9	32645.4	22963.6	26500	24206.1	12990	21879.9	4840.2	20797.8	0	16962.5	5991.77	7057.26	25247.2	5983.93	+	1.96782	0.0259556	24615.8	10207.1	-1.27001	Q14520	Hyaluronan-binding protein 2	HABP2_HUMAN
841616	164255	207753	335051	111444	184668	423515	409728	464424	325076	882088	417451	601992	95028.1	391700	425255	2735240	555500	4699060	5835570	661656	+	2.67493	0.00483333	390386	2485380	2.67049	P69905	Hemoglobin subunit alpha	HBA_HUMAN
947802	155994	229411	395930	115885	197411	429974	378654	509971	324402	913138	364393	622468	137667	441187	376855	1405180	734036	5552930	4025920	748437	+	2.3338	0.0104	410952	2140560	2.38095	P68871	Hemoglobin subunit beta	HBB_HUMAN
43524.9	18551.8	16184.8	23984.5	8032.12	24095.5	22982.1	15820.6	25543.8	19438.9	31983	19796.7	50759.7	8782.97	17449.8	25462.2	93032.8	39186	282896	767403	49026.3	+	1.74822	0.0448	23128.7	209501	3.1792	P02042	Hemoglobin subunit delta	HBD_HUMAN
15437400	12857700	13420300	11817700	12382300	14164800	11680100	11606400	12932300	10128500	9602600	7805090	11437000	10064300	9605540	34886900	35398400	24201400	45329500	45420500	36801600	+	9.55186	0	11662800	37006400	1.66586	P02790	Hemopexin	HEMO_HUMAN
391003	461475	368696	293151	208582	113358	189602	295139	106815	455162	506913	431013	198252	392794	331833	34963.8	57854	16677.2	57692.4	154546	66934.3	+	3.70971	0.000444444	316252	64778	-2.2875	P05546	Heparin cofactor 2	HEP2_HUMAN
78539.7	37969.8	83282.2	59527.1	71688.5	96141.4	94028.6	90793.3	56182.3	43312.3	41124.7	34072.2	74570.7	64437.2	87940.8	25866	228419	84683.5	77997.8	664517	231336	+	1.73392	0.0466792	67574	218803	1.69509	Q04756	Hepatocyte growth factor activator	HGFA_HUMAN
12115.4	45918.3	22755.7	11636.5	11752.3	19528.8	35532.8	43136.7	53110.3	25497.2	25028.2	32550	47344.2	24992.3	18096.3	13629.4	0	5073.57	7629.03	0	12328.5	+	2.89245	0.00275	28599.7	6443.42	-2.1501	P00739	Haptoglobin-related protein	HPTR_HUMAN
251929	172233	111009	287131	215334	142933	396198	281741	183361	379661	237980	75620.2	269232	162770	146963	24544.4	118172	43962.6	85221.4	266539	61657.6	+	1.88951	0.0312766	220940	100016	-1.14342	P04196	Histidine-rich glycoprotein	HRG_HUMAN
103076	177411	449418	203967	168666	400983	454858	304577	371834	117836	338821	408218	226664	755653	349213	324184	122692	118594	110238	0	188445		1.55814	0.0735043	322080	144025	-1.1611	P01764	Ig heavy chain V-III region VH26	HV303_HUMAN
434367	2603620	1483280	1044490	947677	1843750	1627070	1296800	1412150	675197	1574800	1623410	1532630	2170800	1951710	2986850	5658500	1307850	1291790	5465390	1283600	+	1.82144	0.03632	1481450	2999000	1.01747	P01766	Ig heavy chain V-III region BRO	HV305_HUMAN
942329	18770200	7271350	3784490	3350260	8552190	6701600	3573890	7236790	2452670	5435790	5605010	7087970	16675900	4198760	9891740	155359000	9540740	3042410	462127000	6946840		1.41223	0.106304	6775950	107818000	3.99203	P01772	Ig heavy chain V-III region KOL	HV311_HUMAN
13710.5	14171.6	14312.9	10804.6	9050.52	8467.42	12056.5	11482.7	4175.7	12116	12707.9	15107.6	18289.7	9597.18	9887.58	0	8519.5	0	0	0	0	+	5.34196	0	11729.2	1419.92	-3.04622	Q9Y4L1	Hypoxia up-regulated protein 1	HYOU1_HUMAN
30280.9	14944.1	22360	42248.8	22888.6	41950.6	39964.7	19214.7	40525.2	13168.6	30280.7	19753	47703.6	48706.1	27611.9	29252.1	122975	36433	57909.4	66658.6	111801	+	2.82793	0.00322388	30773.4	70838.2	1.20284	P18065	Insulin-like growth factor-binding protein 2	IBP2_HUMAN
184978	252115	131081	99856.8	137045	155990	141025	122862	118039	110003	117908	162153	104459	76055.3	125439	138411	623575	335476	516784	3200750	289525		1.63893	0.0601416	135934	850753	2.64583	P17936	Insulin-like growth factor-binding protein 3	IBP3_HUMAN
92609.9	77424.5	67147.9	36174.2	66953.3	59403.8	70126.9	72443.9	76683.4	68323.2	47504.1	40690	56646.3	44761.2	62871.6	118327	323042	121161	182659	322342	133232	+	4.56946	0	62650.9	200127	1.67551	P22692	Insulin-like growth factor-binding protein 4	IBP4_HUMAN
21998.5	29798.8	21816.5	1042.52	15595.3	32025.5	25356.3	18083.3	17566	34737.2	11788.8	24790.3	37581.9	27239.8	22444.8	44926.4	115159	93365.1	45544.3	86387.7	70367.1	+	5.69958	0	22791	75958.3	1.73674	P24593	Insulin-like growth factor-binding protein 5	IBP5_HUMAN
30728.4	9881	17471.9	10393.4	12064.6	21700	10732.2	13591.9	13138.8	16654.9	9795.23	17462.3	15622.8	22282.3	11971.5	58760.8	26932.4	42570.5	31902.1	28337.7	62284.8	+	4.83829	0	15566.1	41798	1.42503	Q16270	Insulin-like growth factor-binding protein 7	IBP7_HUMAN
2901000	520016	1870500	1242760	2090560	1658530	1914000	1234260	2012290	319985	576574	544107	1978320	1666740	2024580	1829620	34165300	3220770	832767	6465330	3805750		1.36255	0.115008	1503610	8386590	2.47965	P05155	Plasma protease C1 inhibitor	IC1_HUMAN
11263.6	11192.8	6215.6	9637.46	6239.78	9373.74	8604.18	8134.57	7895.47	12650	4936.8	5383.61	7170.29	6835.54	3641.3	26074.5	0	20933.8	20859.9	0	35413.6		1.66152	0.0573333	7944.98	17213.6	1.11543	P05362	Intercellular adhesion molecule 1	ICAM1_HUMAN
25191.5	17180.7	21846.4	11719	17371.8	6246.93	23935.2	19896.2	17870.2	11783.6	9290.19	15451.6	15140.9	10599.7	13598.7	56398	120058	57148.7	54865.7	0	98812.7	+	3.7312	0.000454545	15808.2	64547.2	2.02968	P13598	Intercellular adhesion molecule 2	ICAM2_HUMAN
11853.6	15599.2	19130.2	8121.27	9565.09	24265.9	9127.18	9432.16	11596.8	14185	5601.39	8403.61	7571.41	17559.7	14757.2	34790	422039	34087.1	44821.9	58625.4	71607.1	+	1.74938	0.0450385	12451.3	110995	3.15613	P32942	Intercellular adhesion molecule 3	ICAM3_HUMAN
2537230	19254400	7886440	10429300	8030230	11871300	15585200	11321400	21659400	2580590	11546900	13941800	23494300	20663400	23056500	70597900	16167300	30141700	12956400	24510900	11172800		1.43934	0.0997073	13590600	27591200	1.0216	P01859	Ig gamma-2 chain C region	IGHG2_HUMAN
1711890	14431200	3024690	1362880	4375110	6749150	5642620	11014200	8023030	2496960	4573300	6868570	3653050	3983840	2570990	4249430	7784730	4977050	7186190	30568400	14586200		1.33968	0.119441	5365430	11558700	1.10721	P01871	Ig mu chain C region	IGHM_HUMAN
17087700	24851200	12267200	20856000	11032700	27521000	10840600	11991800	14875400	26368800	10603600	10986100	18285200	16433800	16953800	35406600	776748000	43166500	38092100	1838920000	46237400		1.61606	0.0633043	16730300	463095000	4.79077	iRT-Kit_WR_fusion	NaN	iRT-Kit_WR_fusion
100813	72863.5	65366.2	58617.2	112839	137866	27266.1	152030	67231.9	618981	41879.3	136985	52211.2	103305	63288	258049	139949	239290	99223.1	604918	317758		1.30913	0.127194	120770	276531	1.19518	P35908	Keratin, type II cytoskeletal 2 epidermal	K22E_HUMAN
280556	280728	247312	235514	273962	224412	301245	292185	138646	198164	308694	266949	198315	256686	398497	609897	2517400	1036980	712699	5410840	607342	+	2.41472	0.00852632	260124	1815860	2.80338	P03952	Plasma kallikrein	KLKB1_HUMAN
41882.6	327572	200410	122395	121491	179065	203209	156044	222017	62731.1	201799	196066	177563	346507	321672	220887	0	77443.8	65701	0	126481	+	1.75877	0.0437282	192028	81752.2	-1.23199	P01625	Ig kappa chain V-IV region Len	KV402_HUMAN
725828	3085000	2867250	1811410	1721220	2095290	2047800	1780010	2633520	896845	3121120	3516360	2523070	8111290	3564510	4279800	65270300	3433760	1690790	24898200	2157100		1.44819	0.0989421	2700030	16955000	2.65066	P0CG05	Ig lambda-2 chain C regions	LAC2_HUMAN
15136.5	33942.5	23629.6	22650.9	18325.4	67823.5	13422.9	17031.1	17590.3	33086.4	24801.5	14882.6	12017.4	25016.6	29616.2	19636.7	0	12431.3	17030.9	0	18083.2		1.3768	0.112615	24598.2	11197	-1.13544	P13473	Lysosome-associated membrane glycoprotein 2	LAMP2_HUMAN
8222	7542.26	5004.89	2729.66	4909.92	2726.3	2878.1	5895.76	2647.98	5501.51	7129.99	6192.89	1908.68	3077.82	5014.87	0	0	0	0	0	5188.05	+	3.06876	0.0019661	4758.84	864.675	-2.46038	P18428	Lipopolysaccharide-binding protein	LBP_HUMAN
6884.88	17582.3	5106.5	6272.63	5020.33	3919.28	5740.06	7008.49	3442.45	10576.2	5193.75	3810.06	4993.79	6547.55	15798.5	16402.5	24090.7	13083.7	14457.8	26664.4	20574	+	4.50389	0	7193.12	19212.2	1.41733	Q07954	Prolow-density lipoprotein receptor-related protein 1	LRP1_HUMAN
51941.4	357457	292052	94418.1	106933	106020	250185	139349	251012	95955.1	276615	336686	150294	384578	289204	1329420	532012	496521	395702	215135	669893	+	2.84315	0.0032	212180	606446	1.51509	P04211	Ig lambda chain V region 4A	LV001_HUMAN
667983	1584680	780698	790725	498280	1197070	840583	572320	761214	363584	520850	1657400	973448	1115120	726893	1319530	53418300	1742100	856132	212865000	2425500		1.32927	0.120986	870057	45437800	5.70664	P01701	Ig lambda chain V-I region NEW	LV103_HUMAN
60384.5	106715	115387	76650.7	88368.4	130410	95408.7	97004.5	116811	92784.5	54505.8	72594.6	95702	61673.5	62330.2	252571	596476	200852	173890	0	147042	+	1.92618	0.0283871	88448.6	228472	1.36911	P14151	L-selectin	LYAM1_HUMAN
80922.1	84210.3	145295	22574.1	49629.7	65283.7	53676.3	91276.4	56295.2	42175.2	36266.9	36271	40852.6	46570.8	29818.6	197118	2165750	381887	238432	0	401888		1.70926	0.0505794	58741.2	564179	3.26371	P61626	Lysozyme C	LYSC_HUMAN
69458.3	60987.3	60745.6	53534.8	34396.7	55261	40540.2	51766.5	39880.6	52406.5	47768.9	58117.1	53233.8	64092.7	49616.5	7392.96	0	13867.6	11151	0	0	+	9.08083	0	52787.1	5401.92	-3.28864	P48740	Mannan-binding lectin serine protease 1	MASP1_HUMAN
89399	54445.1	48764.7	74323.3	24900	38542.2	41603.4	45957.2	58361.1	48666.8	34090.7	75181.5	79342.6	68674.4	61088.5	25359.6	0	15012.3	15667.5	0	9283.54	+	4.73594	0	56222.7	10887.2	-2.36852	O00187	Mannan-binding lectin serine protease 2	MASP2_HUMAN
57767.2	27308.6	35385.9	60873.9	79026.5	23587.8	28611.9	65040.6	169724	45061.8	22139.9	60761.1	47383	31147.1	40960.9	686050	284086	464608	140710	1505660	91197.7	+	2.74232	0.00423529	52985.3	528718	3.31883	P11226	Mannose-binding protein C	MBL2_HUMAN
9177.77	4923990	20001.8	7477.67	33944.3	58509.9	11153.3	49765	5245.9	14821	21158.3	35610.8	19132.9	19138.7	12584.2	11189.9	1510870	1466290	1736040	11697100	5300870	+	1.88442	0.0315368	349448	3620390	3.373	P04220	Ig mu heavy chain disease protein	MUCB_HUMAN
16011	13737.7	16059.6	12013.5	18190.6	20685.2	24466.4	18324.8	21102.9	14819	14284.6	22315	16228.6	21467.1	17246.8	35813.2	67374.4	28081.4	6757.05	231953	12808.1		1.37315	0.11313	17796.9	63797.8	1.84188	P12955	Xaa-Pro dipeptidase	PEPD_HUMAN
31085.4	35158.2	15376.8	39042.6	24443.2	55999.7	29448.9	26627.4	25247.7	32820.6	10238.5	17914.9	23496.1	20338.1	14737.8	43004	216701	95949.2	57797.2	0	81126.7	+	2.08333	0.0204337	26798.4	82429.7	1.62102	Q6UXB8	Peptidase inhibitor 16	PI16_HUMAN
15305.6	7794.77	14119.9	11428.8	12229.9	5631.23	4393.71	19862	4399.94	7672.29	15537.1	21250.5	11131.8	16175.2	9026.26	0	0	0	0	0	2340.66	+	4.22001	0.000102564	11730.6	390.111	-4.91025	P55058	Phospholipid transfer protein	PLTP_HUMAN
6310.41	15694.7	6932.92	9990.73	7246.27	2335.61	7133.05	7816.51	6144.01	7765.68	13576	11898.6	7682.97	5847.21	10176.2	9563.73	58567.2	19153.9	37482.2	293492	29320		1.62312	0.0626316	8436.73	74596.5	3.14435	Q92954	Proteoglycan 4	PRG4_HUMAN
88078.3	93561.3	100091	206869	99547.5	84183.8	87361.5	58921.5	63005.3	206669	35503.1	47221	125144	97590.5	91798.5	215272	1054830	192045	314773	1784270	265493	+	2.445	0.00821333	99036.3	637782	2.68703	P27918	Properdin	PROP_HUMAN
157448	132588	106080	65542.3	81722.5	109888	86837.3	87218.2	101171	91253.5	131298	129878	91403.2	104076	82070.8	16162.2	48020.5	37638.4	26658.4	0	37110.6	+	5.84343	0	103898	27598.3	-1.91252	P07225	Vitamin K-dependent protein S	PROS_HUMAN
30249.2	48090.9	28727	26940.4	26063	28499.7	28594	35585.6	17751	33273.3	31101.6	31329.3	27199.9	21261	24450.9	28556.1	160662	28816.4	47854.6	250308	36532.7	+	1.86661	0.0326186	29274.4	92121.6	1.6539	P15151	Poliovirus receptor	PVR_HUMAN
22024.9	2763.08	15033.9	31023.3	14825.2	13523	22297.2	12867.1	13998.2	16891.6	13626	16236.8	17463.3	20199	12502.8	32077.9	125125	36112.6	46408.4	126098	29651.2	+	3.30411	0.0010566	16351.7	65912.2	2.0111	Q6UX71	Plexin domain-containing protein 2	PXDC2_HUMAN
153736	139548	91244.4	69358.2	88205.4	109583	121411	103378	51654.5	85963.2	98027.4	175026	107479	58419.4	109997	55453.4	57266.8	57627.4	53713.2	1904.98	50282.4	+	2.99325	0.00229508	104202	46041.4	-1.17838	P02753	Retinol-binding protein 4	RET4_HUMAN
208237	156220	214440	75998	153794	120499	210585	249167	198255	91705.7	229943	148372	213538	147795	156853	30619.1	43825.3	29777.5	34996.1	298862	43085.7	+	1.83942	0.0351515	171693	80194.2	-1.09826	P35542	Serum amyloid A-4 protein	SAA4_HUMAN
31913.7	28452.7	26377.6	40355.6	33212.3	39997	52453.5	29829.8	47654.3	29688.3	32081.2	10660.9	31723.5	32659.2	22488.4	8673.85	0	0	1708.01	0	17309.9	+	5.26451	0	32636.5	4615.3	-2.82199	P09486	SPARC	SPRC_HUMAN
3788.79	8415.62	9800.48	6583.93	11726.4	10563.3	9168.49	10944.5	14393.5	15321.9	6296.71	9074.85	9864.07	10440.9	11493.8	21294.7	51087.1	23735.9	21920.4	307007	19497		1.44433	0.0993115	9858.48	74090.4	2.90985	Q7Z7G0	Target of Nesh-SH3	TARSH_HUMAN
55577.6	51342.1	33761.7	30534.7	23733.2	75038.6	18964.4	25793.3	28843.4	33086.3	29744.2	19981.7	37663.3	48098.5	31532.2	90334.9	575579	73519.4	97633.2	32568.7	114629		1.67583	0.056	36246.4	164044	2.17817	P05543	Thyroxine-binding globulin	THBG_HUMAN
20246.5	36055.9	16717.6	15854	14725.4	30100.4	15914.9	18220.8	19570.3	25896.2	12259.8	14968.3	12705.3	11486.9	11552.9	33658.3	164199	49145.1	44684.3	0	83918.1	+	2.21067	0.0147317	18418.4	62600.8	1.76503	P01033	Metalloproteinase inhibitor 1	TIMP1_HUMAN
14702800	11804000	11214800	9029880	12126900	12292900	12536000	10443100	14205200	9998720	8994680	8984500	13181200	6799580	12143800	29006200	64193700	26599300	29889400	99339200	35665600	+	4.10614	9.7561e-05	11230500	47448900	2.07895	P02774	Vitamin D-binding protein	VTDB_HUMAN
4277470	3930950	3522610	4560790	5474090	4592460	5015110	5916500	4832670	6204380	4043490	2522330	4082490	3368910	2183030	403529	768466	708484	837728	513138	707342	+	6.56374	0	4301820	656448	-2.71219	P04004	Vitronectin	VTNC_HUMAN
20295.2	14227.2	22841.7	11677.3	13700.2	14265.9	18365.2	11546.3	18198.3	16495.7	7466.61	0	12419.3	0	15715.1	19311.3	31807.5	73100.6	42538.2	250663	22352.7	+	1.85346	0.033551	13147.6	73295.6	2.47893	Q9NTU7	Cerebellin-4	CBLN4_HUMAN
